# Supplementary material for: Synthesis, Characterization, X-Ray Crystallography, and Antileishmanial Activities of N-Linked and O-Linked Glycopyranosides
Source: Hindawi journal article supplement (doi:10.1155/2018/9648710), 2018-01-01

swk40723\_swk-galac-nhr\_PROTON\_001

# <sup>1</sup>HNMR of compound 5b

| Parameter                 | Value                                                                                                             |
|---------------------------|-------------------------------------------------------------------------------------------------------------------|
| 1 Data File Name          | C:/ Users/ sherwali/ Desktop/ NMR/ swk40723_swk-galac-nhr_20111120_01/ swk40723_swk-galac-nhr_PROTON_001.fid/ fid |
| 2 Title                   | swk40723_swk-galac-nhr_PROTON_001                                                                                 |
| 3 Comment                 |                                                                                                                   |
| 4 Origin                  | Varian                                                                                                            |
| 5 Owner                   |                                                                                                                   |
| 6 Site                    |                                                                                                                   |
| 7 Spectrometer            | vnmr5                                                                                                             |
| 8 Author                  |                                                                                                                   |
| 9 Solvent                 | cdcl3                                                                                                             |
| 10 Temperature            | 25.0                                                                                                              |
| 11 Pulse Sequence         | s2pul                                                                                                             |
| 12 Experiment             | 1D                                                                                                                |
| 13 Number of Scans        | 16                                                                                                                |
| 14 Receiver Gain          | 30                                                                                                                |
| 15 Relaxation Delay       | 2.0000                                                                                                            |
| 16 Pulse Width            | 0.0000                                                                                                            |
| 17 Acquisition Time       | 4.0894                                                                                                            |
| 18 Acquisition Date       | 2011-11-20T20:49:01                                                                                               |
| 19 Modification Date      | 2011-11-21T01:50:48                                                                                               |
| 20 Class                  |                                                                                                                   |
| 21 Spectrometer Frequency | 399.77                                                                                                            |
| 22 Spectral Width         | 8012.8                                                                                                            |
| 23 Lowest Frequency       | -2007.6                                                                                                           |
| 24 Nucleus                | 1H                                                                                                                |
| 25 Acquired Size          | 32768                                                                                                             |
| 26 Spectral Size          | 65536                                                                                                             |

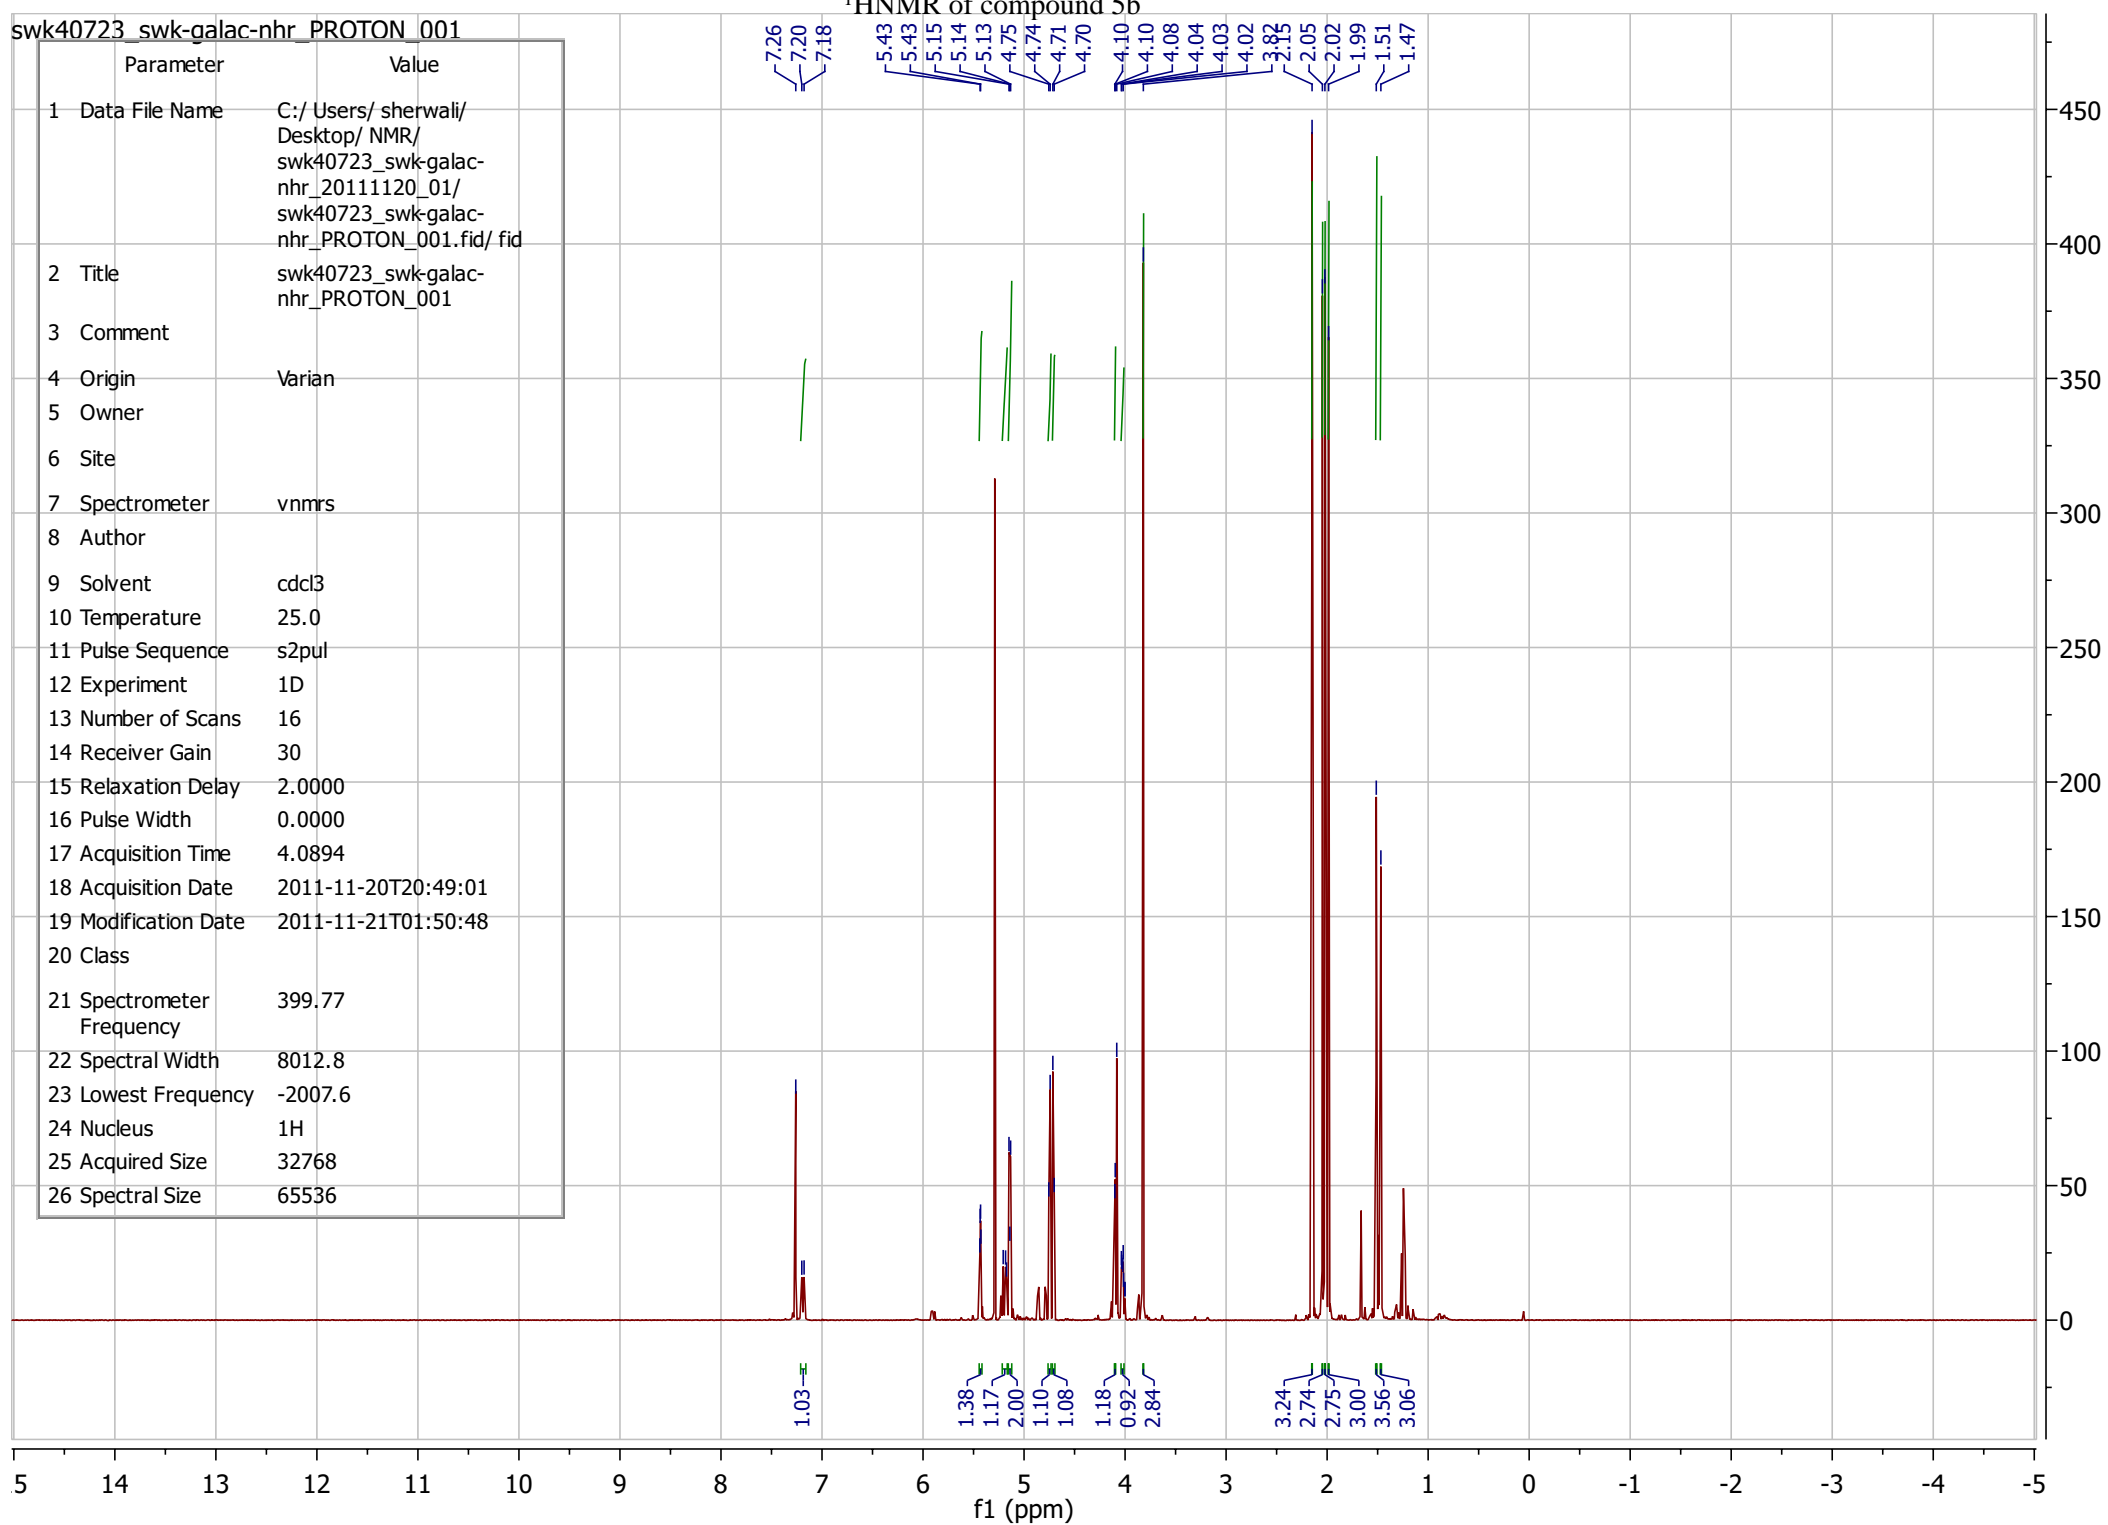

Supplement: f1 [file 9648710.f1.zip]
