# Supplementary material for: Synthesis, Characterization, X-Ray Crystallography, and Antileishmanial Activities of N-Linked and O-Linked Glycopyranosides
Source: Hindawi journal article supplement (doi:10.1155/2018/9648710), 2018-01-01
Supplement: f1 [file 9648710.f1.zip]

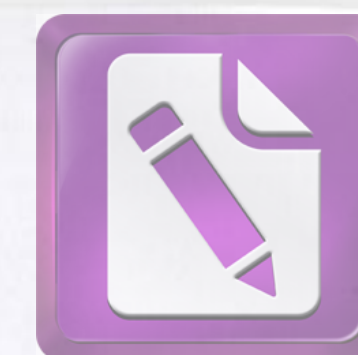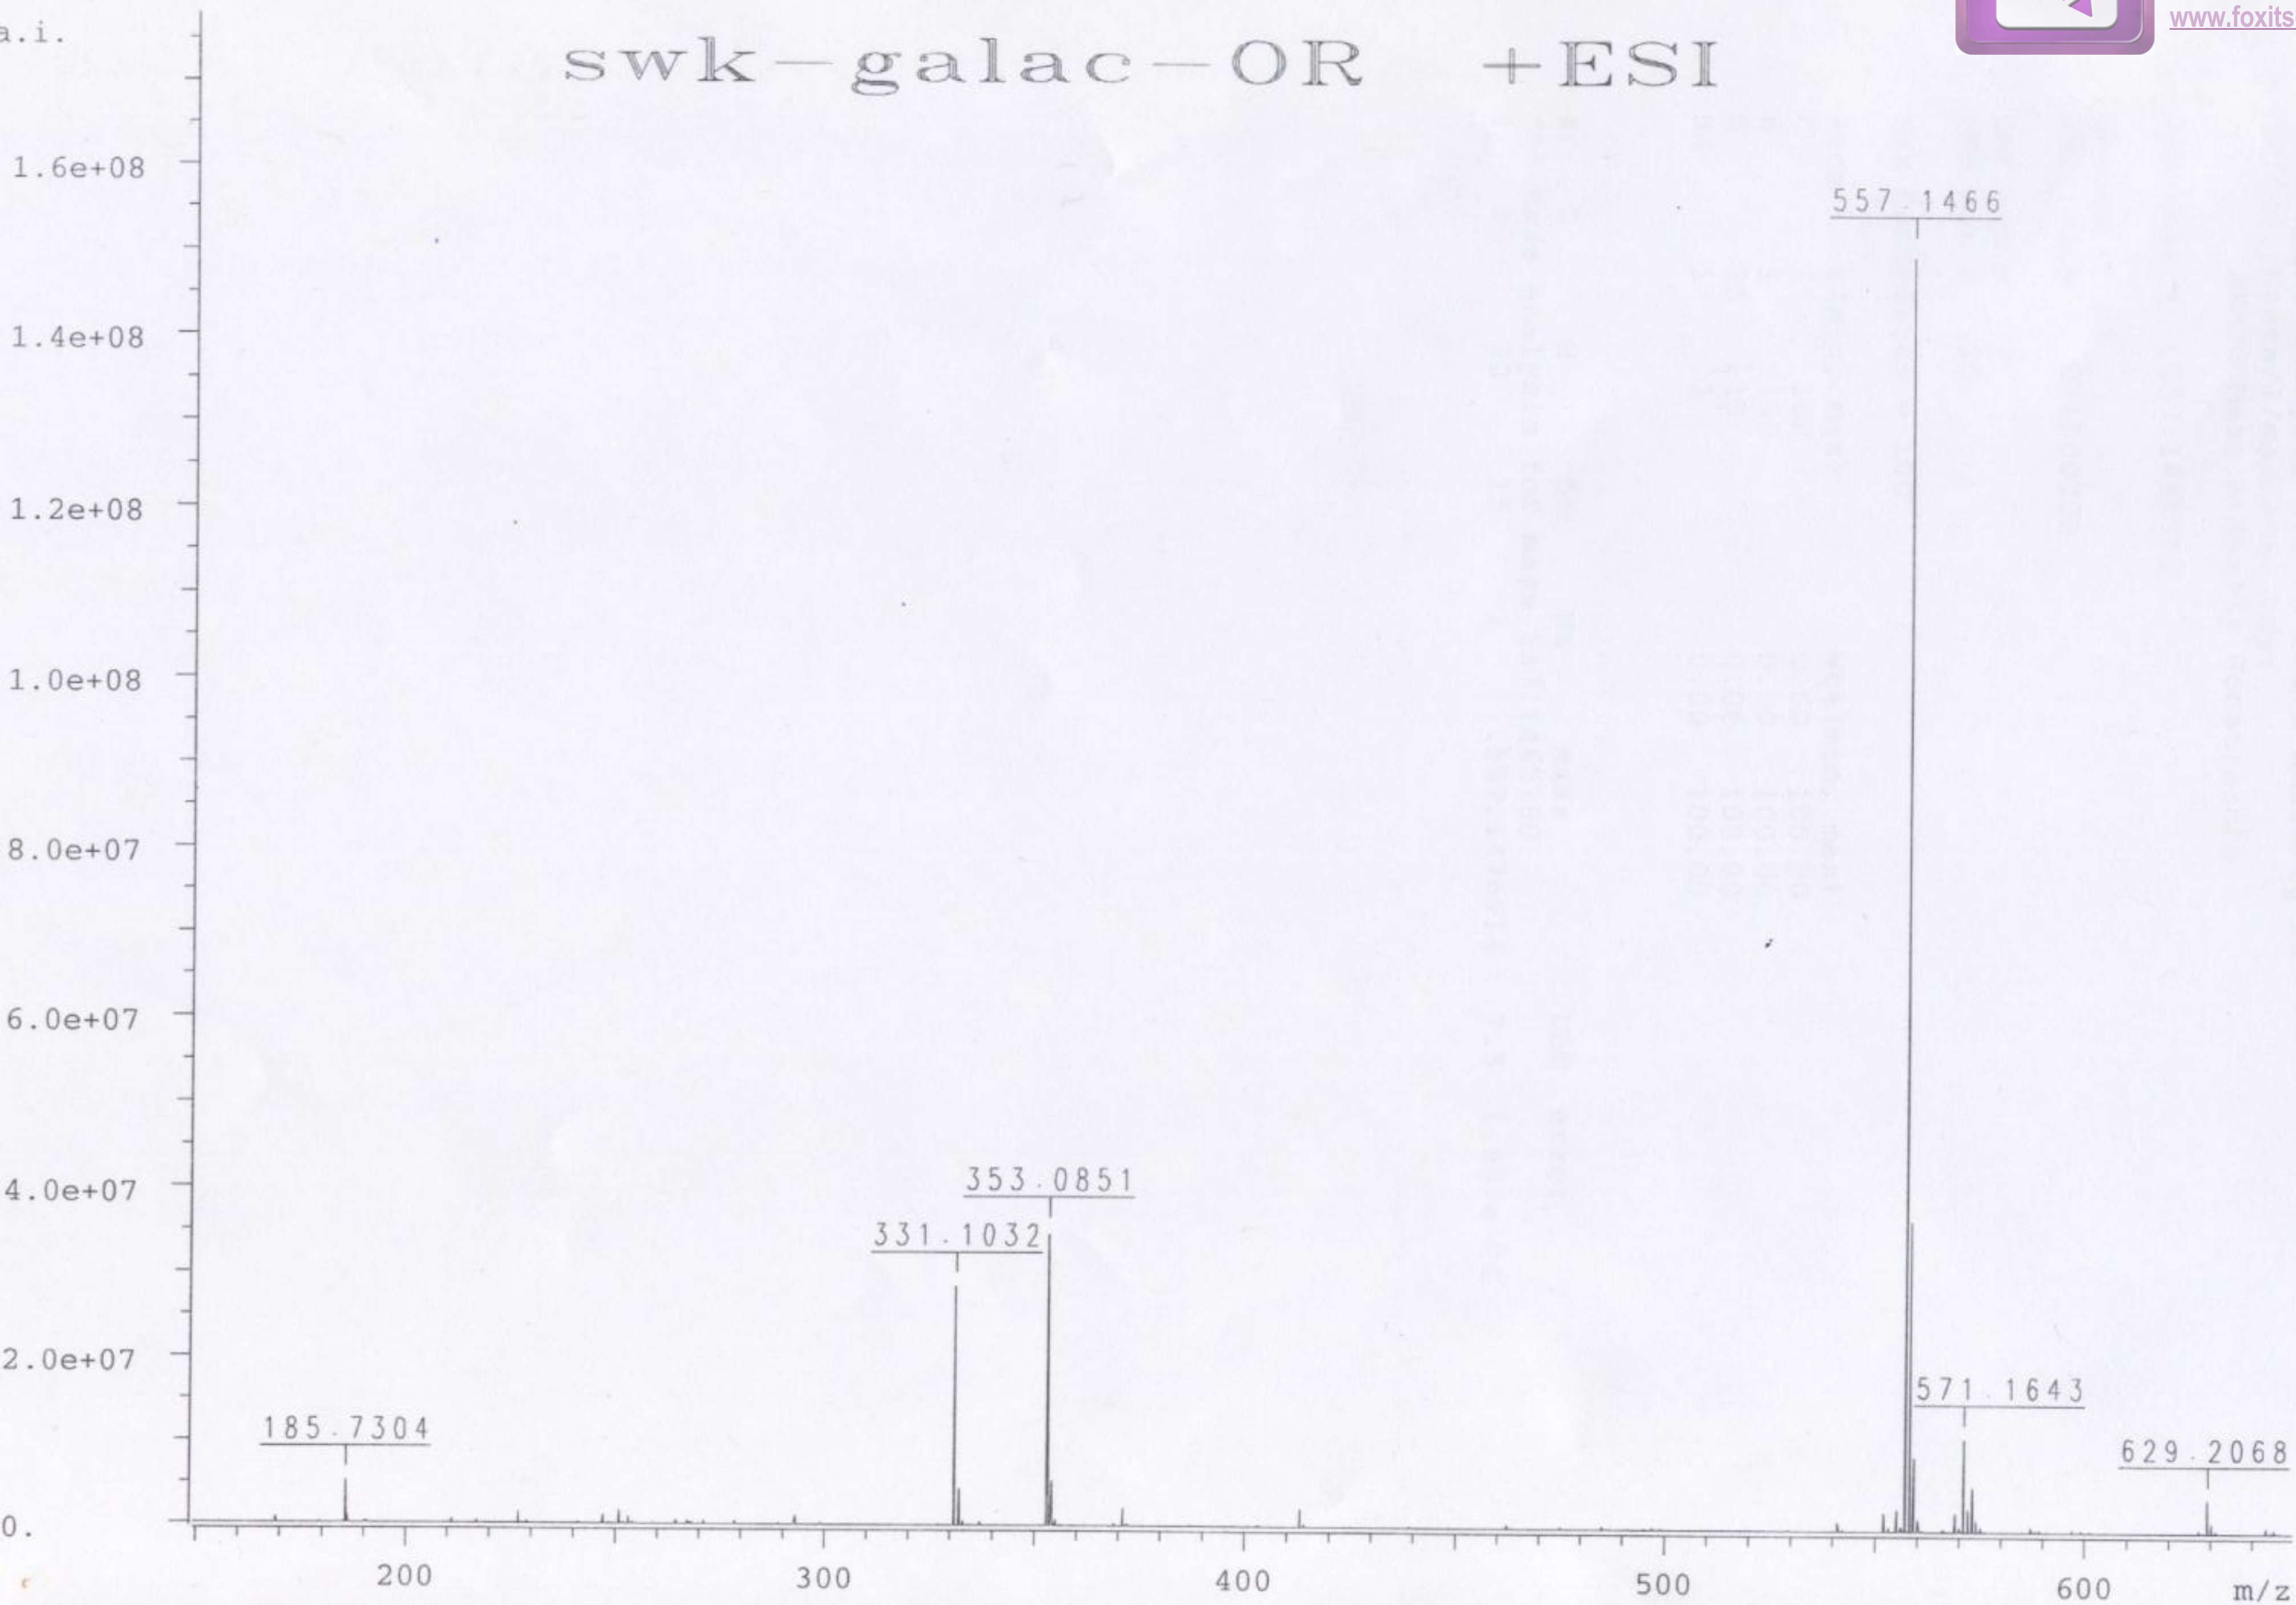

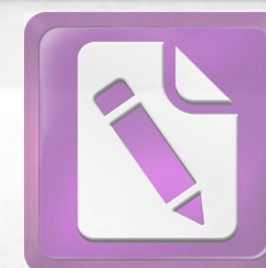

XMASS Mass Analysis for /D=/Data-Xmass/tg-sw-  
92285/1/pdata/1/massanal.res:

XMASS Mass Analysis Constraints

Ion mass = 557.1465790

Charge = +1

Tolerance = 0.1000000

DBE min = -2

DBE max = 20

Max Candidates = 100

| Atom | #(min, max) |     | Wt%(min, max) |        |
|------|-------------|-----|---------------|--------|
| C    | 1           | 100 | 0.00          | 100.00 |
| H    | 1           | 100 | 0.00          | 100.00 |
| O    | 15          | 15  | 0.00          | 100.00 |
| Na   | 1           | 1   | 0.00          | 100.00 |

| #                                      | C  | H  | O  | Na | mass        | DBE | error     |
|----------------------------------------|----|----|----|----|-------------|-----|-----------|
| *** Mass Analysis for mass 557.1465790 |    |    |    |    |             |     |           |
| 1                                      | 22 | 30 | 15 | 1  | 557.1476914 | 7.5 | 1.997e-06 |
