# Supplementary material for: Synthesis, Characterization, X-Ray Crystallography, and Antileishmanial Activities of N-Linked and O-Linked Glycopyranosides
Source: Hindawi journal article supplement (doi:10.1155/2018/9648710), 2018-01-01
Supplement: f1 [file 9648710.f1.zip]

Archive with 45 entries (35 files):
- 9648710.f1/
- 9648710.f1/5a/
- 9648710.f1/5a/13CNMR, compound 5a.pdf
- 9648710.f1/5a/1HNMR, compound 5a.pdf
- 9648710.f1/5a/ESI-MS, compound 5a.pdf
- 9648710.f1/5a/FT-IR, compound 5a.pdf
- 9648710.f1/5b/
- 9648710.f1/5b/13CNMR, 5b.pdf
- 9648710.f1/5b/1HNMR, 5b.pdf
- 9648710.f1/5b/ESI-MS, 5b.pdf
- 9648710.f1/5c/
- 9648710.f1/5c/13CNMR, Compound 5c.pdf
- 9648710.f1/5c/1HNMR, compound 5c.pdf
- 9648710.f1/5d/
- 9648710.f1/5d/13CNMR, compound 5d.pdf
- 9648710.f1/5d/1HNMR, compound 5d.pdf
- 9648710.f1/5d/MS, compound 5d.pdf
- 9648710.f1/7a/
- 9648710.f1/7a/13CNMR, compound 7a.pdf
- 9648710.f1/7a/13CNMR, compound 7a.png
- 9648710.f1/7a/1HNMR, compound 7a.pdf
- 9648710.f1/7a/1HNMR, compound 7a.png
- 9648710.f1/7a/MS, compound 7a.jpg
- 9648710.f1/7a/MS, compound 7a.pdf
- 9648710.f1/7b/
- 9648710.f1/7b/13CNMR, compound 7b.pdf
- 9648710.f1/7b/1HNMR, compound 7b.pdf
- 9648710.f1/7b/ESI-MS, compound 7b backup.pdf
- 9648710.f1/7b/ESI-MS, compound 7b.pdf
- 9648710.f1/7b/sw1a.pdf
- 9648710.f1/7c/
- 9648710.f1/7c/13CNMR compound 7c,new.pdf
- 9648710.f1/7c/13CNMR, compound 7c.pdf
- 9648710.f1/7c/1HNMR, compound 7c, new.pdf
- 9648710.f1/7c/1HNMR, compound 7c.pdf
- 9648710.f1/7c/ESI-MS, compound, 7c.pdf
- 9648710.f1/7c/Mass analysis of compound 7c.pdf
- 9648710.f1/7d/
- 9648710.f1/7d/13CNMR of compound 7d.pdf
- 9648710.f1/7d/1HNMR of compound 7d.pdf
- 9648710.f1/7d/ESI-MS of compound 7d.pdf
- 9648710.f1/7d/Mass analysis of compound 7d.pdf
- 9648710.f1/7e/
- 9648710.f1/7e/13CNMR of compound 7e.pdf
- 9648710.f1/7e/1HNMR of compound 7e.pdf
