# Supplementary figures and images for: Synthesis, Characterization, X-Ray Crystallography, and Antileishmanial Activities of N-Linked and O-Linked Glycopyranosides
Source: Hindawi journal article supplement (doi:10.1155/2018/9648710), 2018-01-01

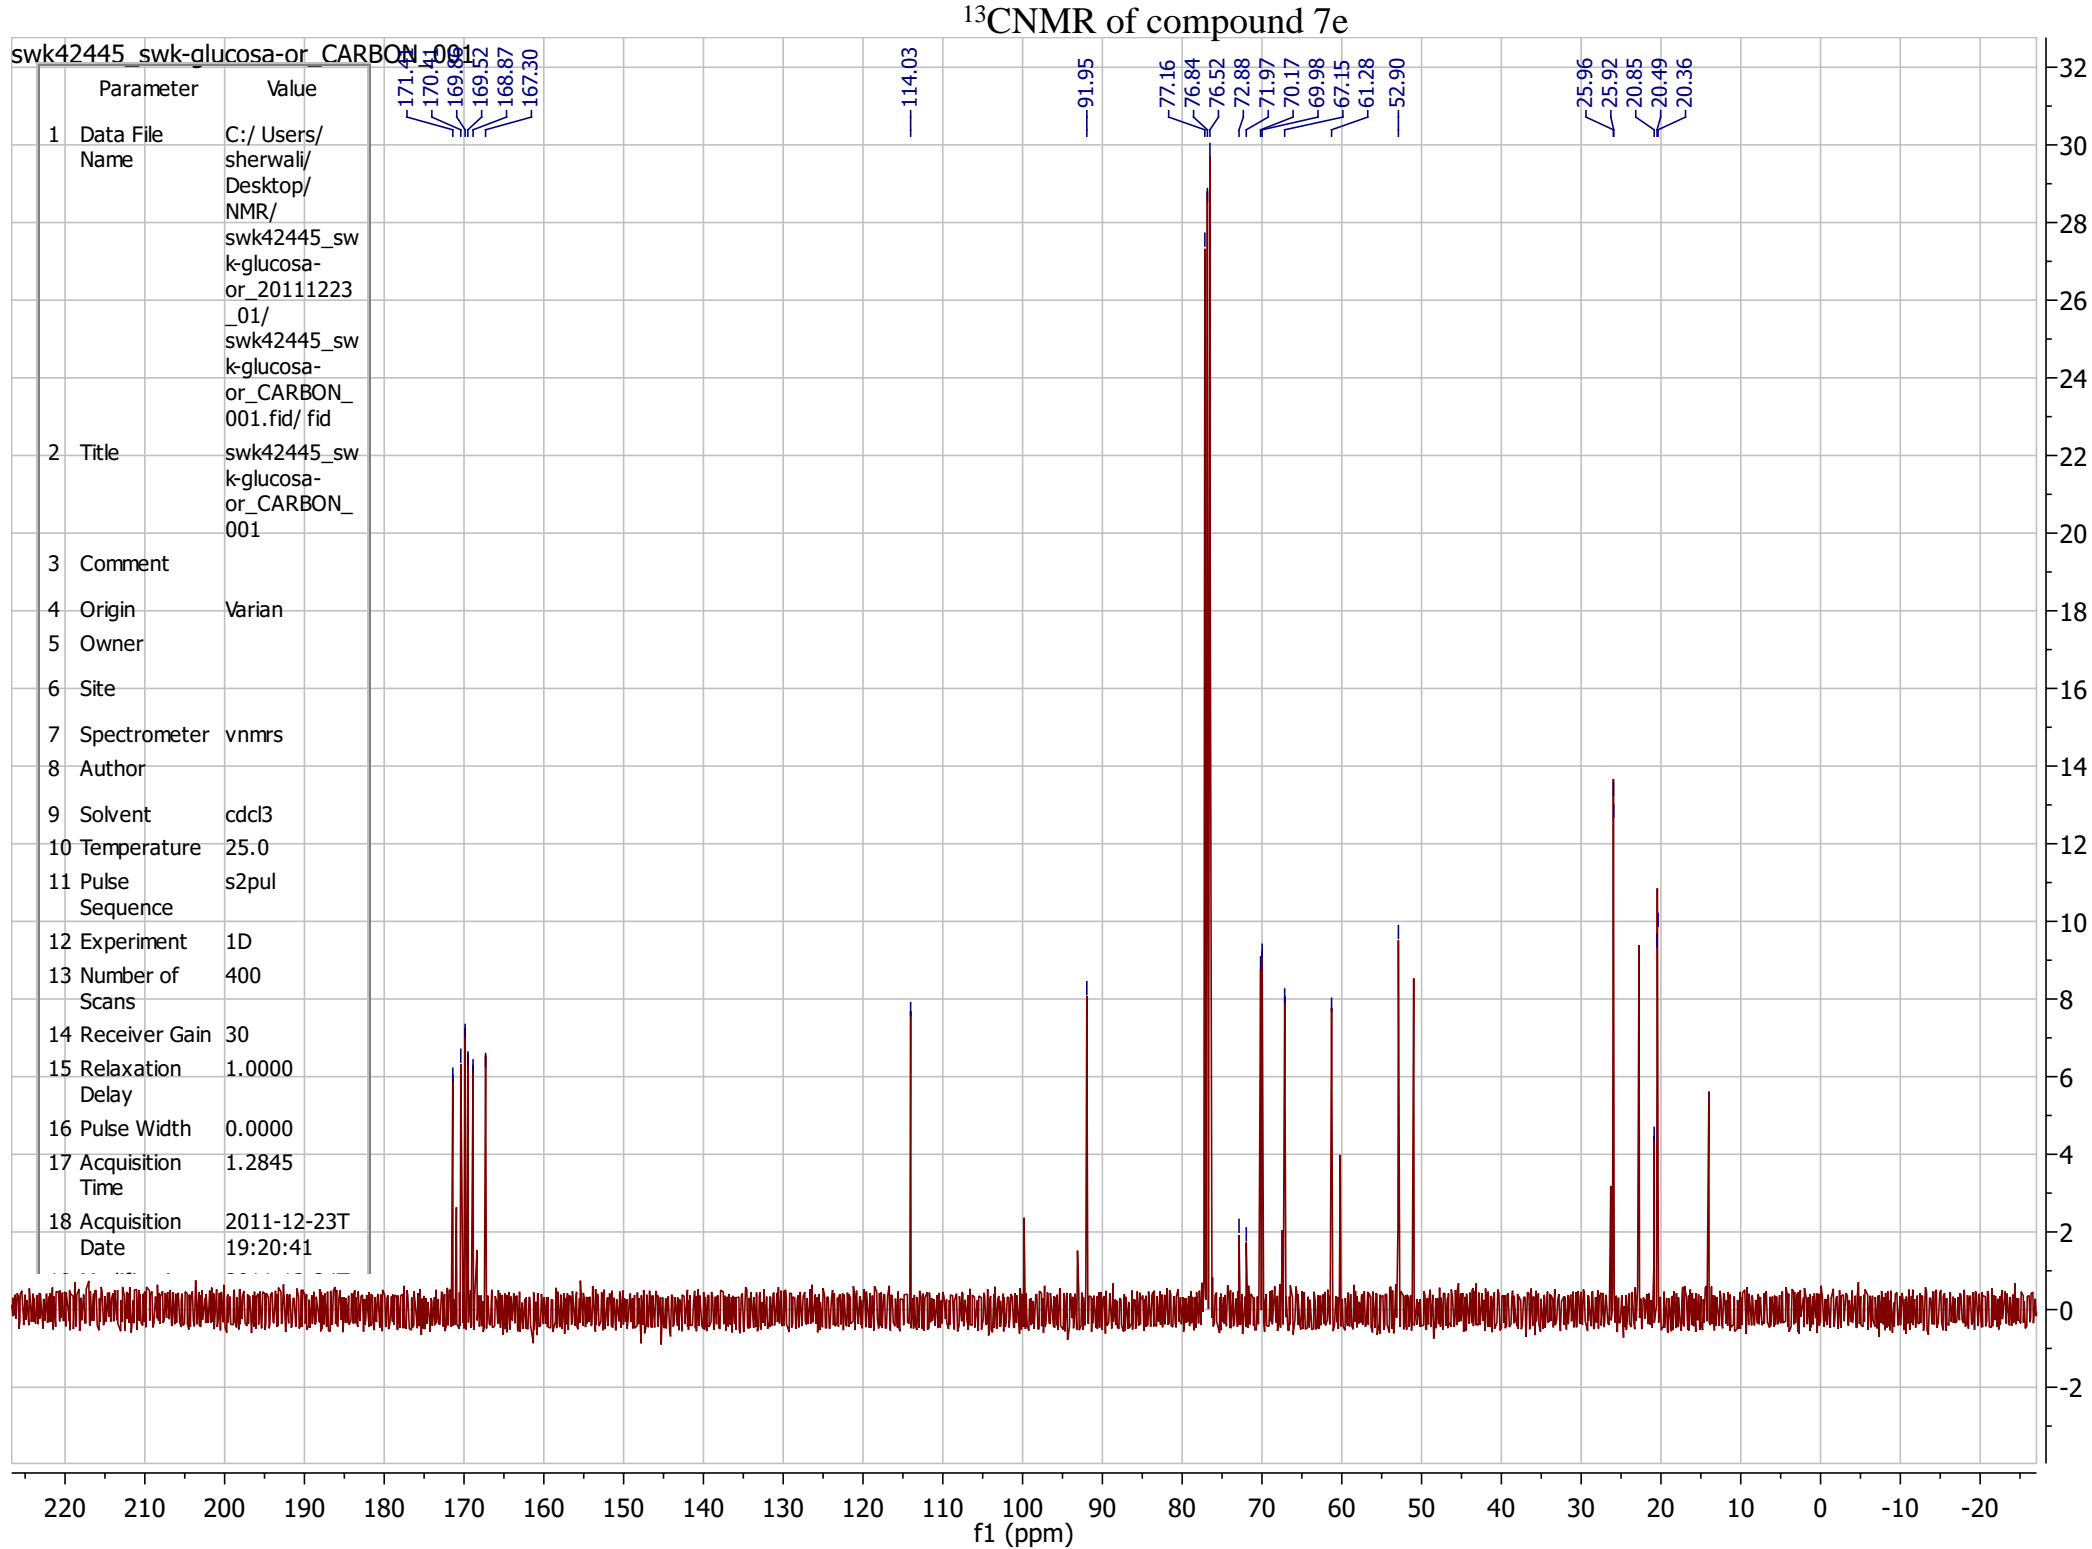

Supplement: f1 [file 9648710.f1.zip]

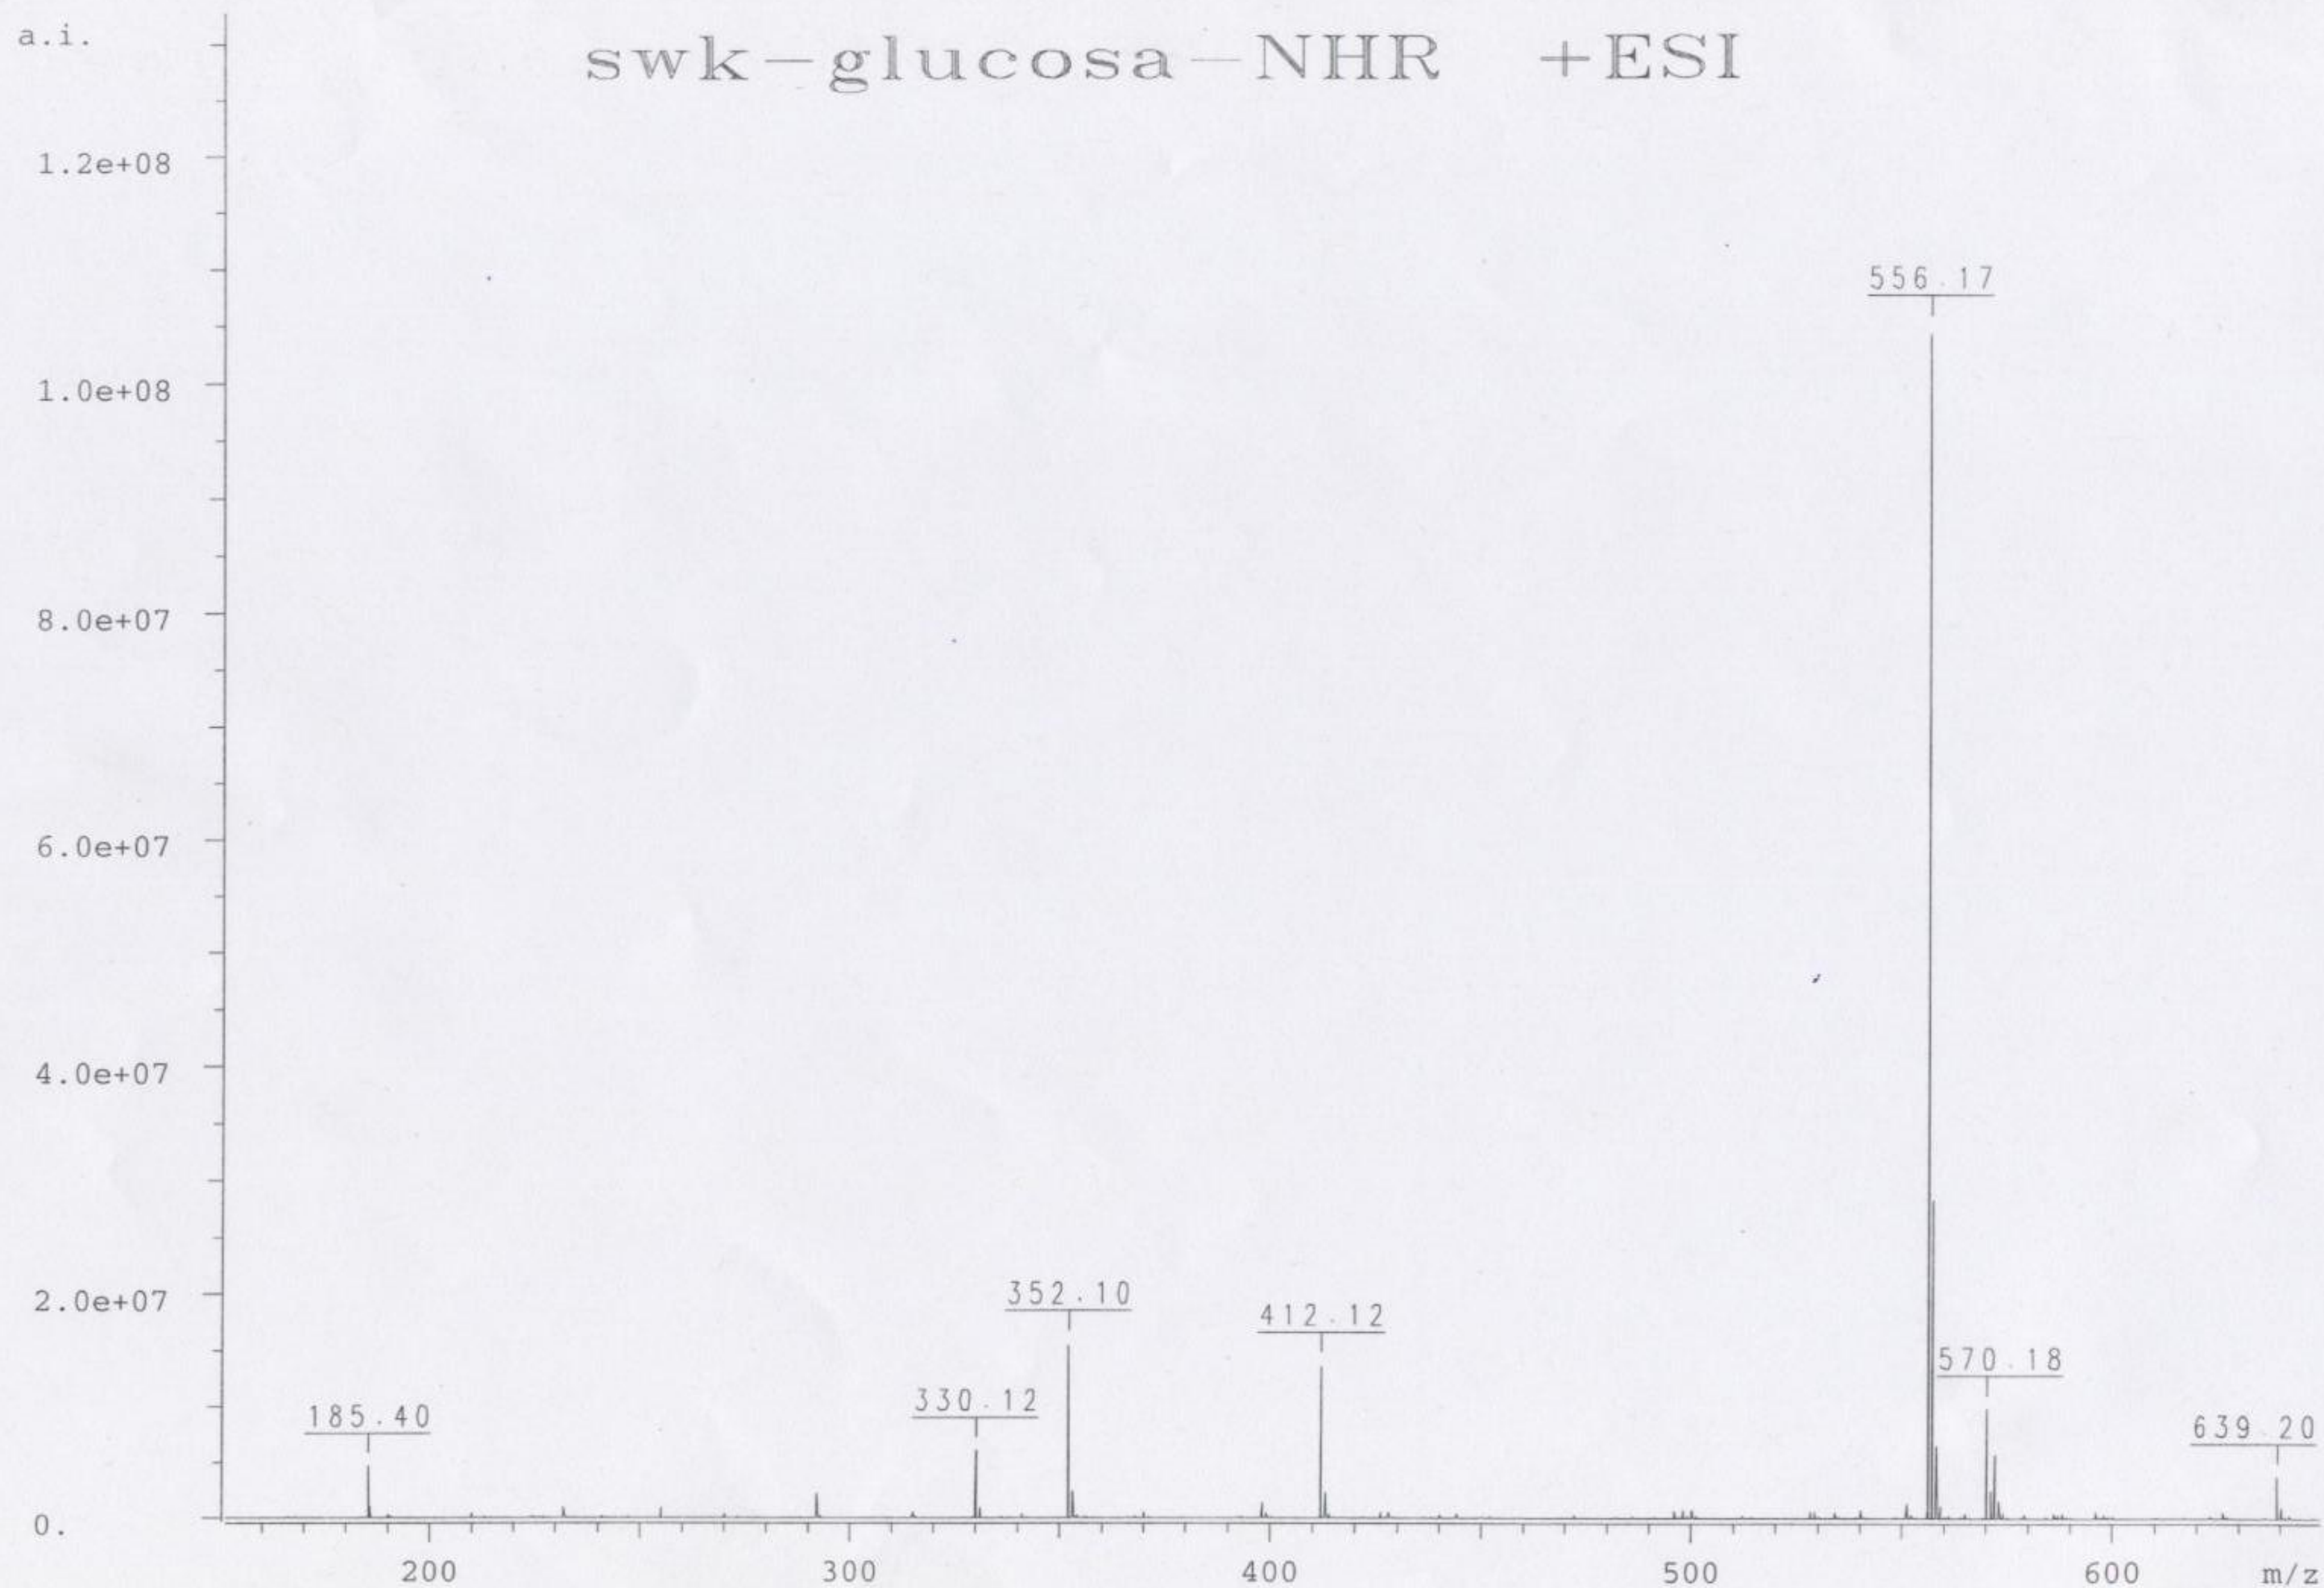

Supplement: f1 [file 9648710.f1.zip]

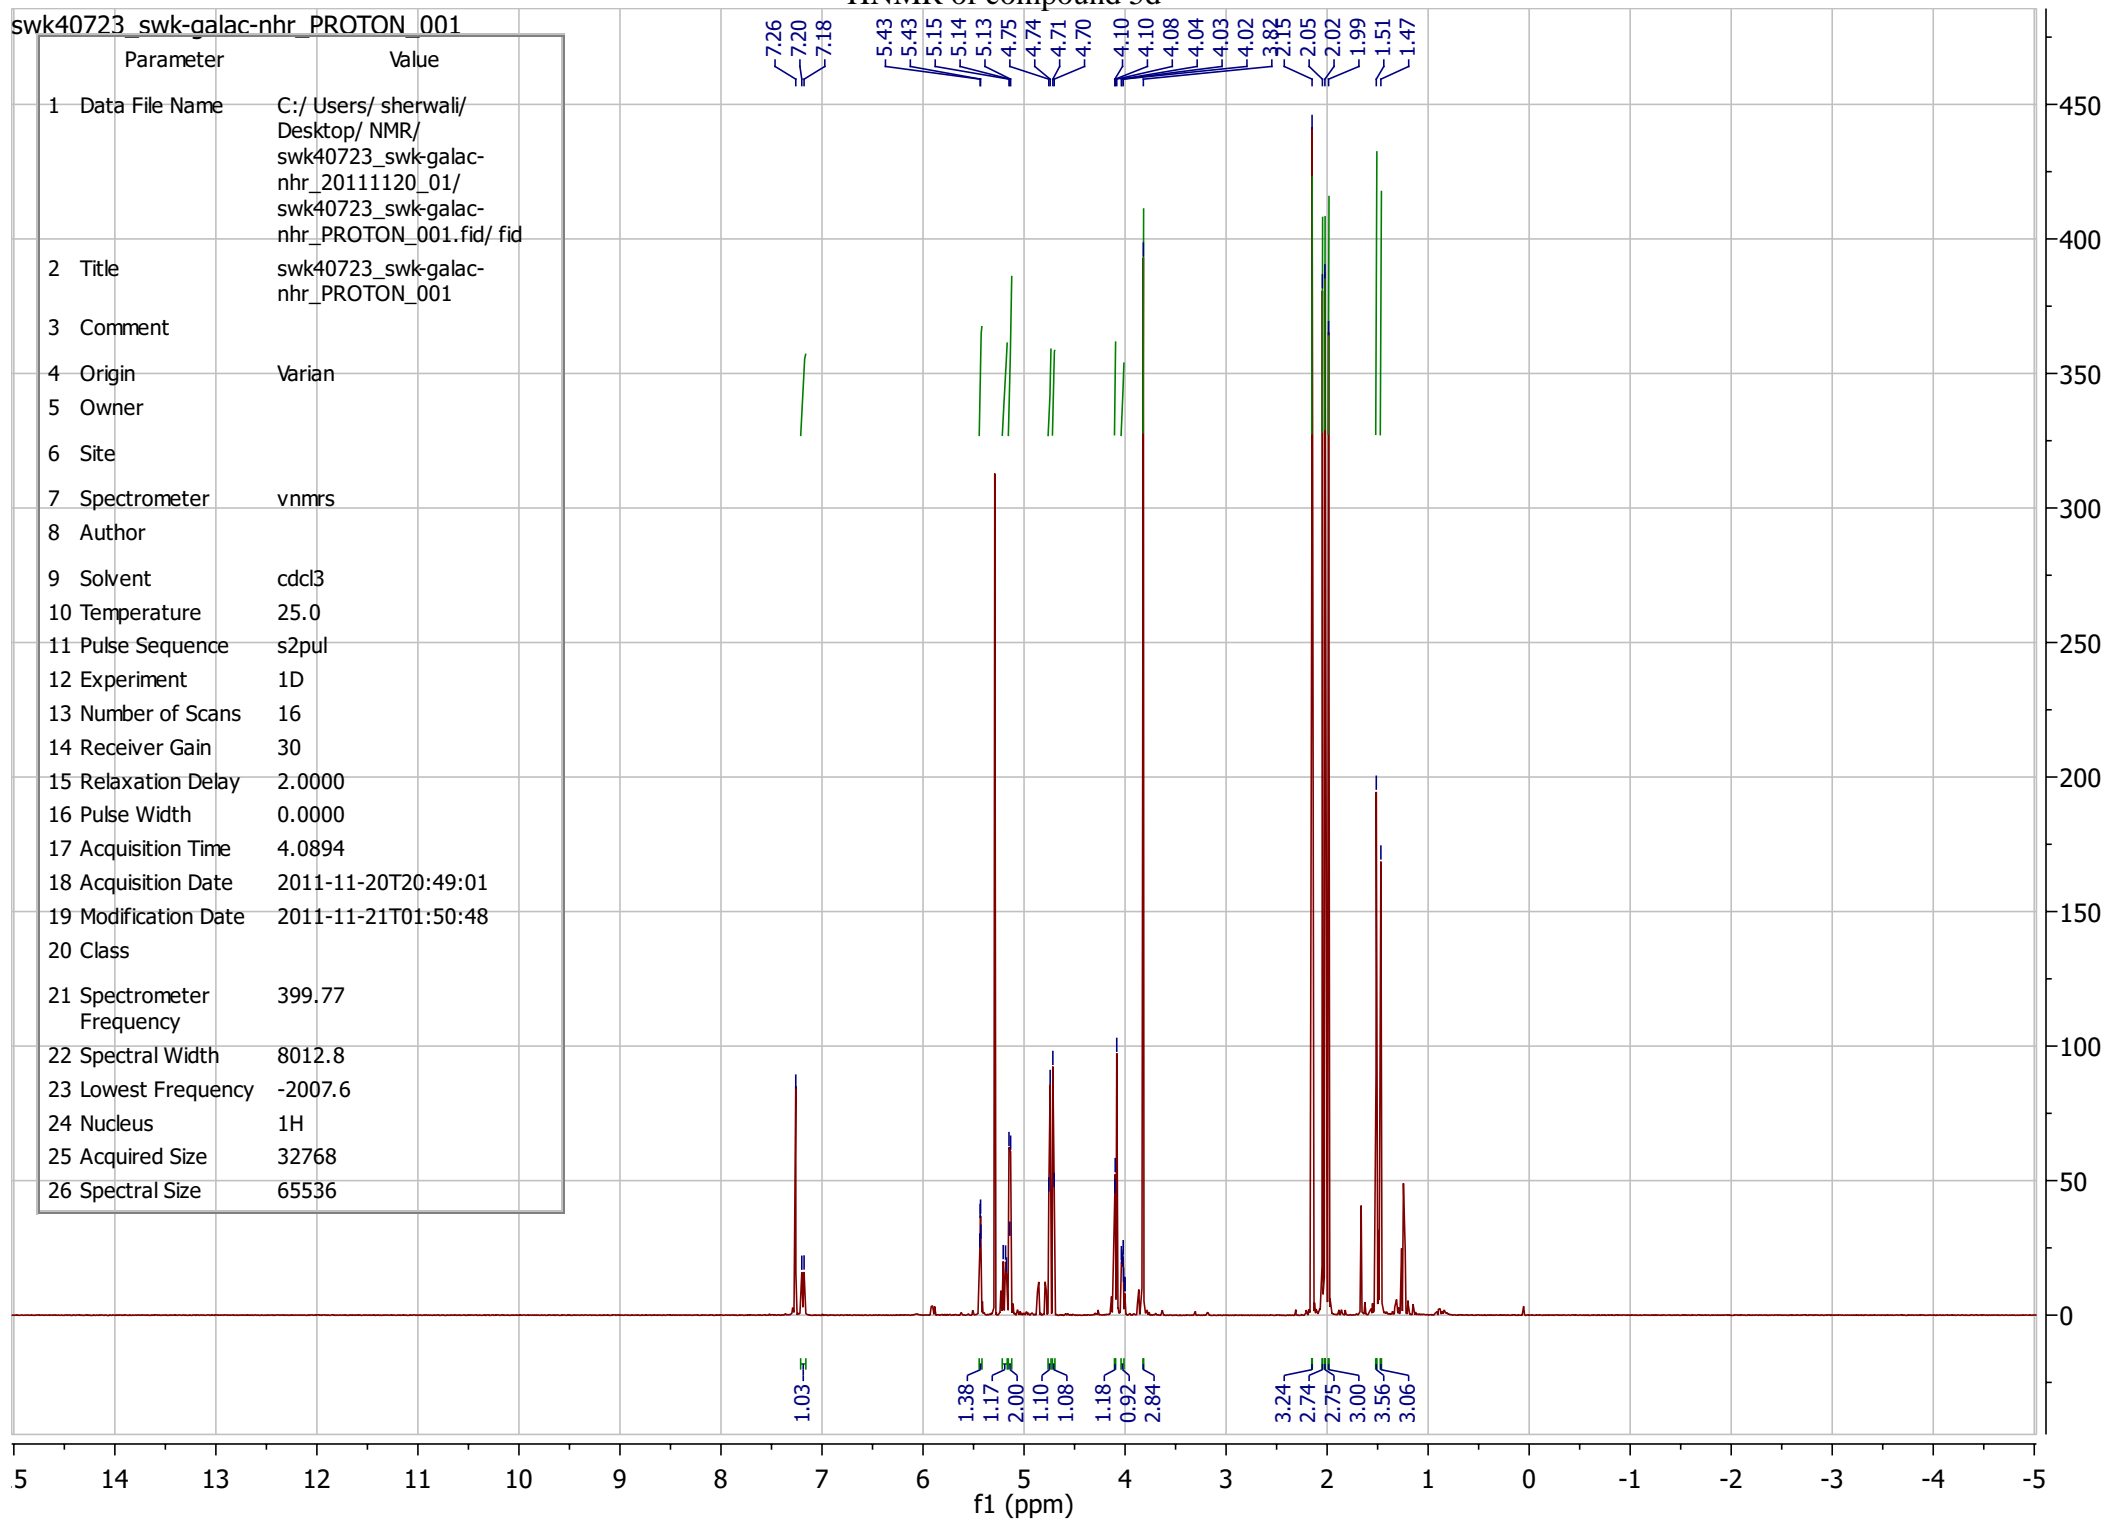

Supplement: f1 [file 9648710.f1.zip]

## SWK-Glc-NHR + ESI

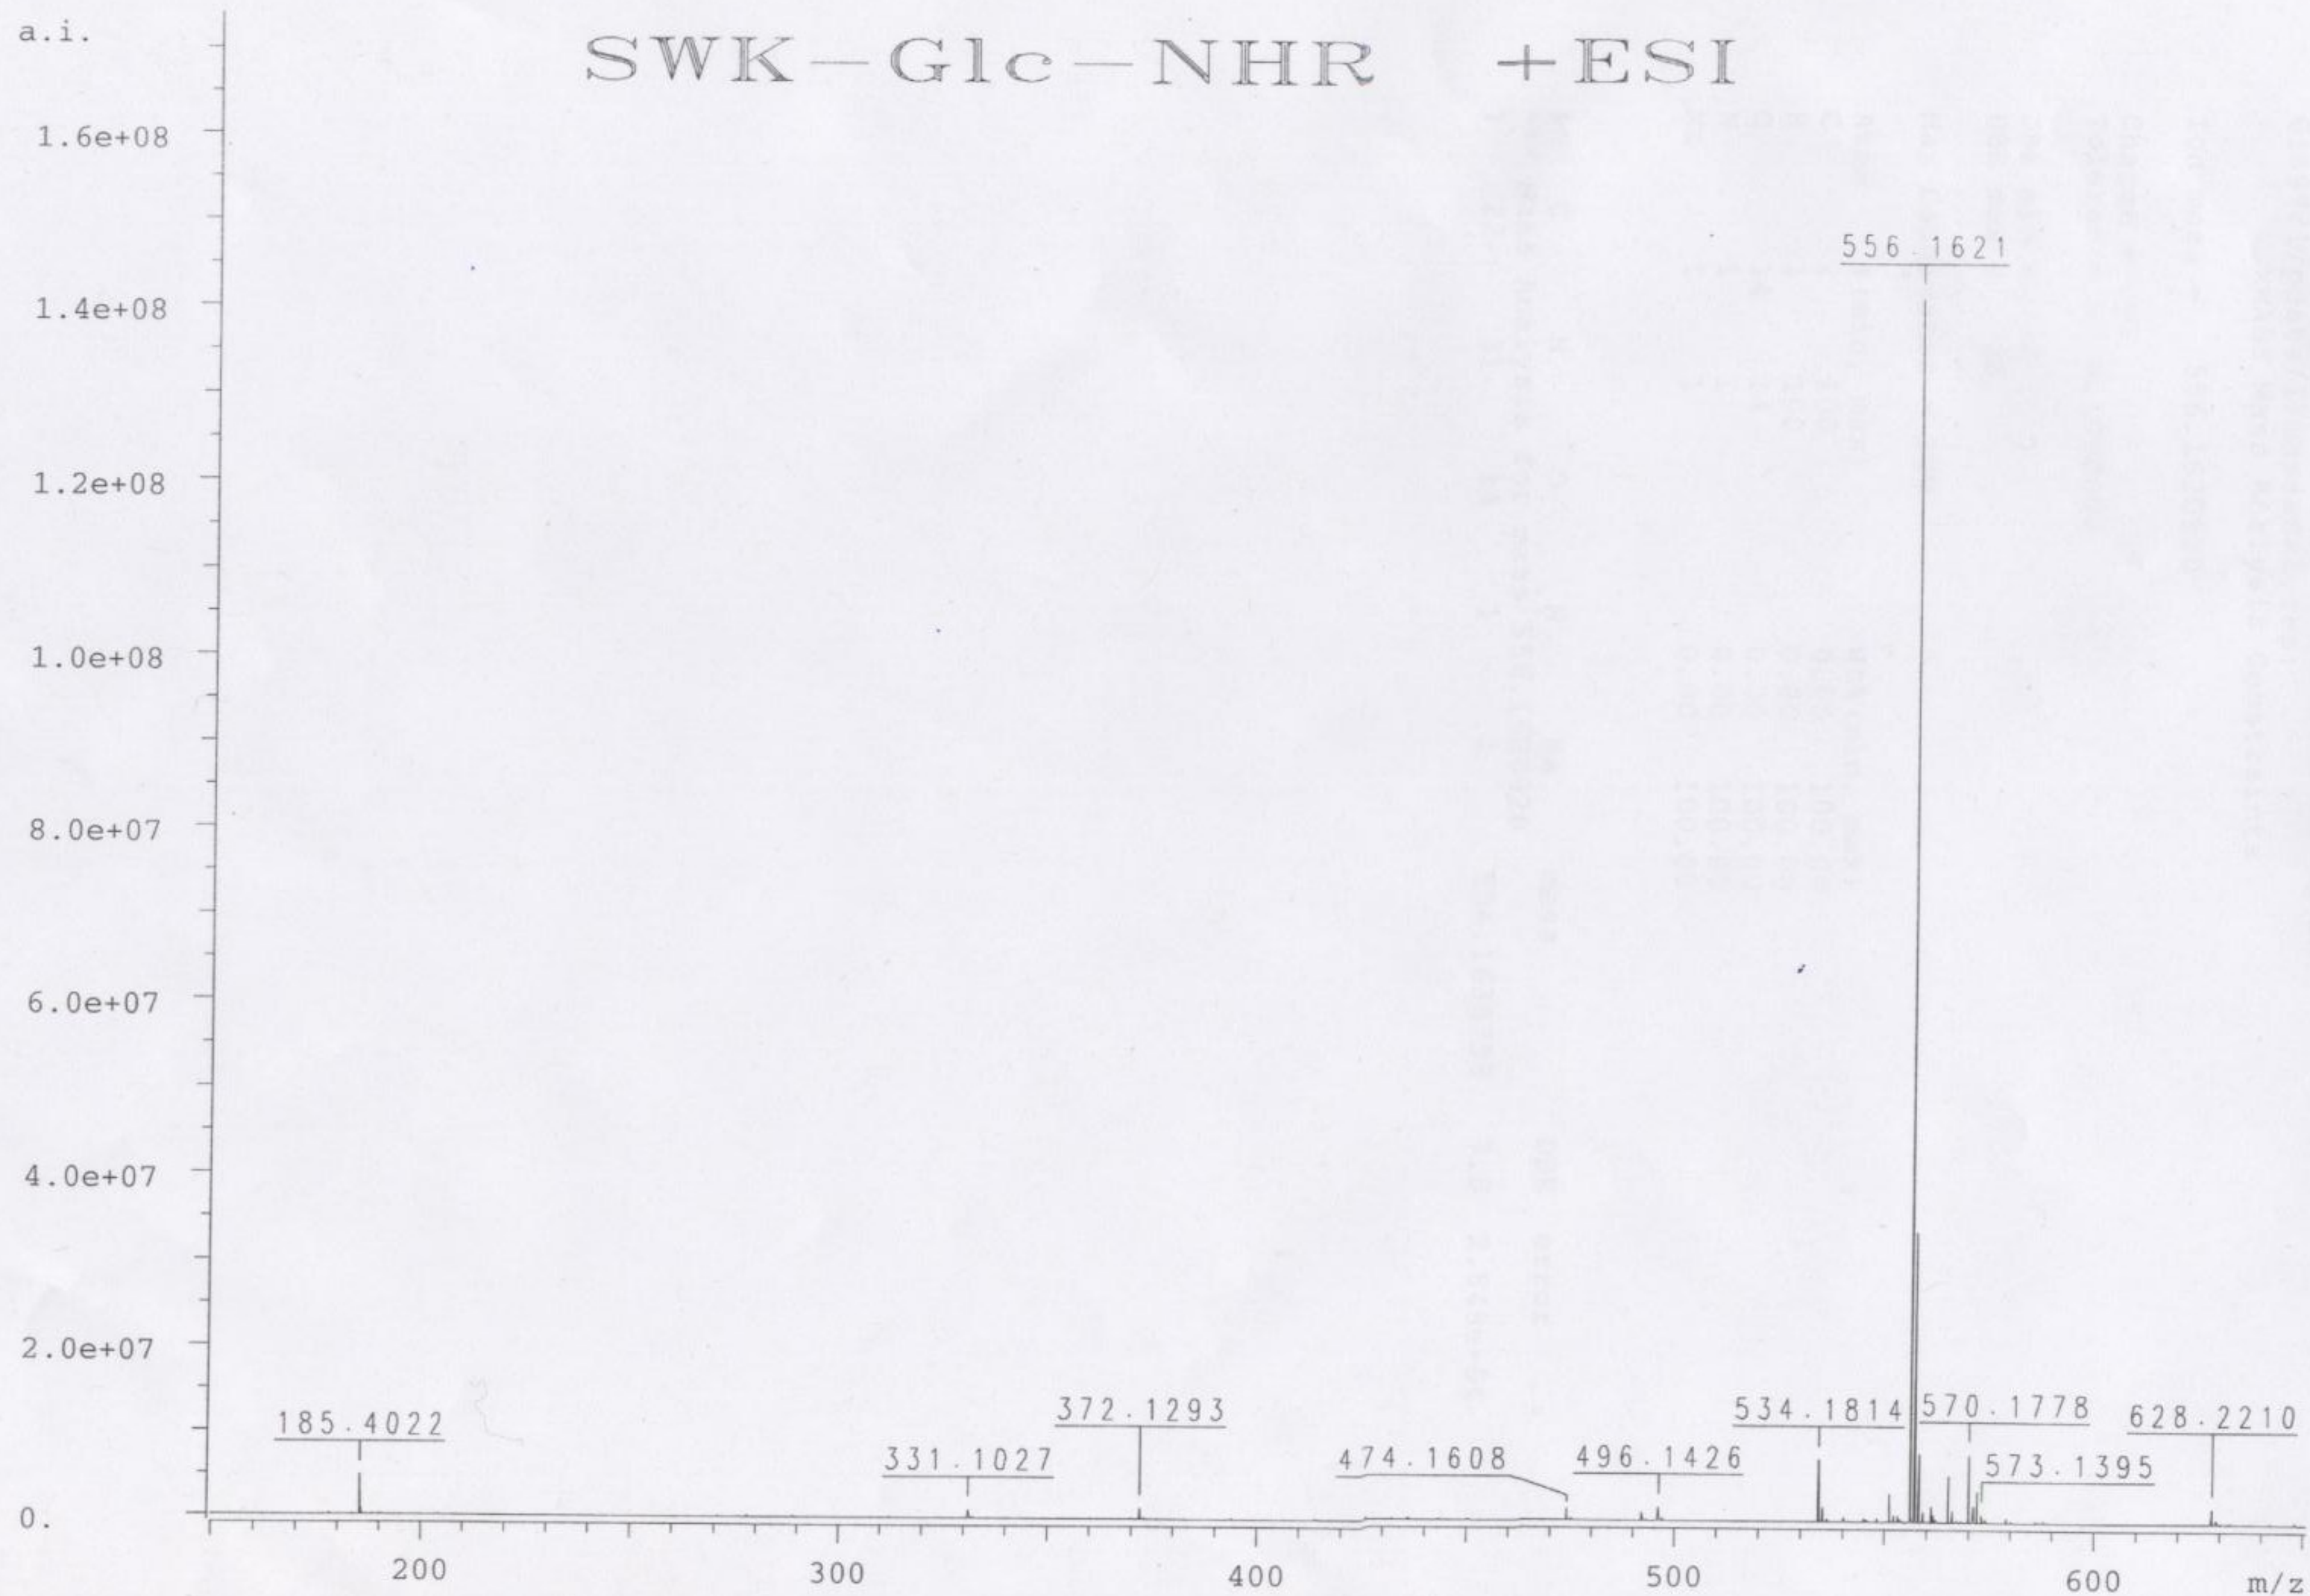

Supplement: f1 [file 9648710.f1.zip]

<sup>13</sup>CNMR of compound 5a

swk39955\_swk-glc-nhr\_CARBON\_003

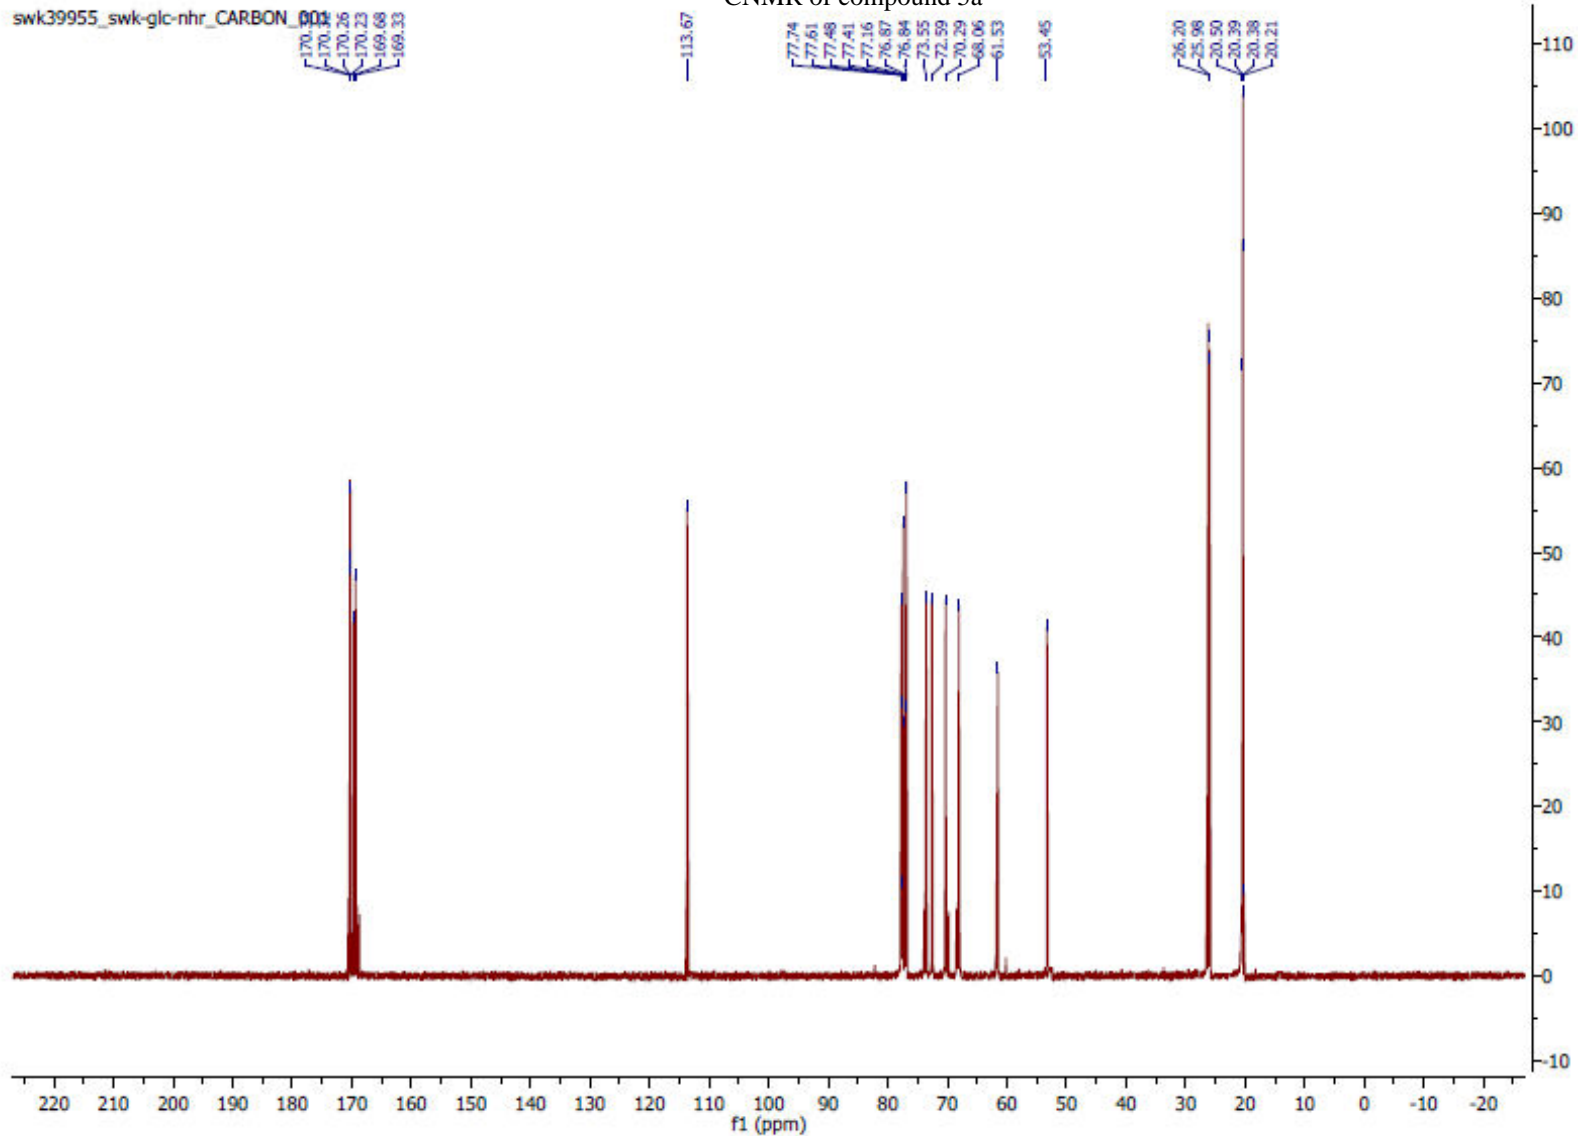

Supplement: f1 [file 9648710.f1.zip]

# <sup>1</sup>HNMR of compound 7c

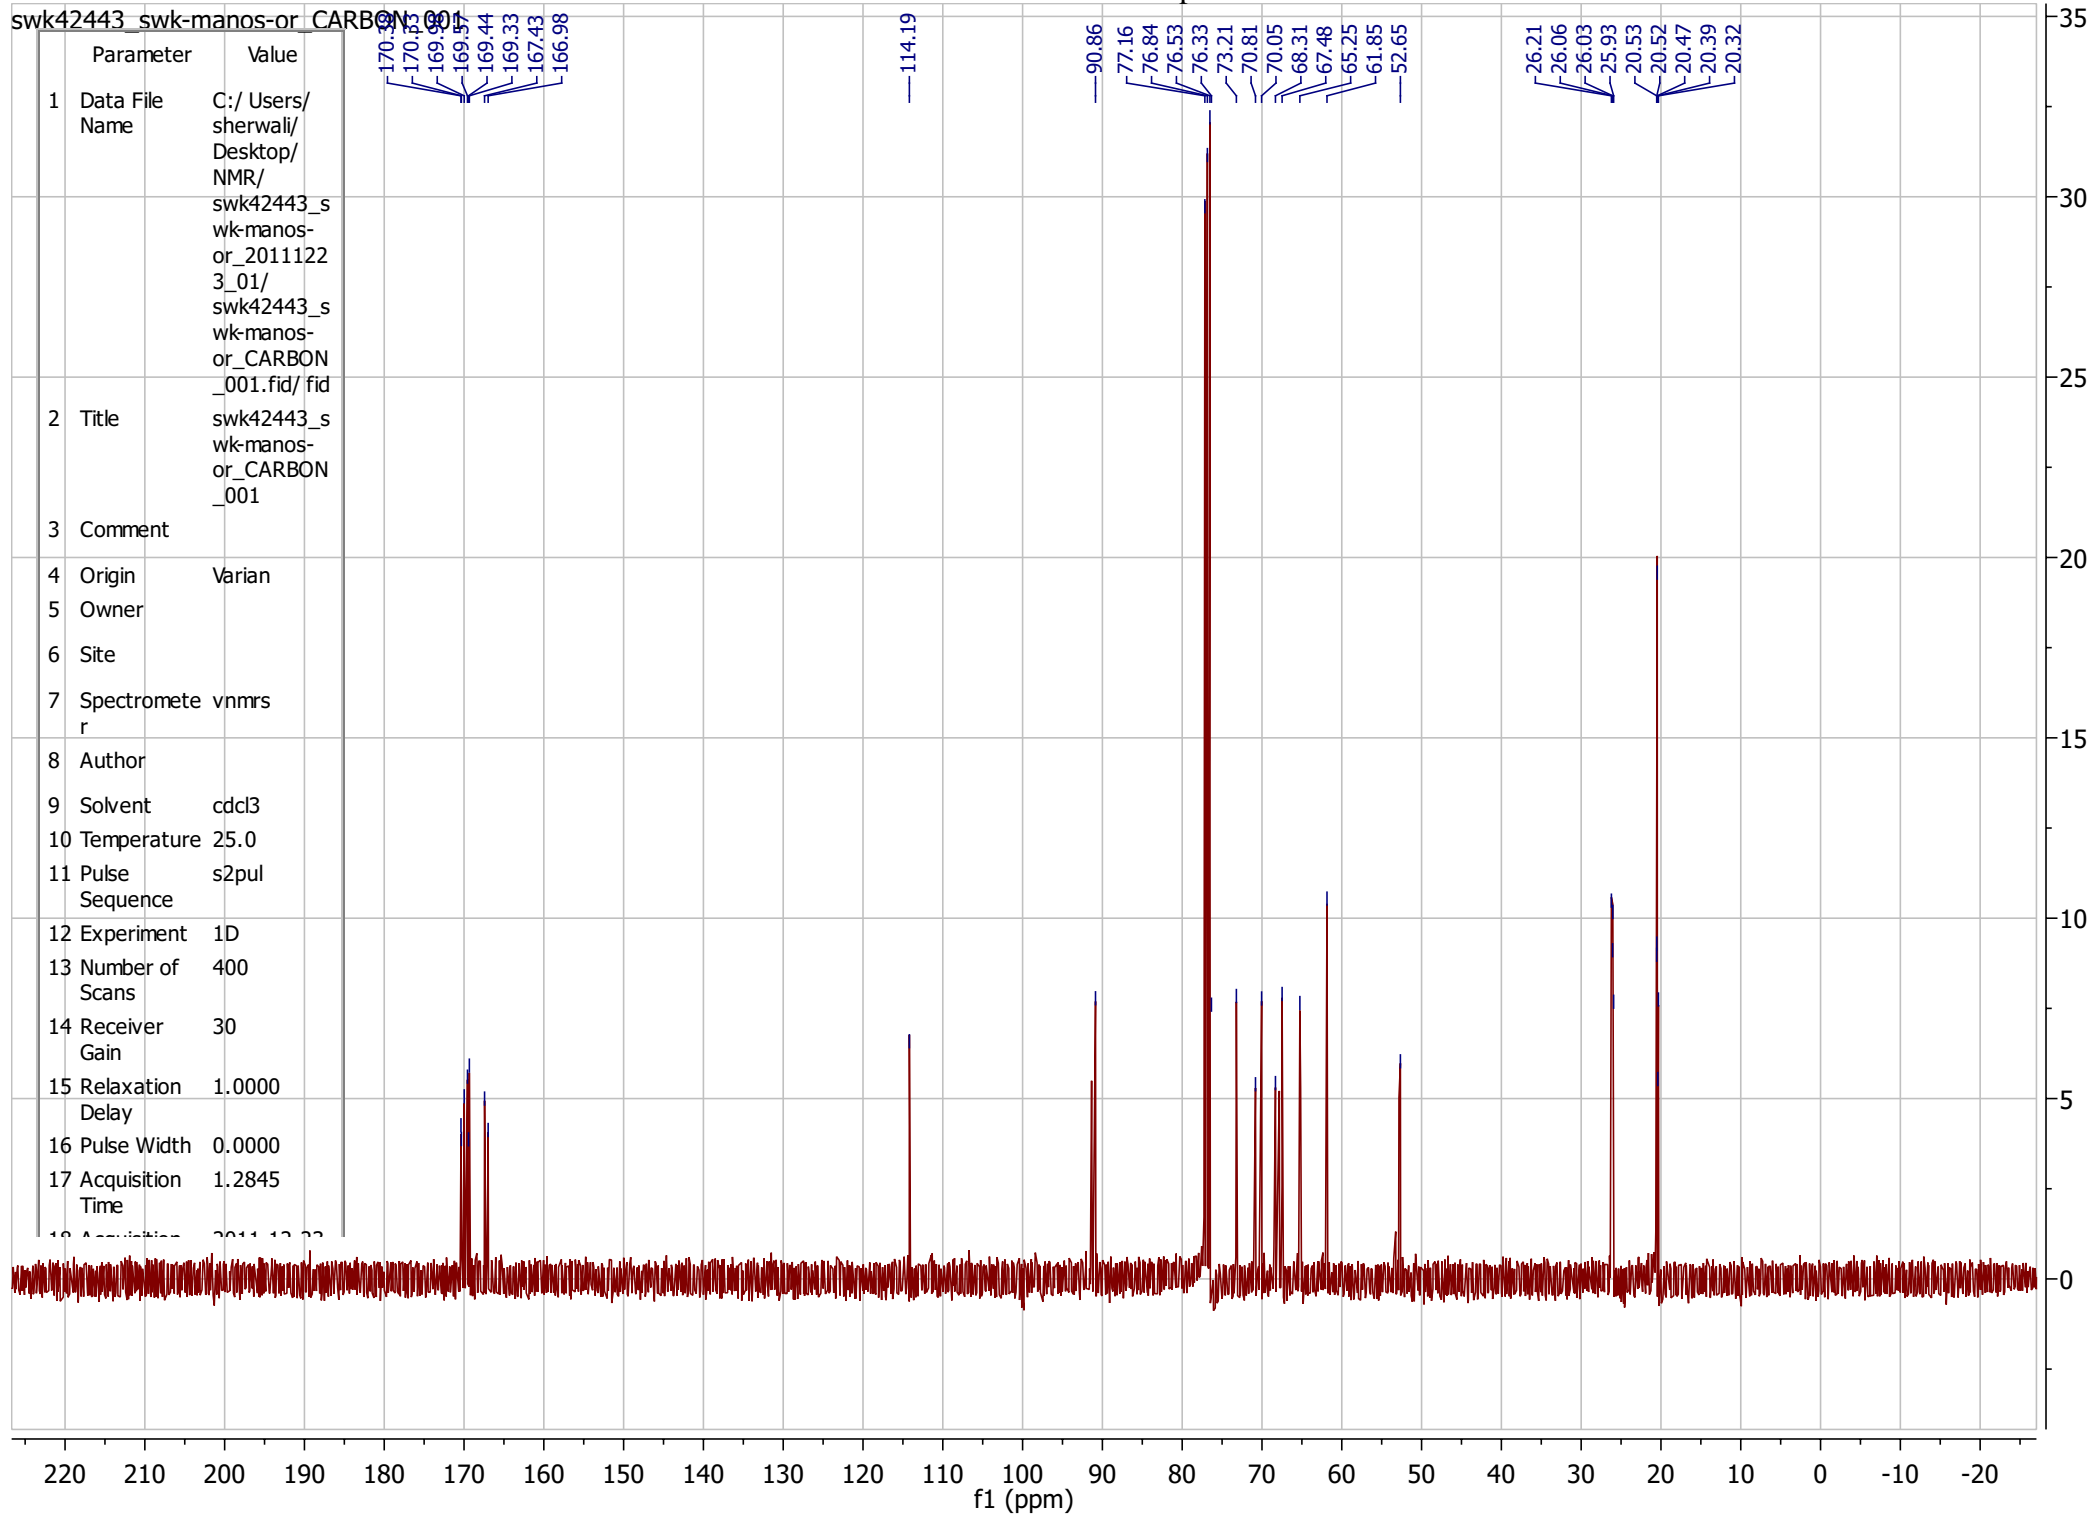

Supplement: f1 [file 9648710.f1.zip]

<sup>13</sup>CNMR of compound 5c

swk39955\_swk-glc-nhr\_CARBON\_003

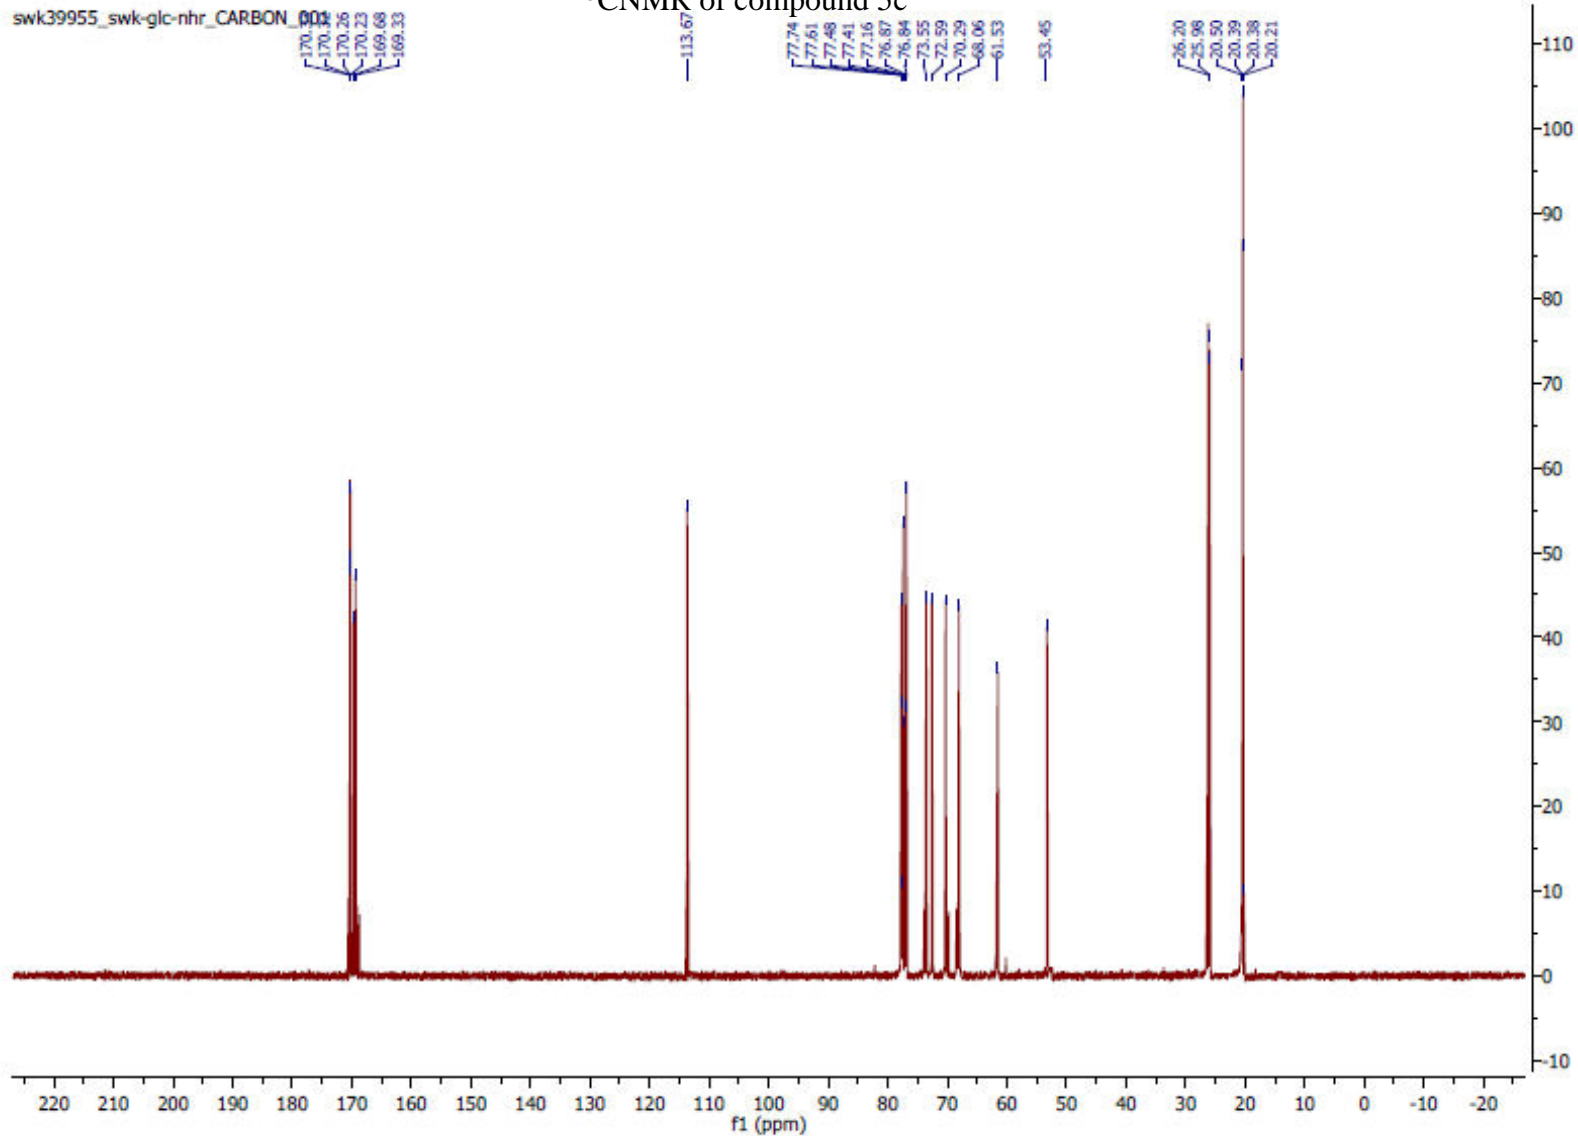

Supplement: f1 [file 9648710.f1.zip]

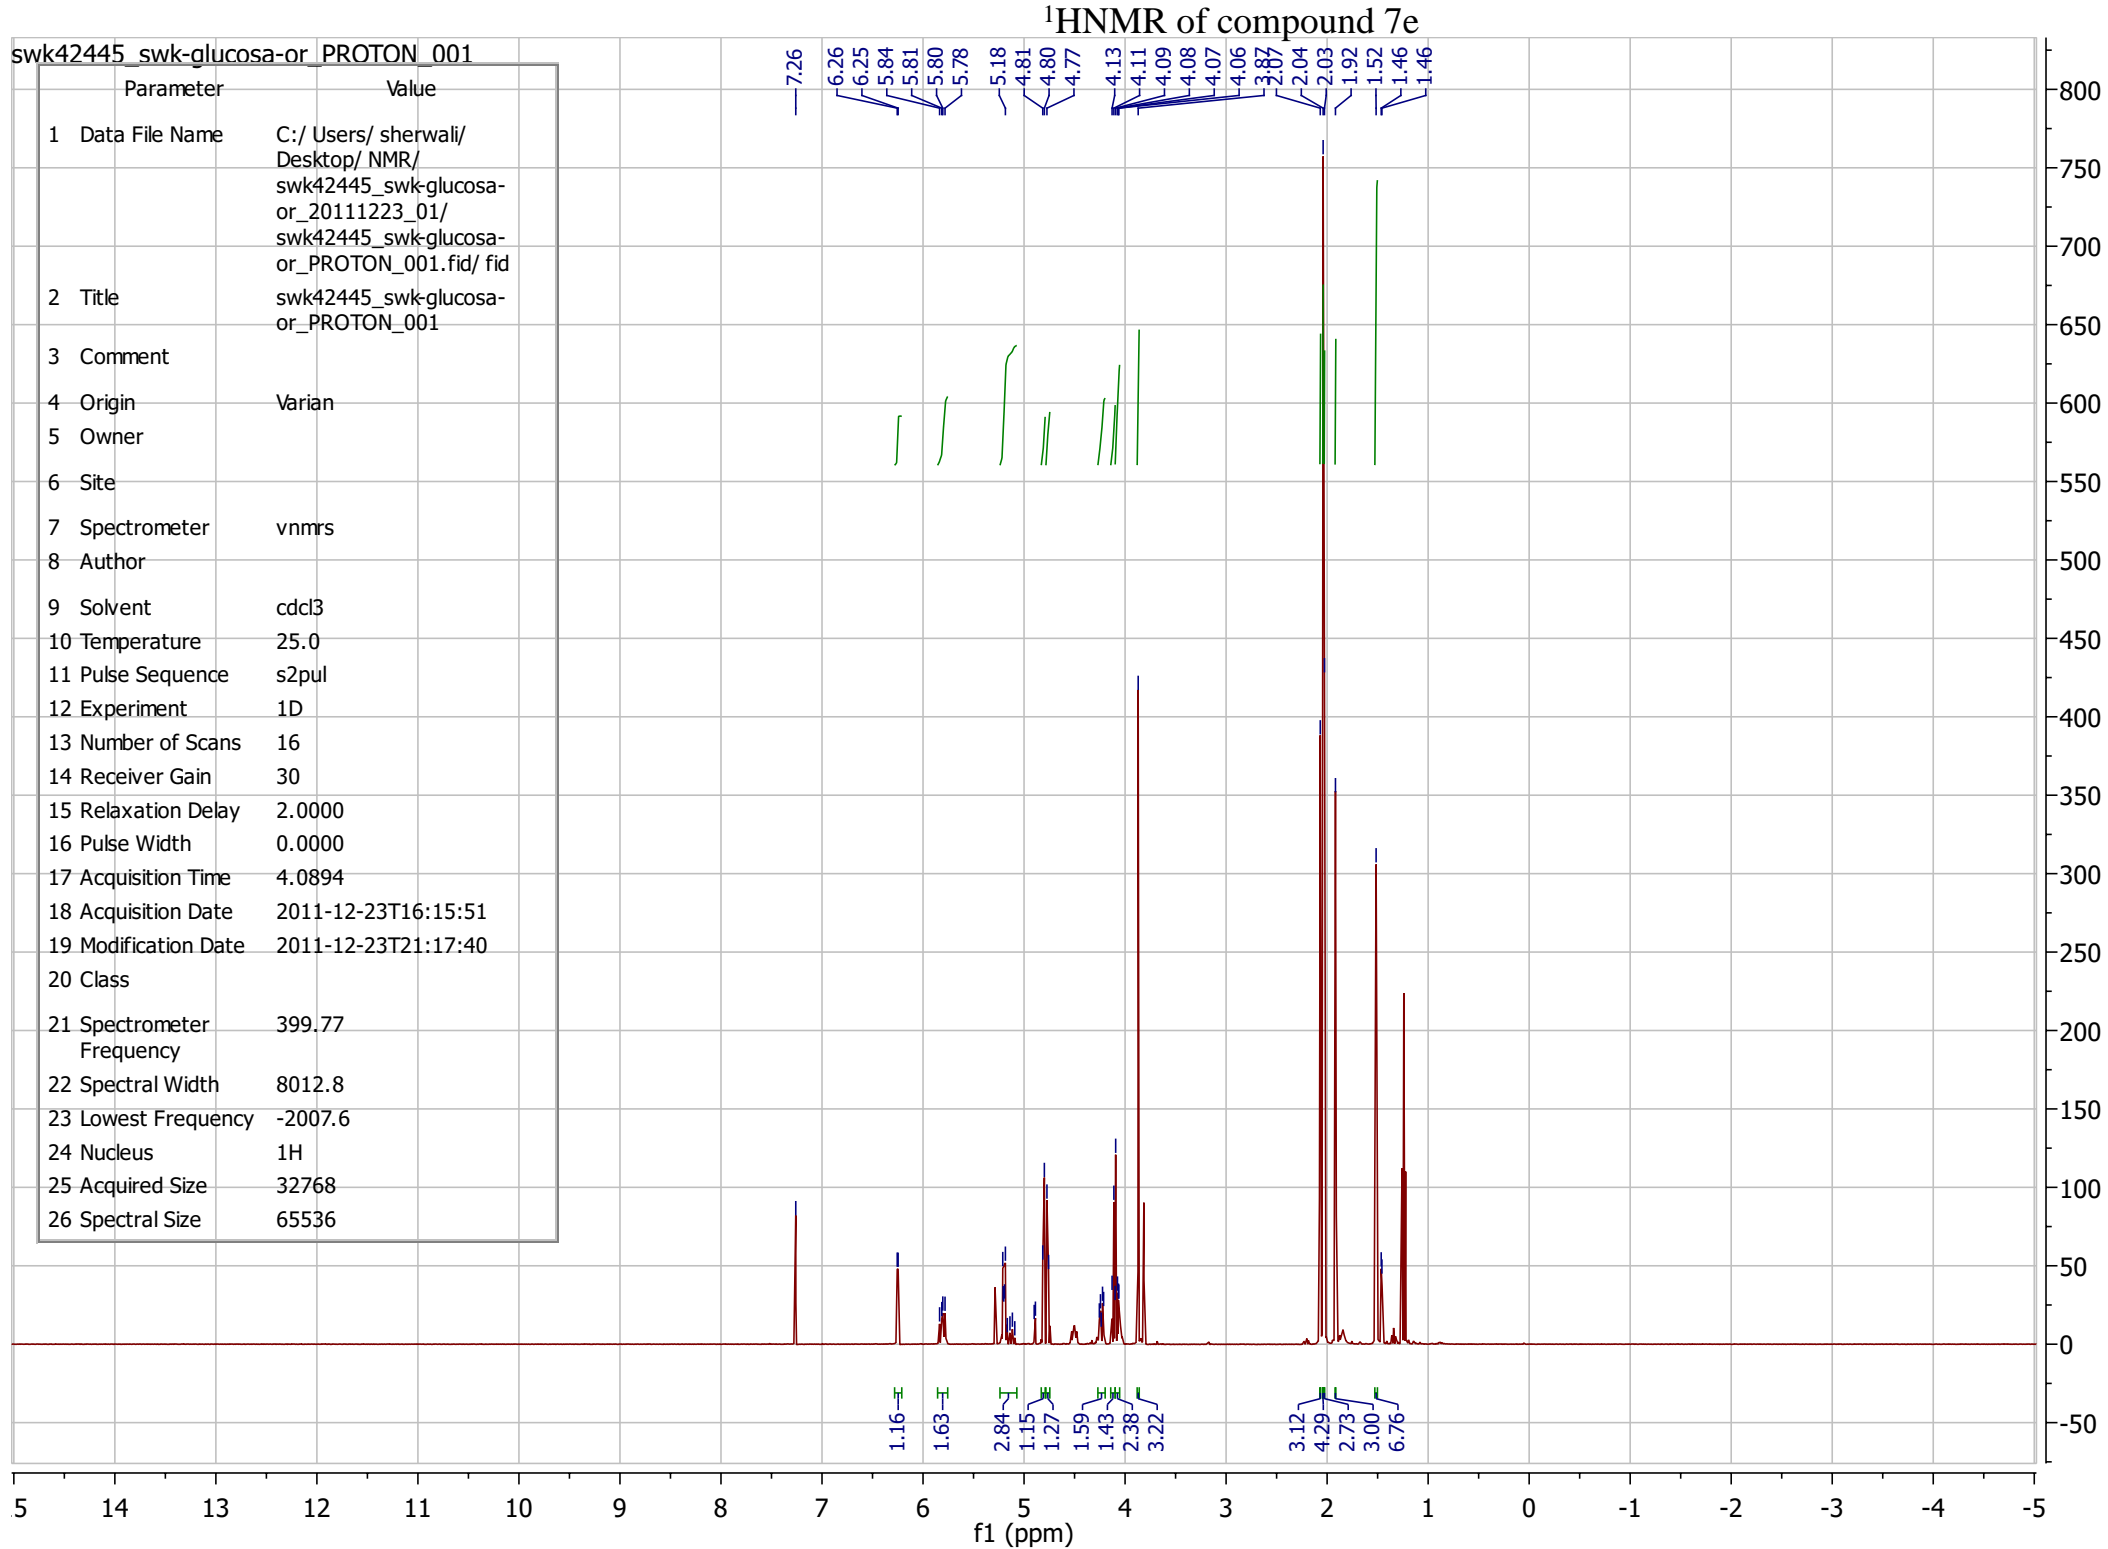

Supplement: f1 [file 9648710.f1.zip]

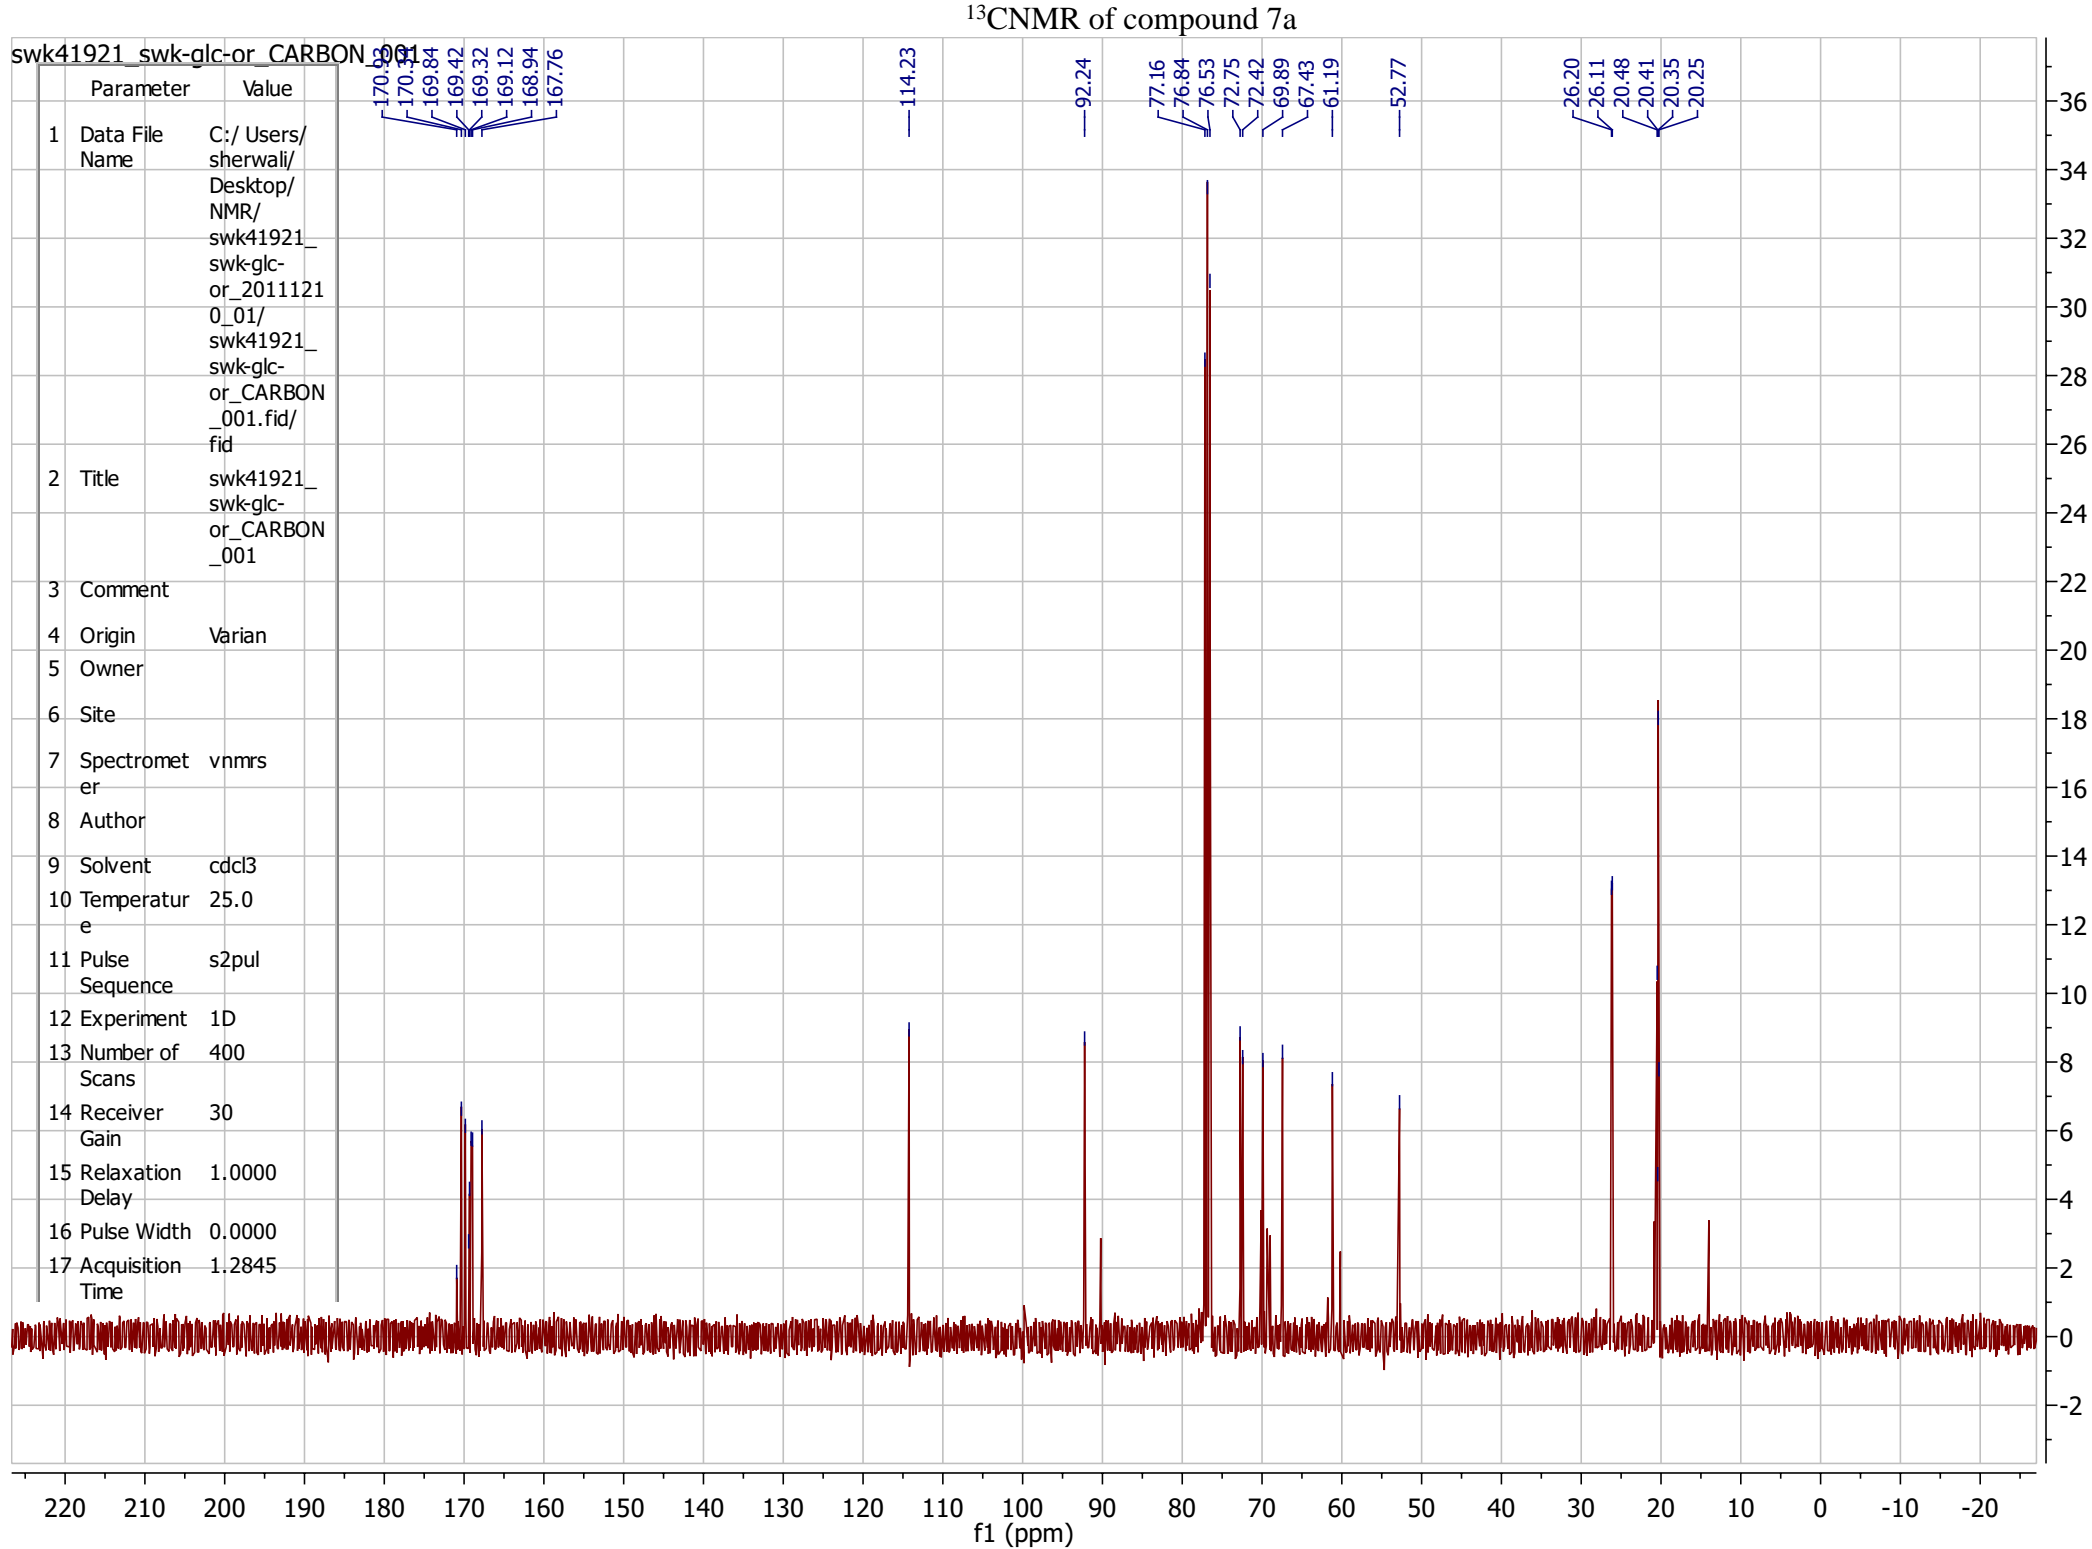

Supplement: f1 [file 9648710.f1.zip]

a.i.

swk-galac-OR +ESI

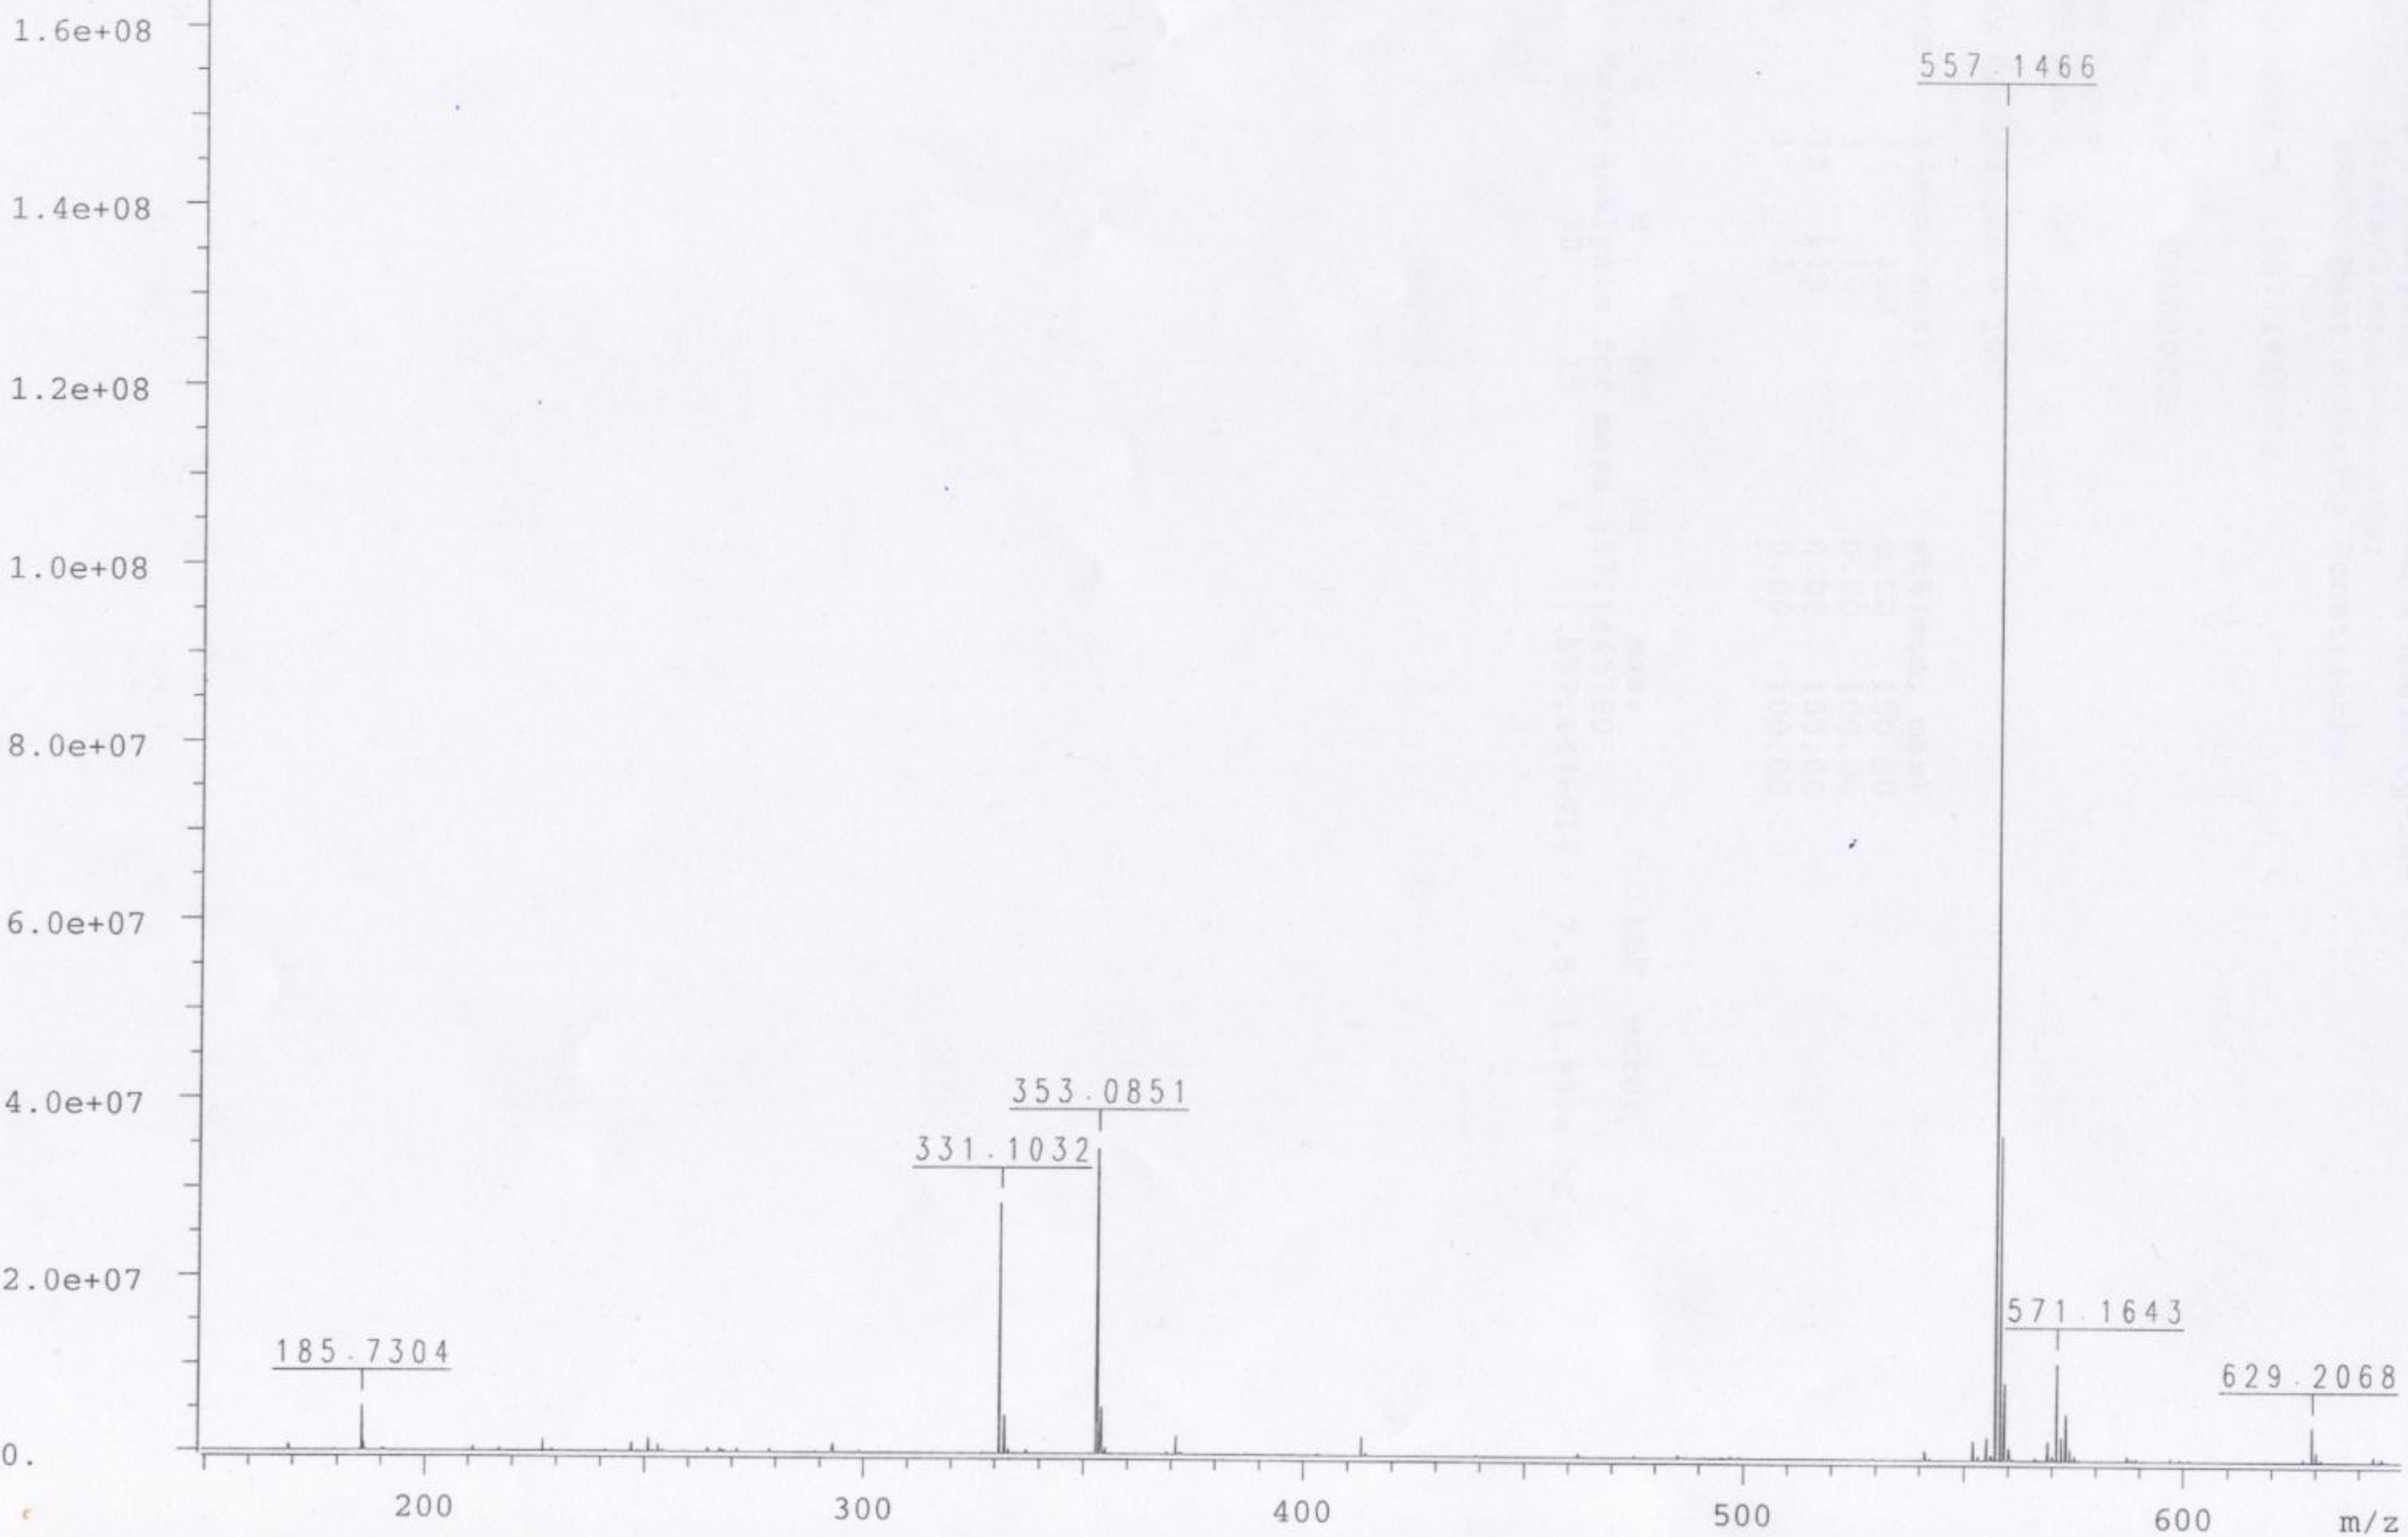

Supplement: f1 [file 9648710.f1.zip]

SWK-Glucosa-OR +ESI

a.i.

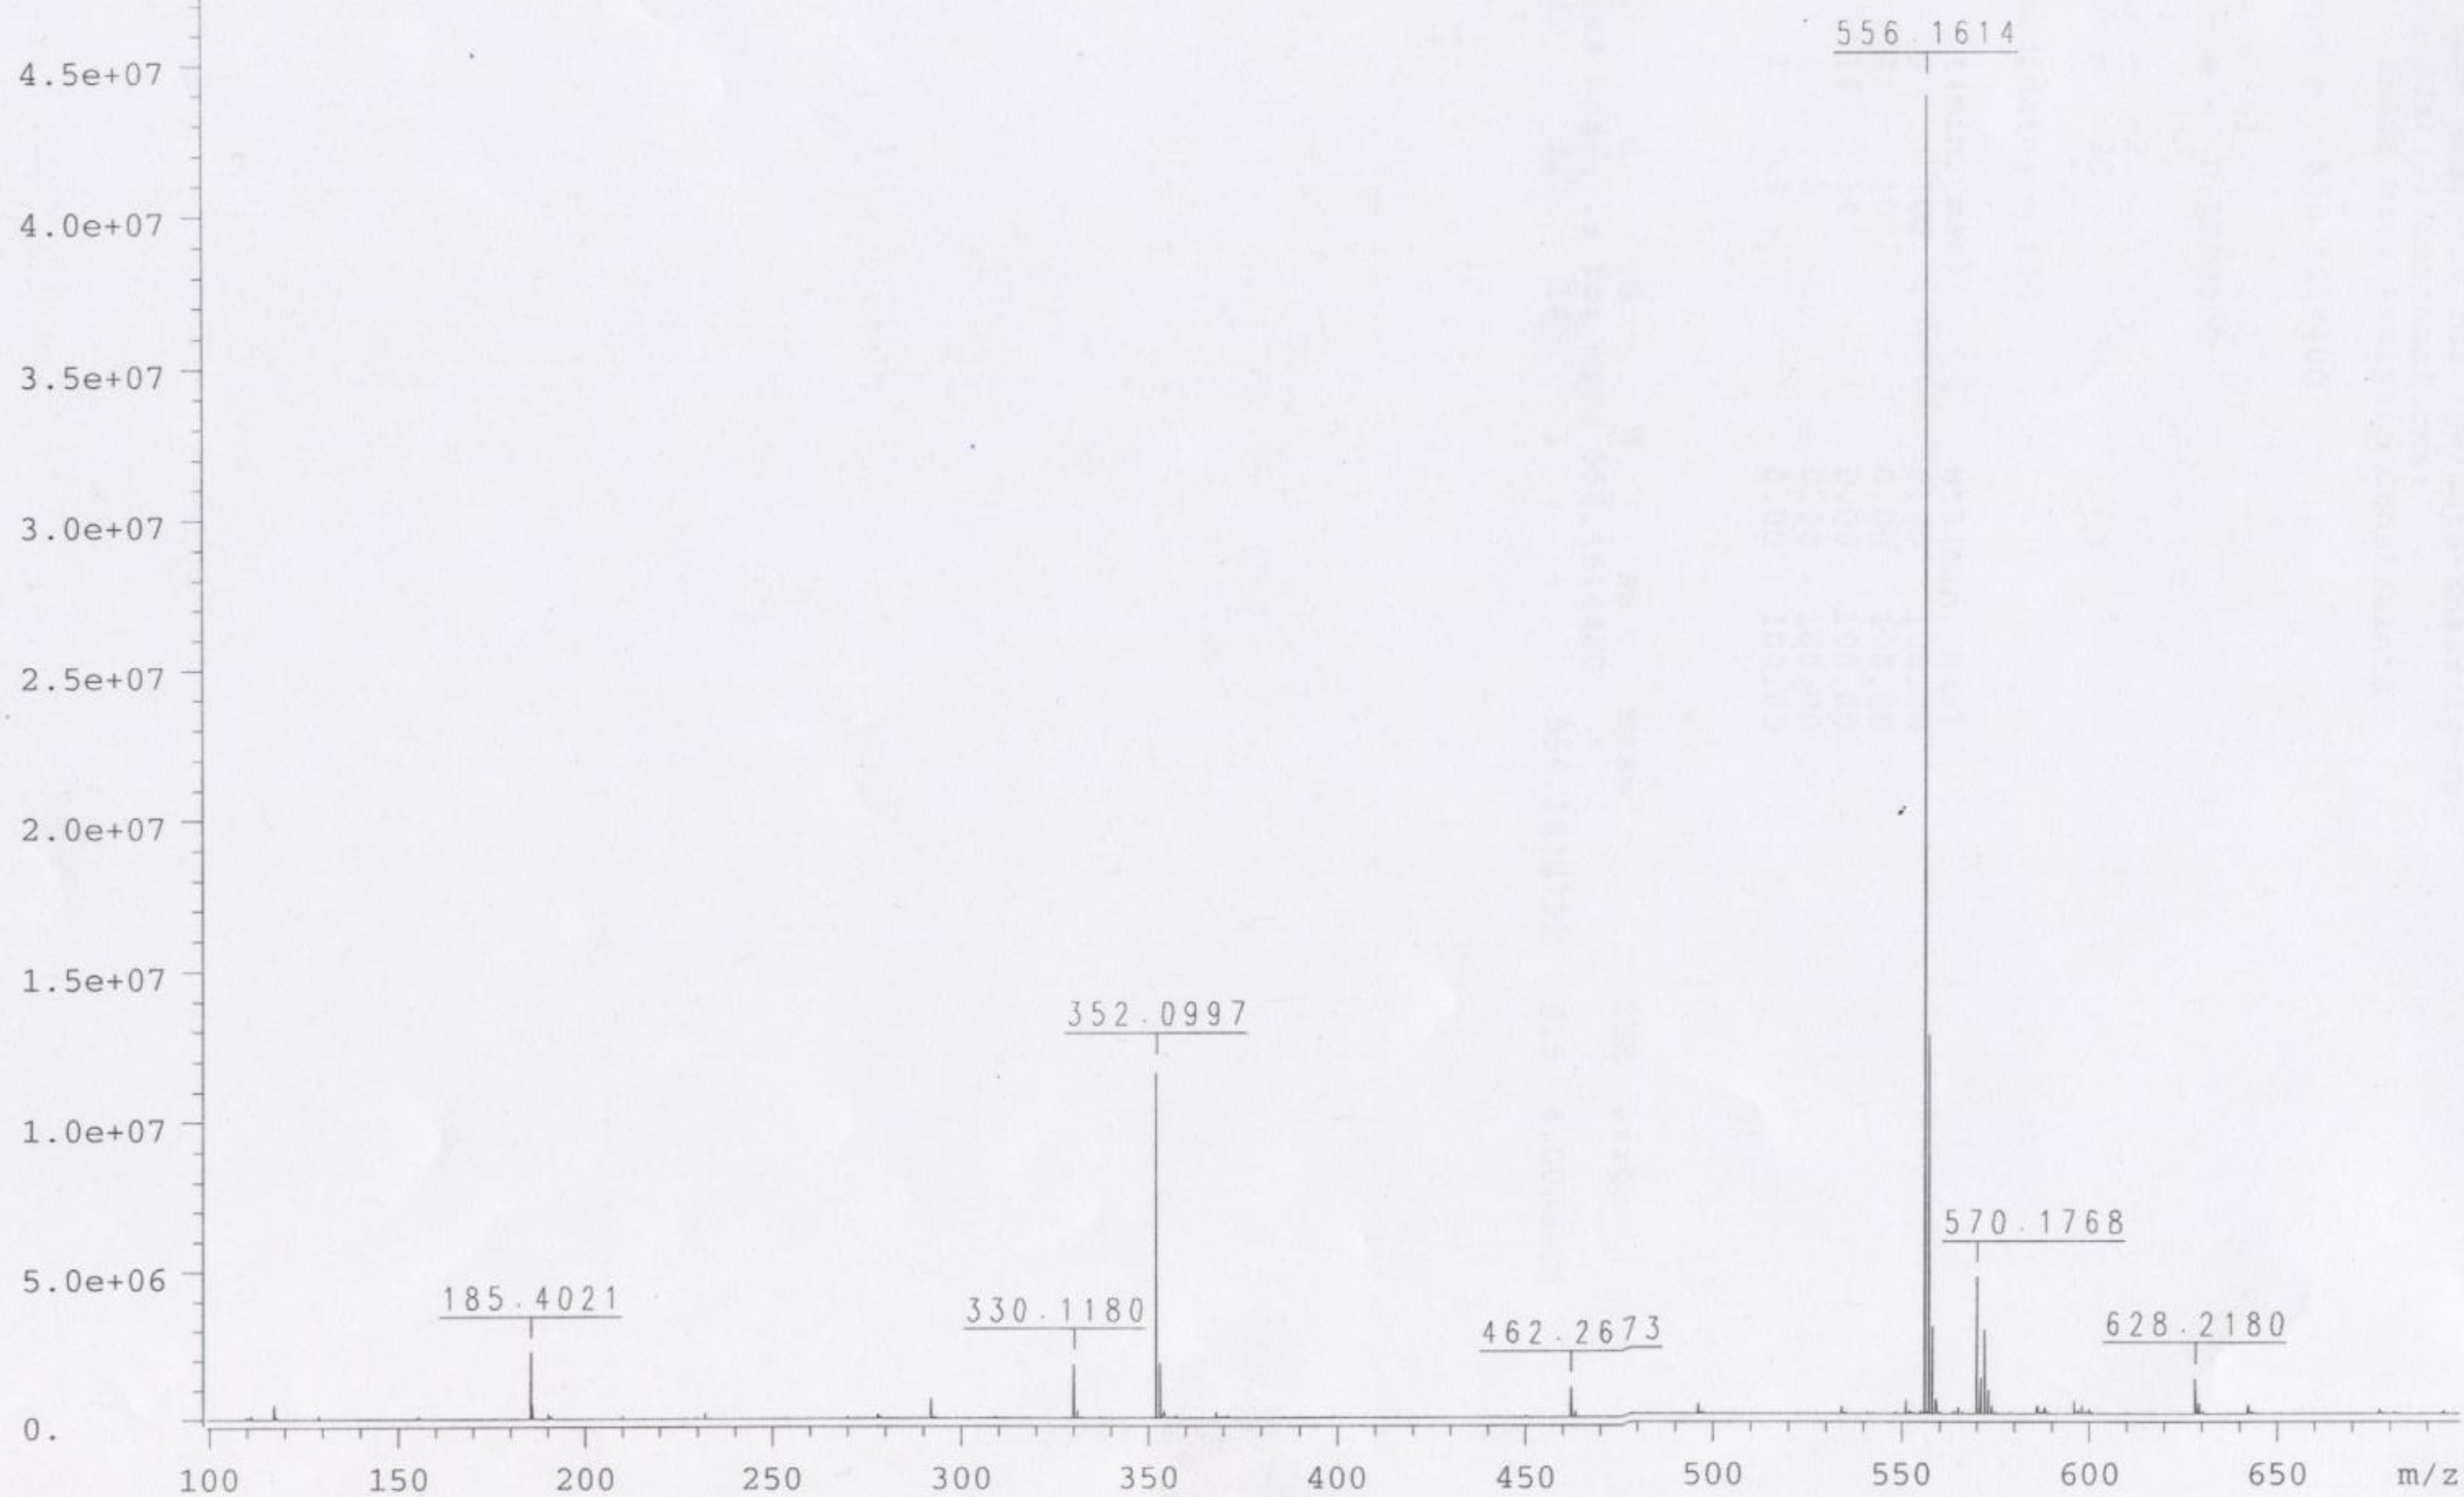

Supplement: f1 [file 9648710.f1.zip]

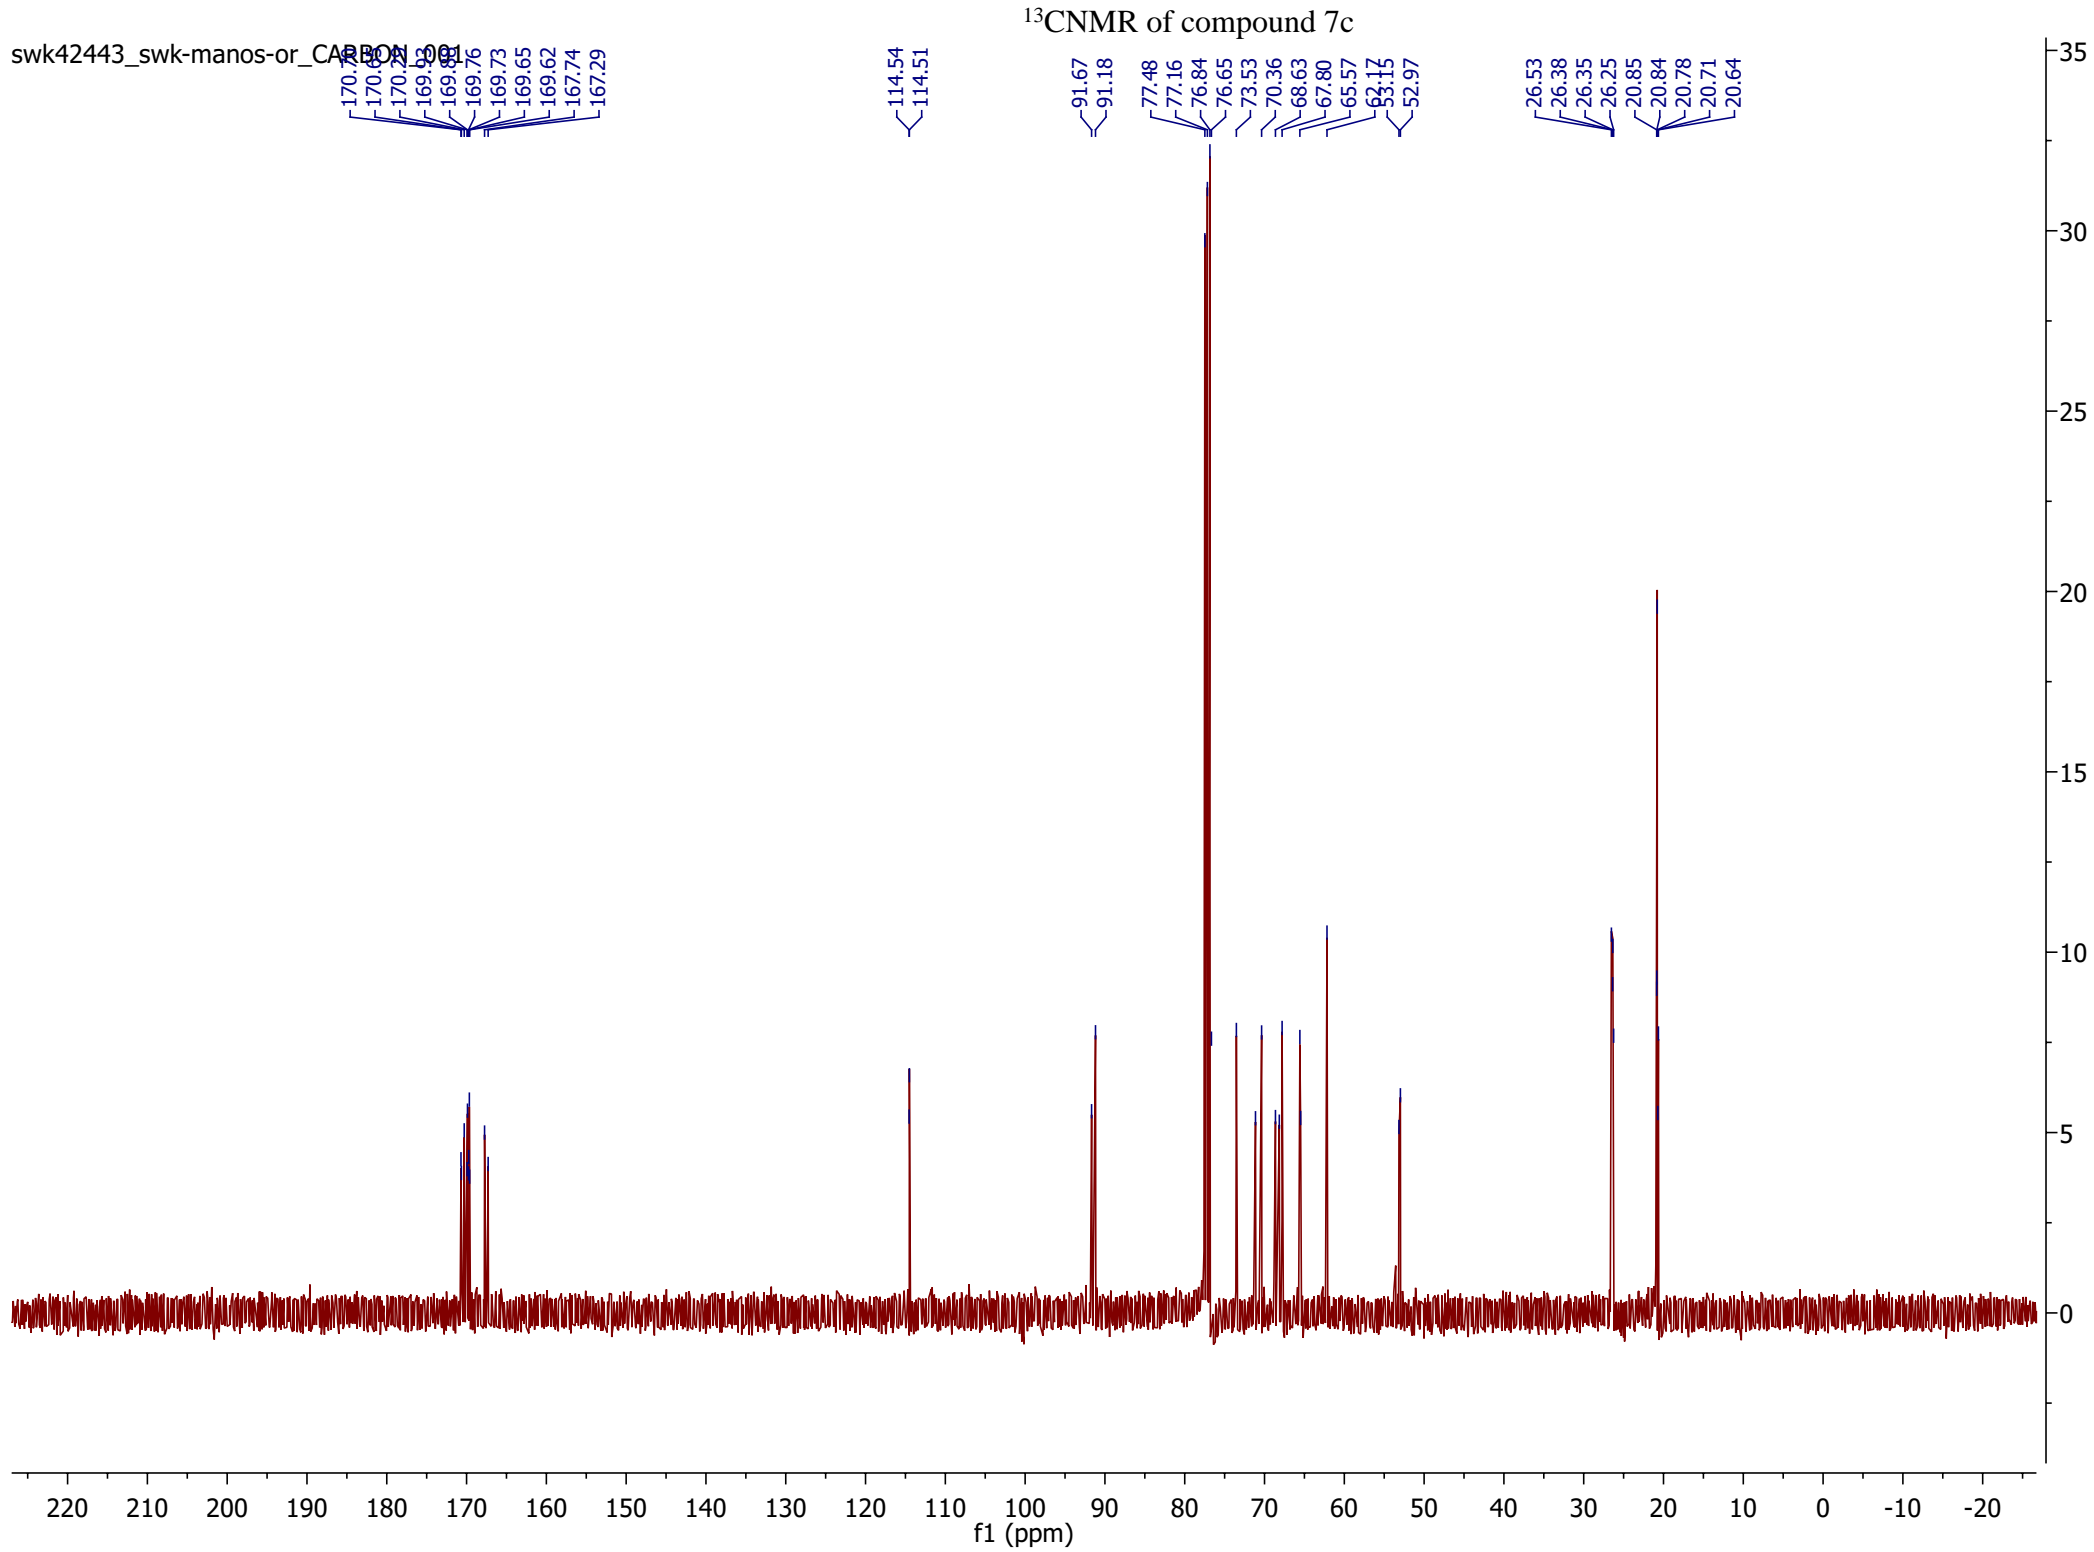

Supplement: f1 [file 9648710.f1.zip]

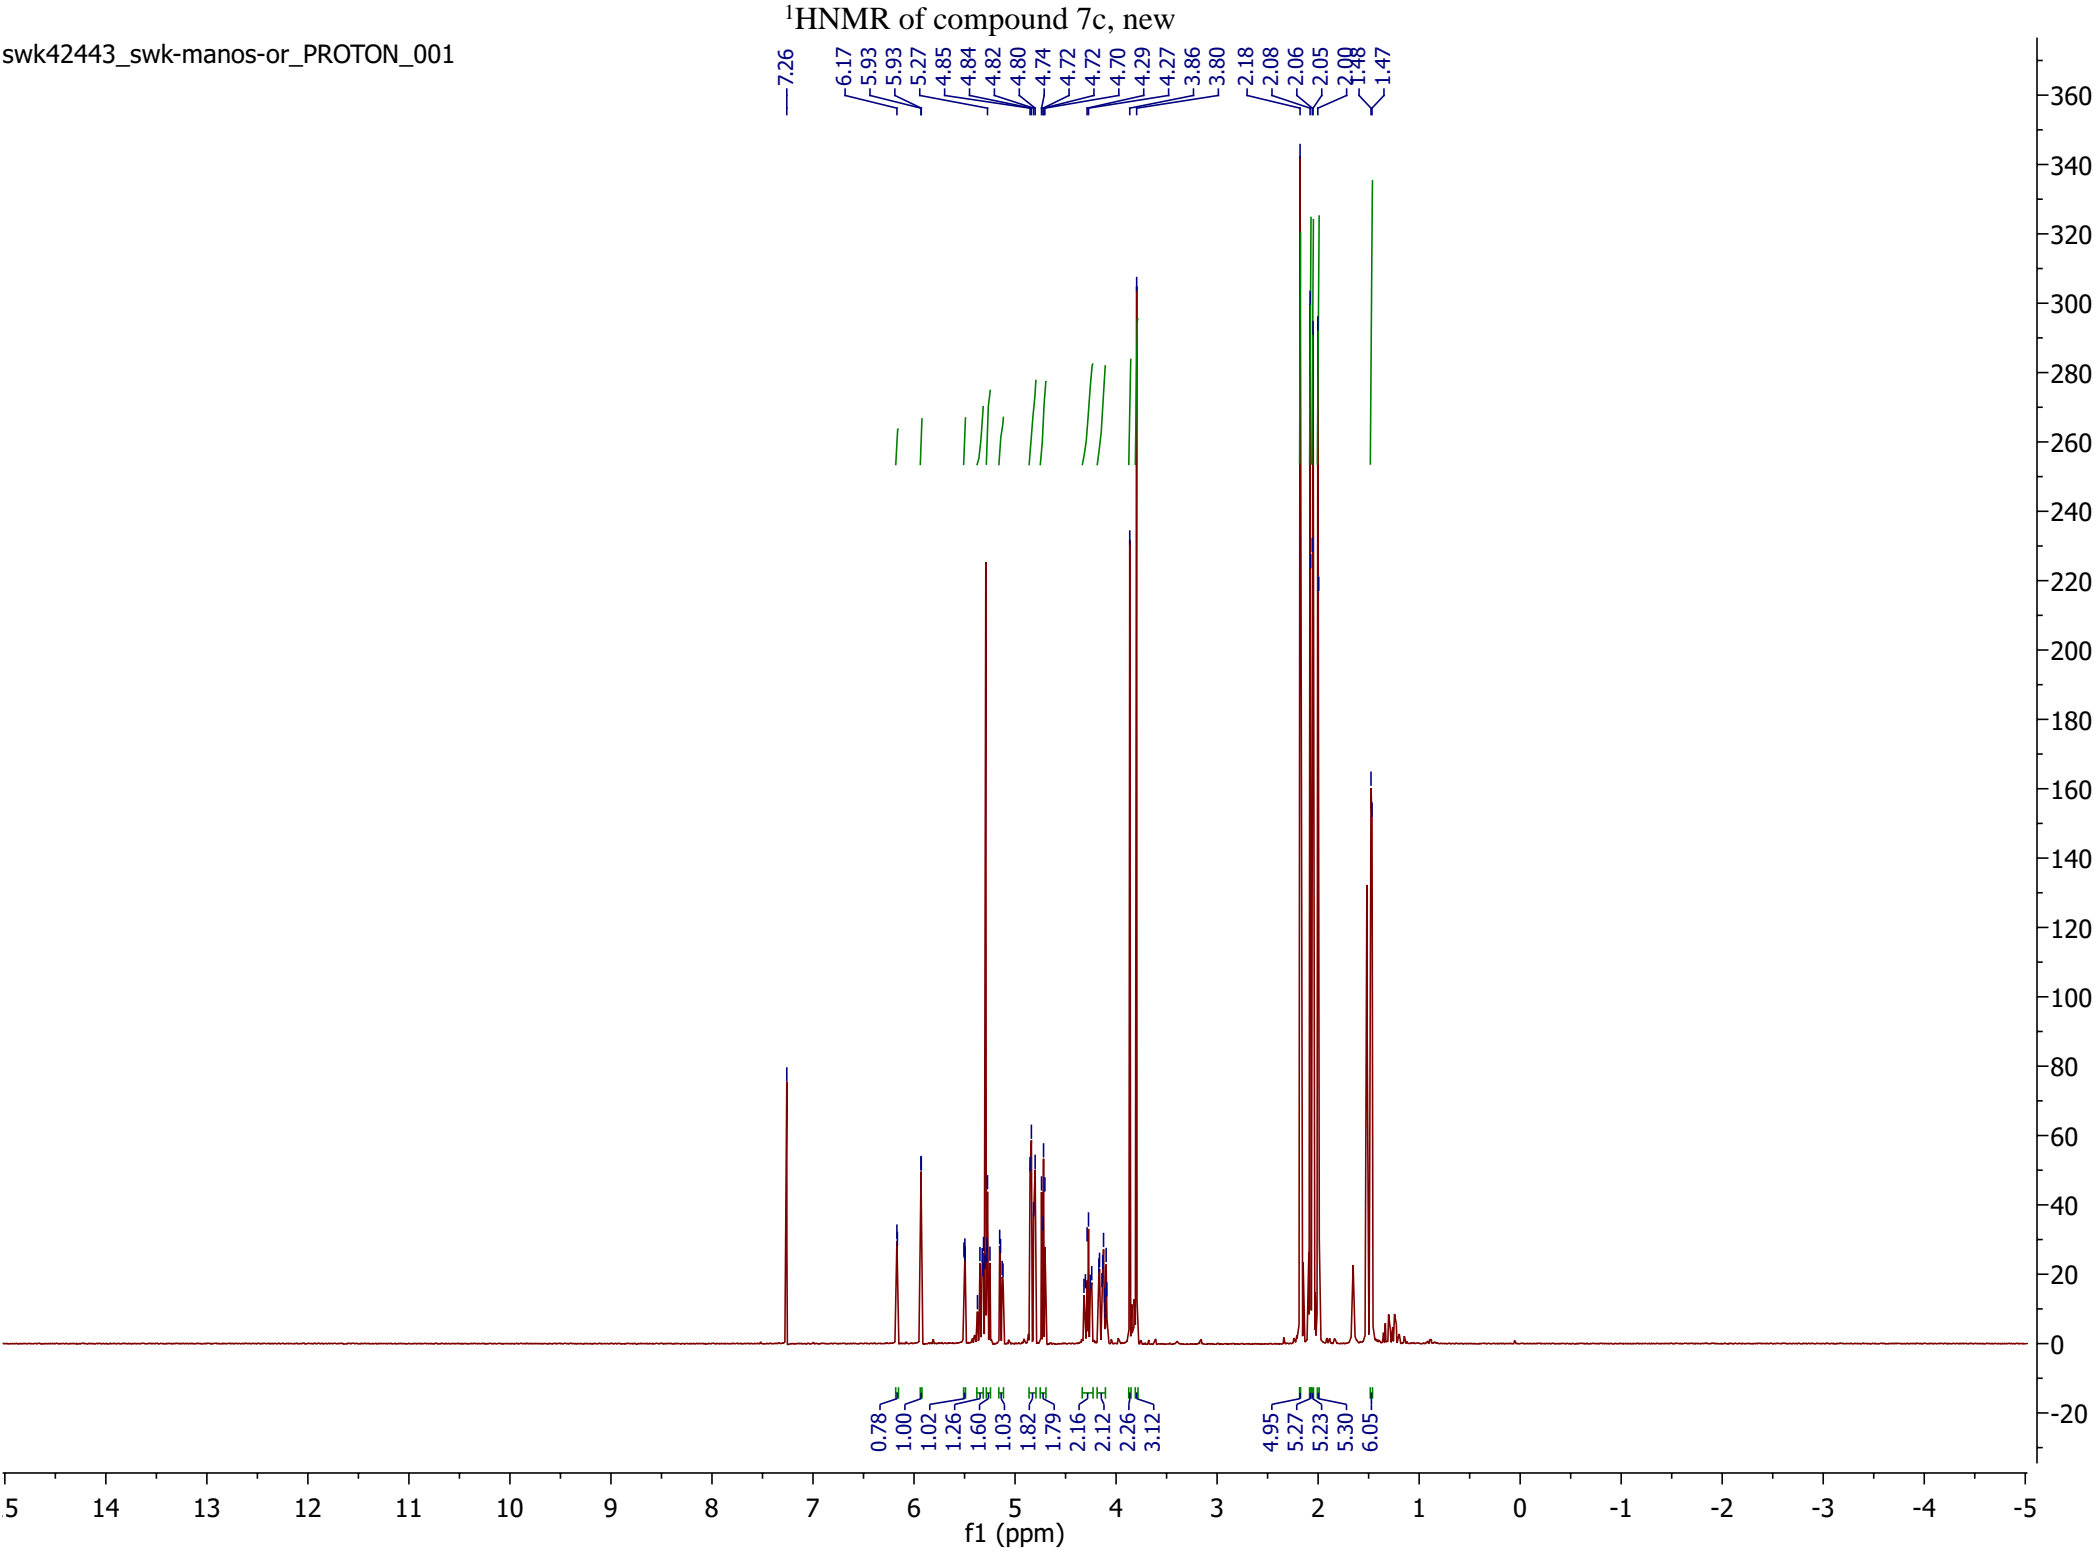

Supplement: f1 [file 9648710.f1.zip]

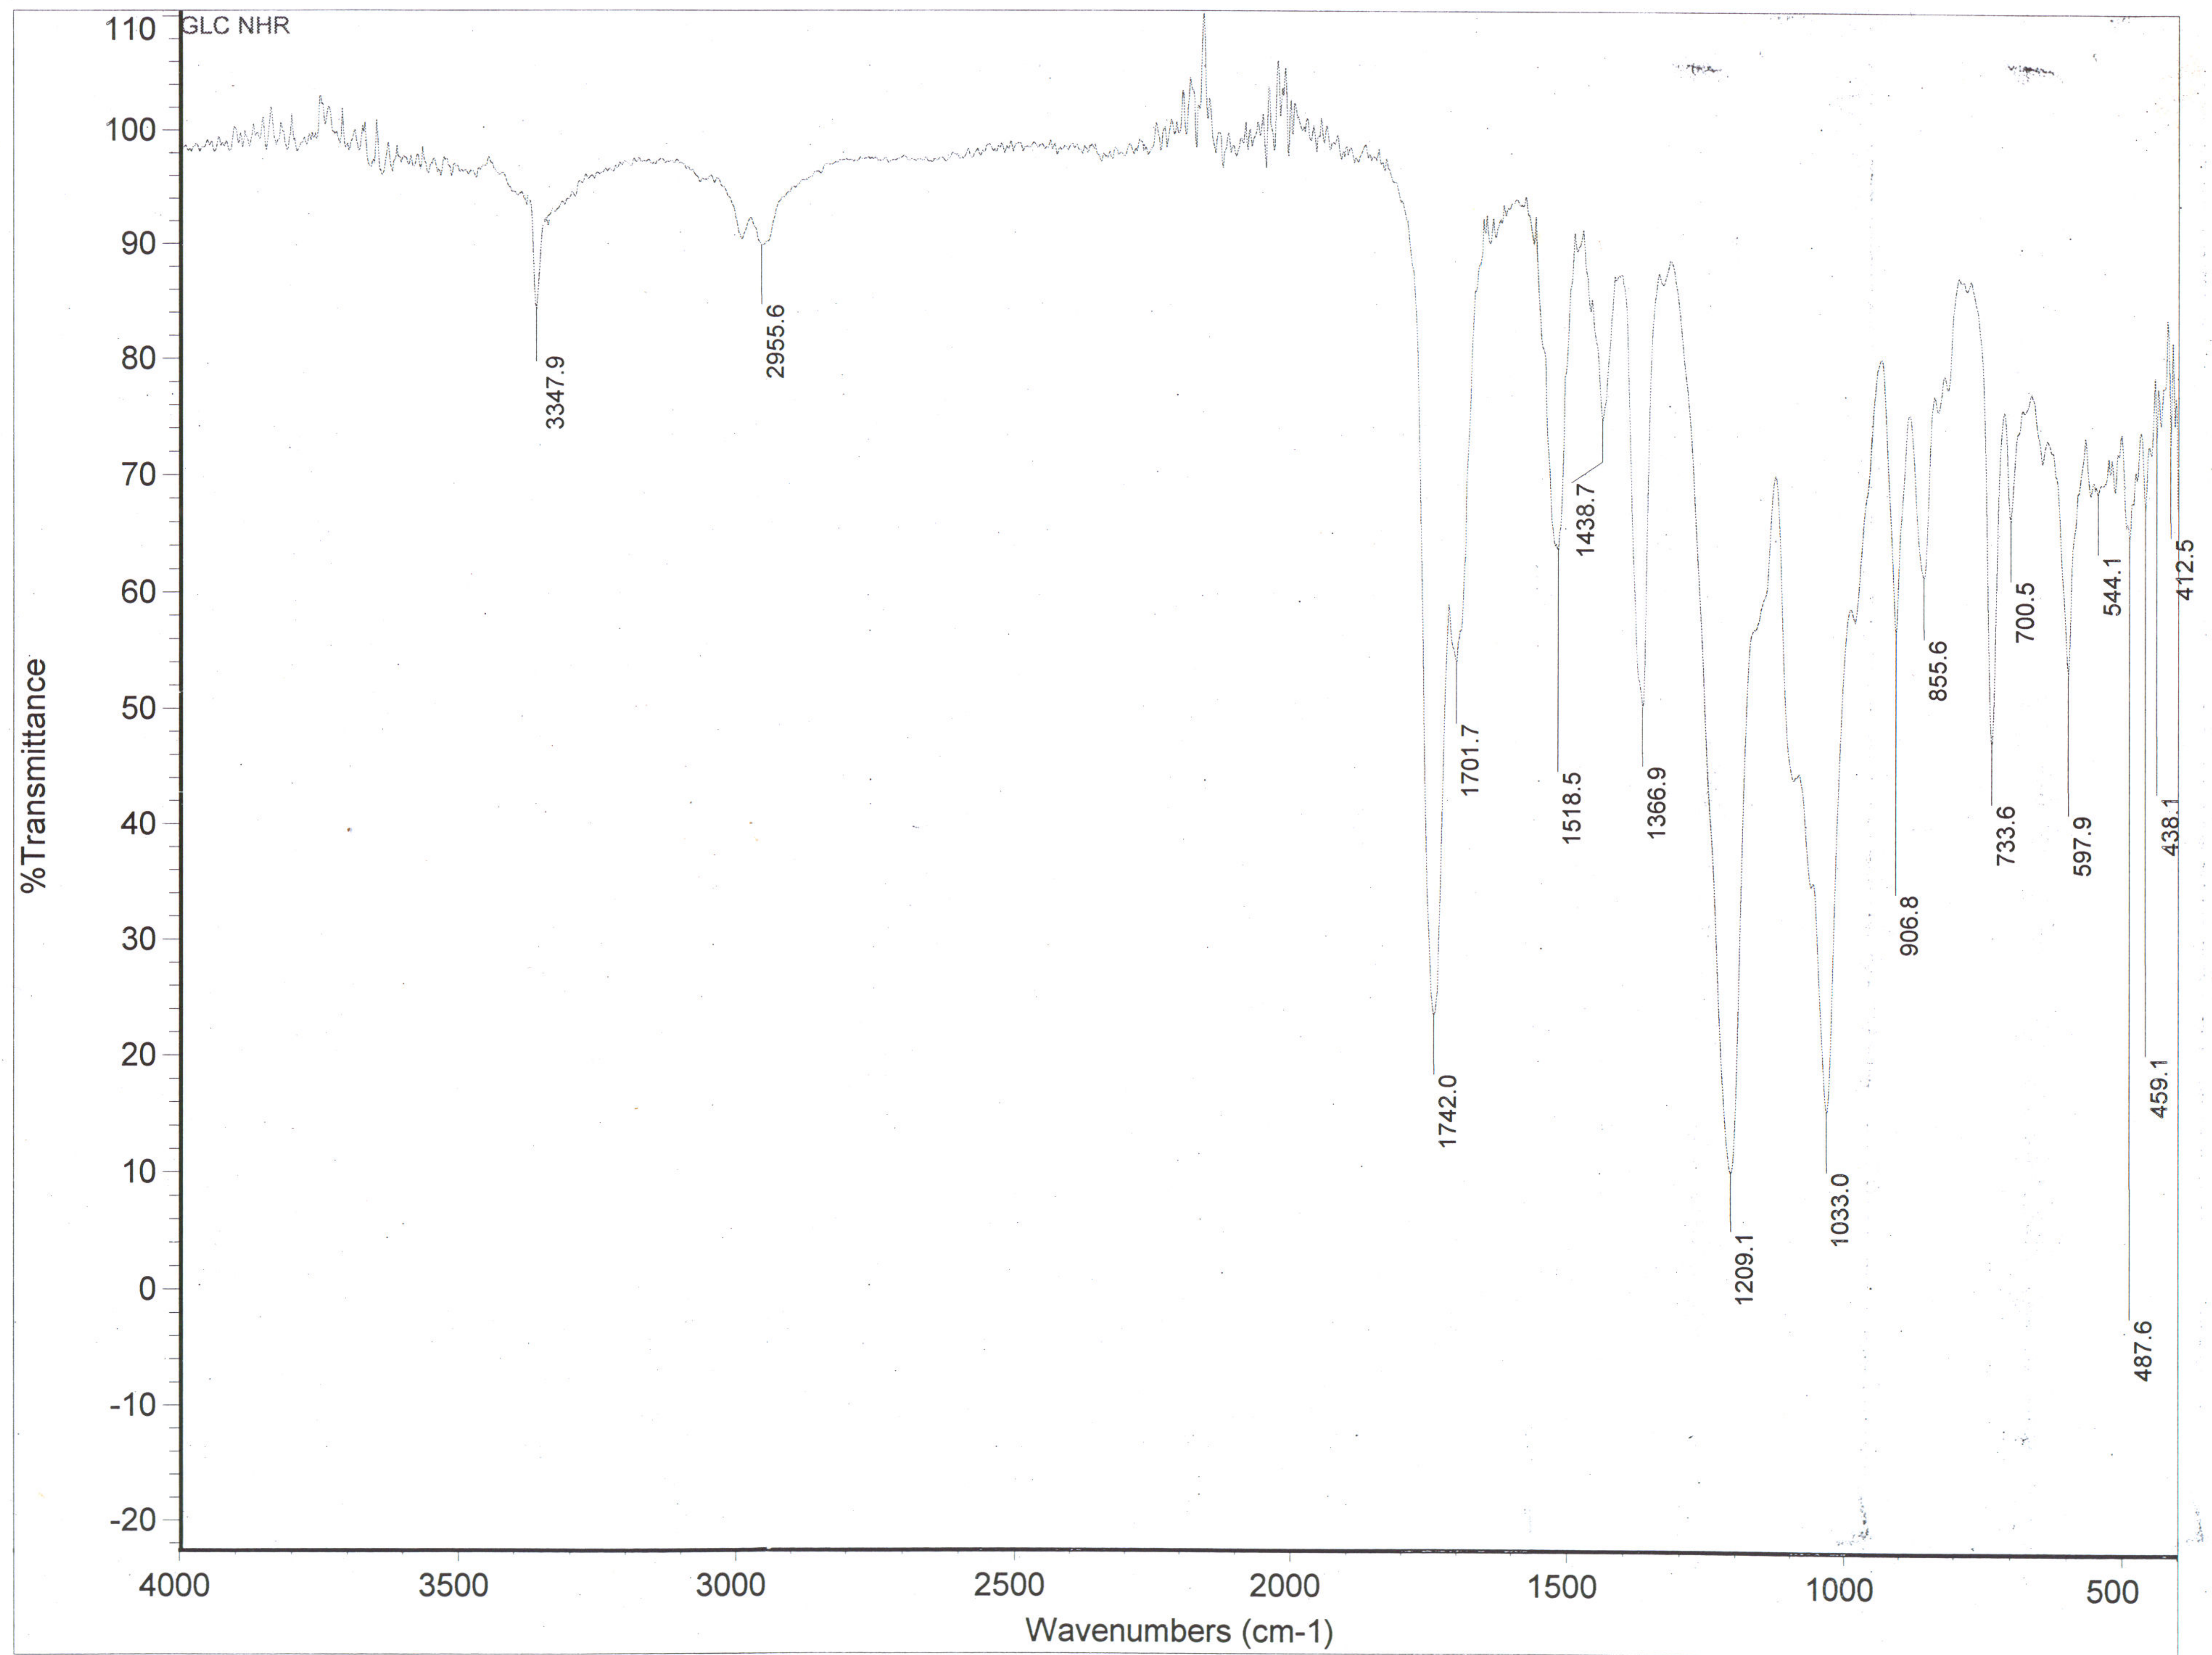

Supplement: f1 [file 9648710.f1.zip]

swk41921\_swk-glc-or\_PROTON\_001

<sup>1</sup>HNMR of compound 7a

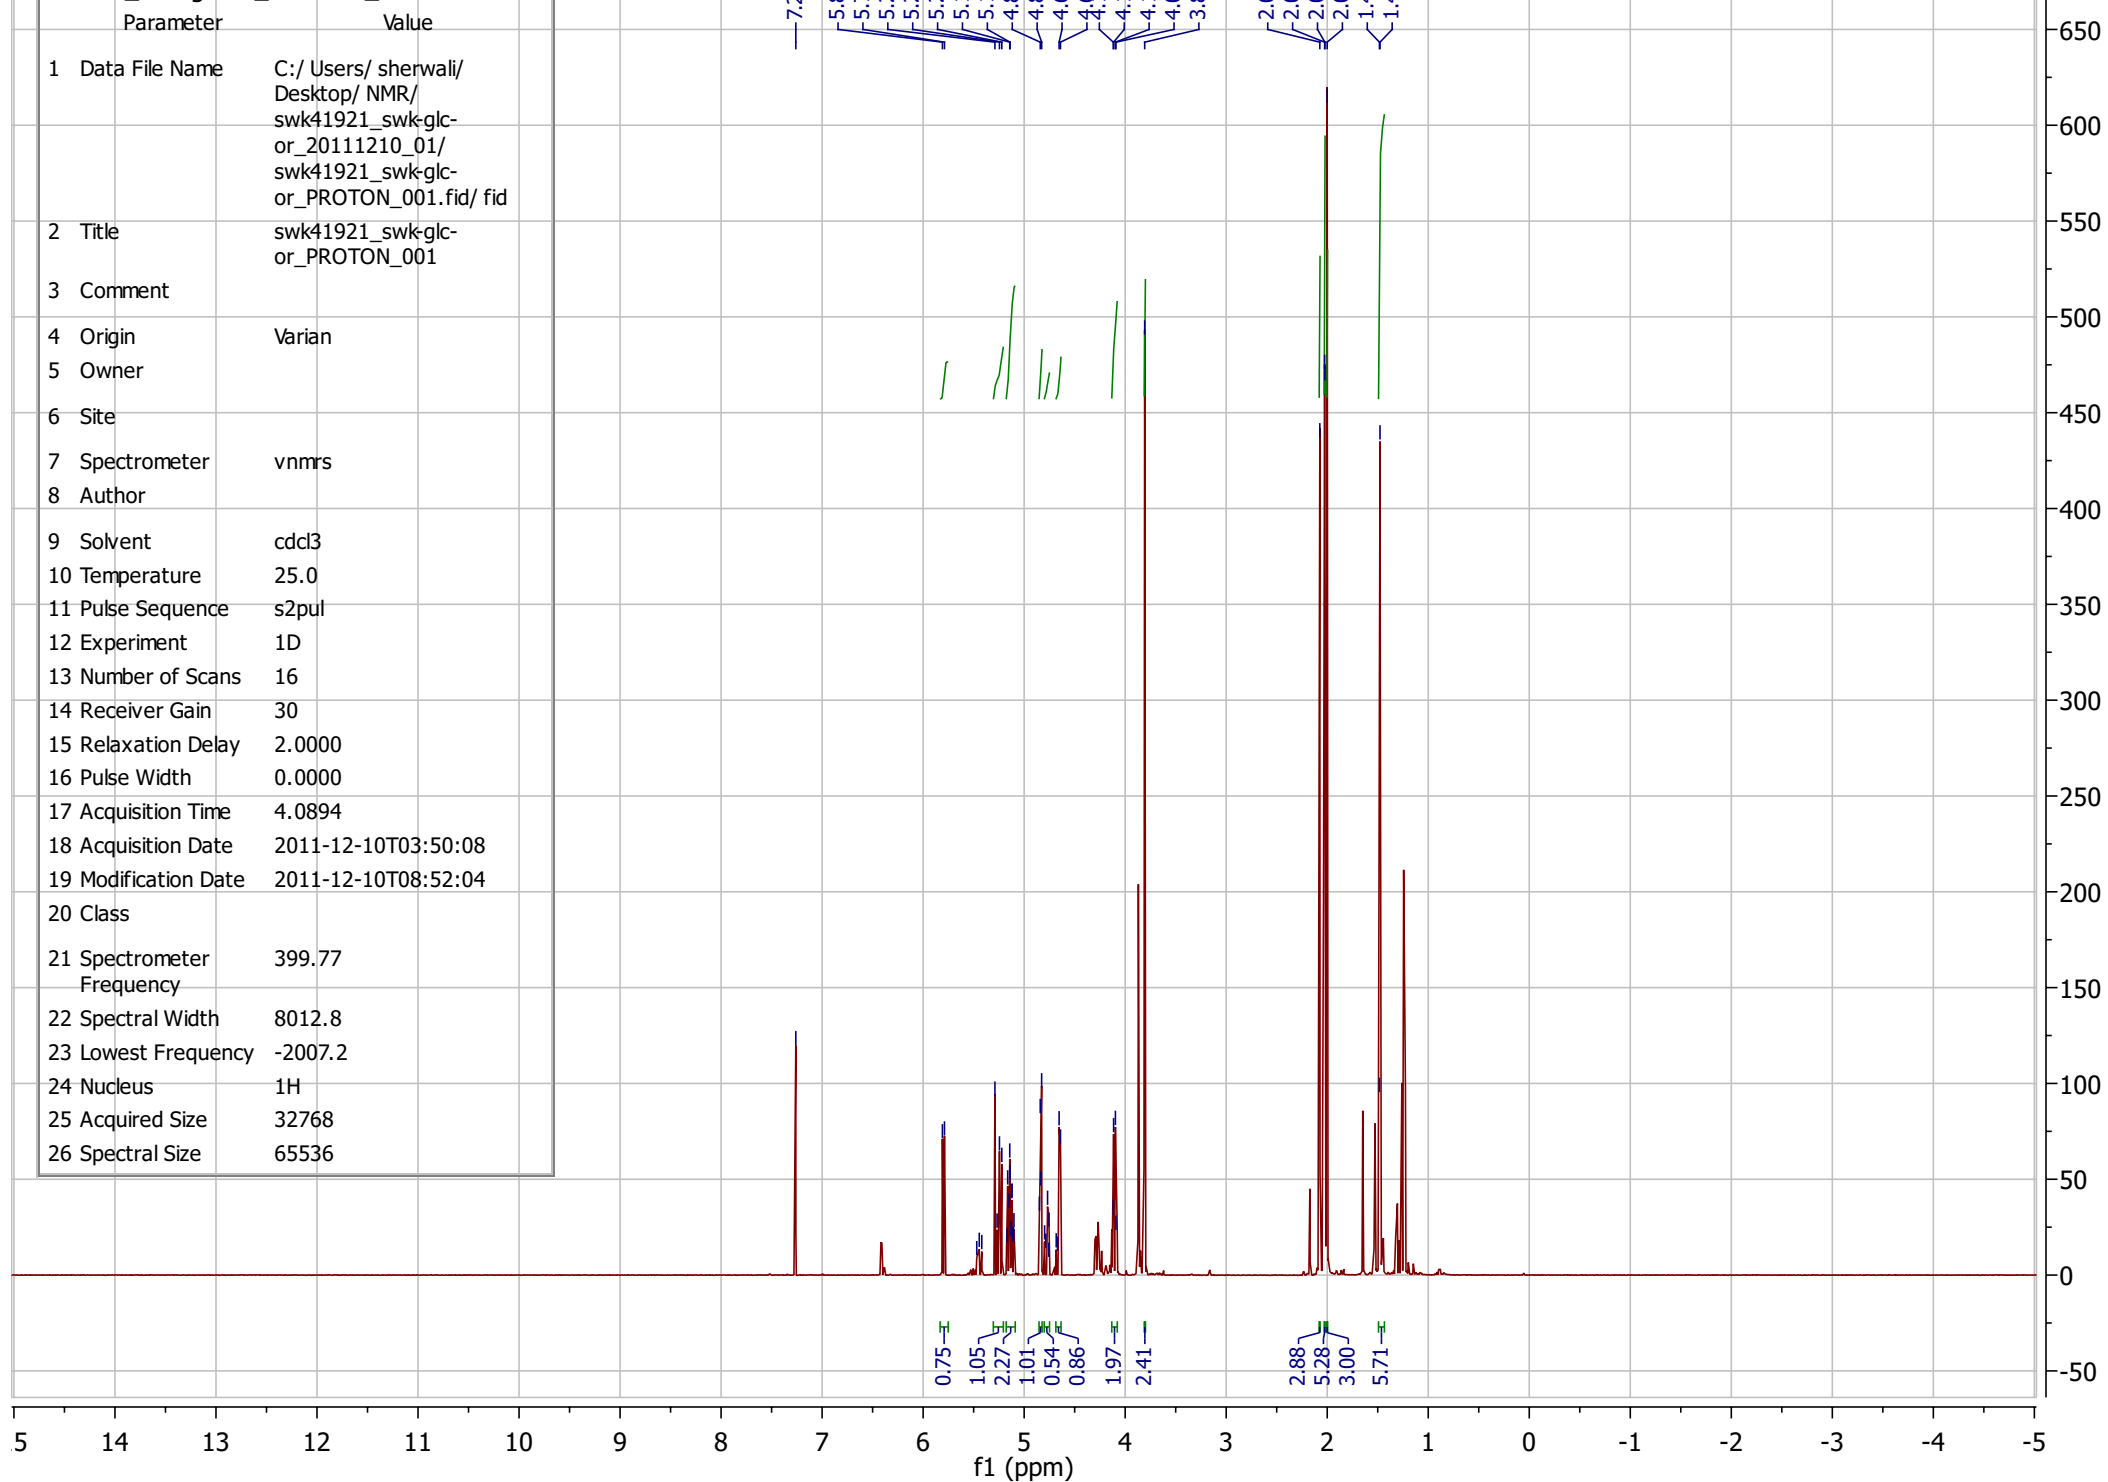

Supplement: f1 [file 9648710.f1.zip]

a.i.

SWK-Gal-NHR +ESI

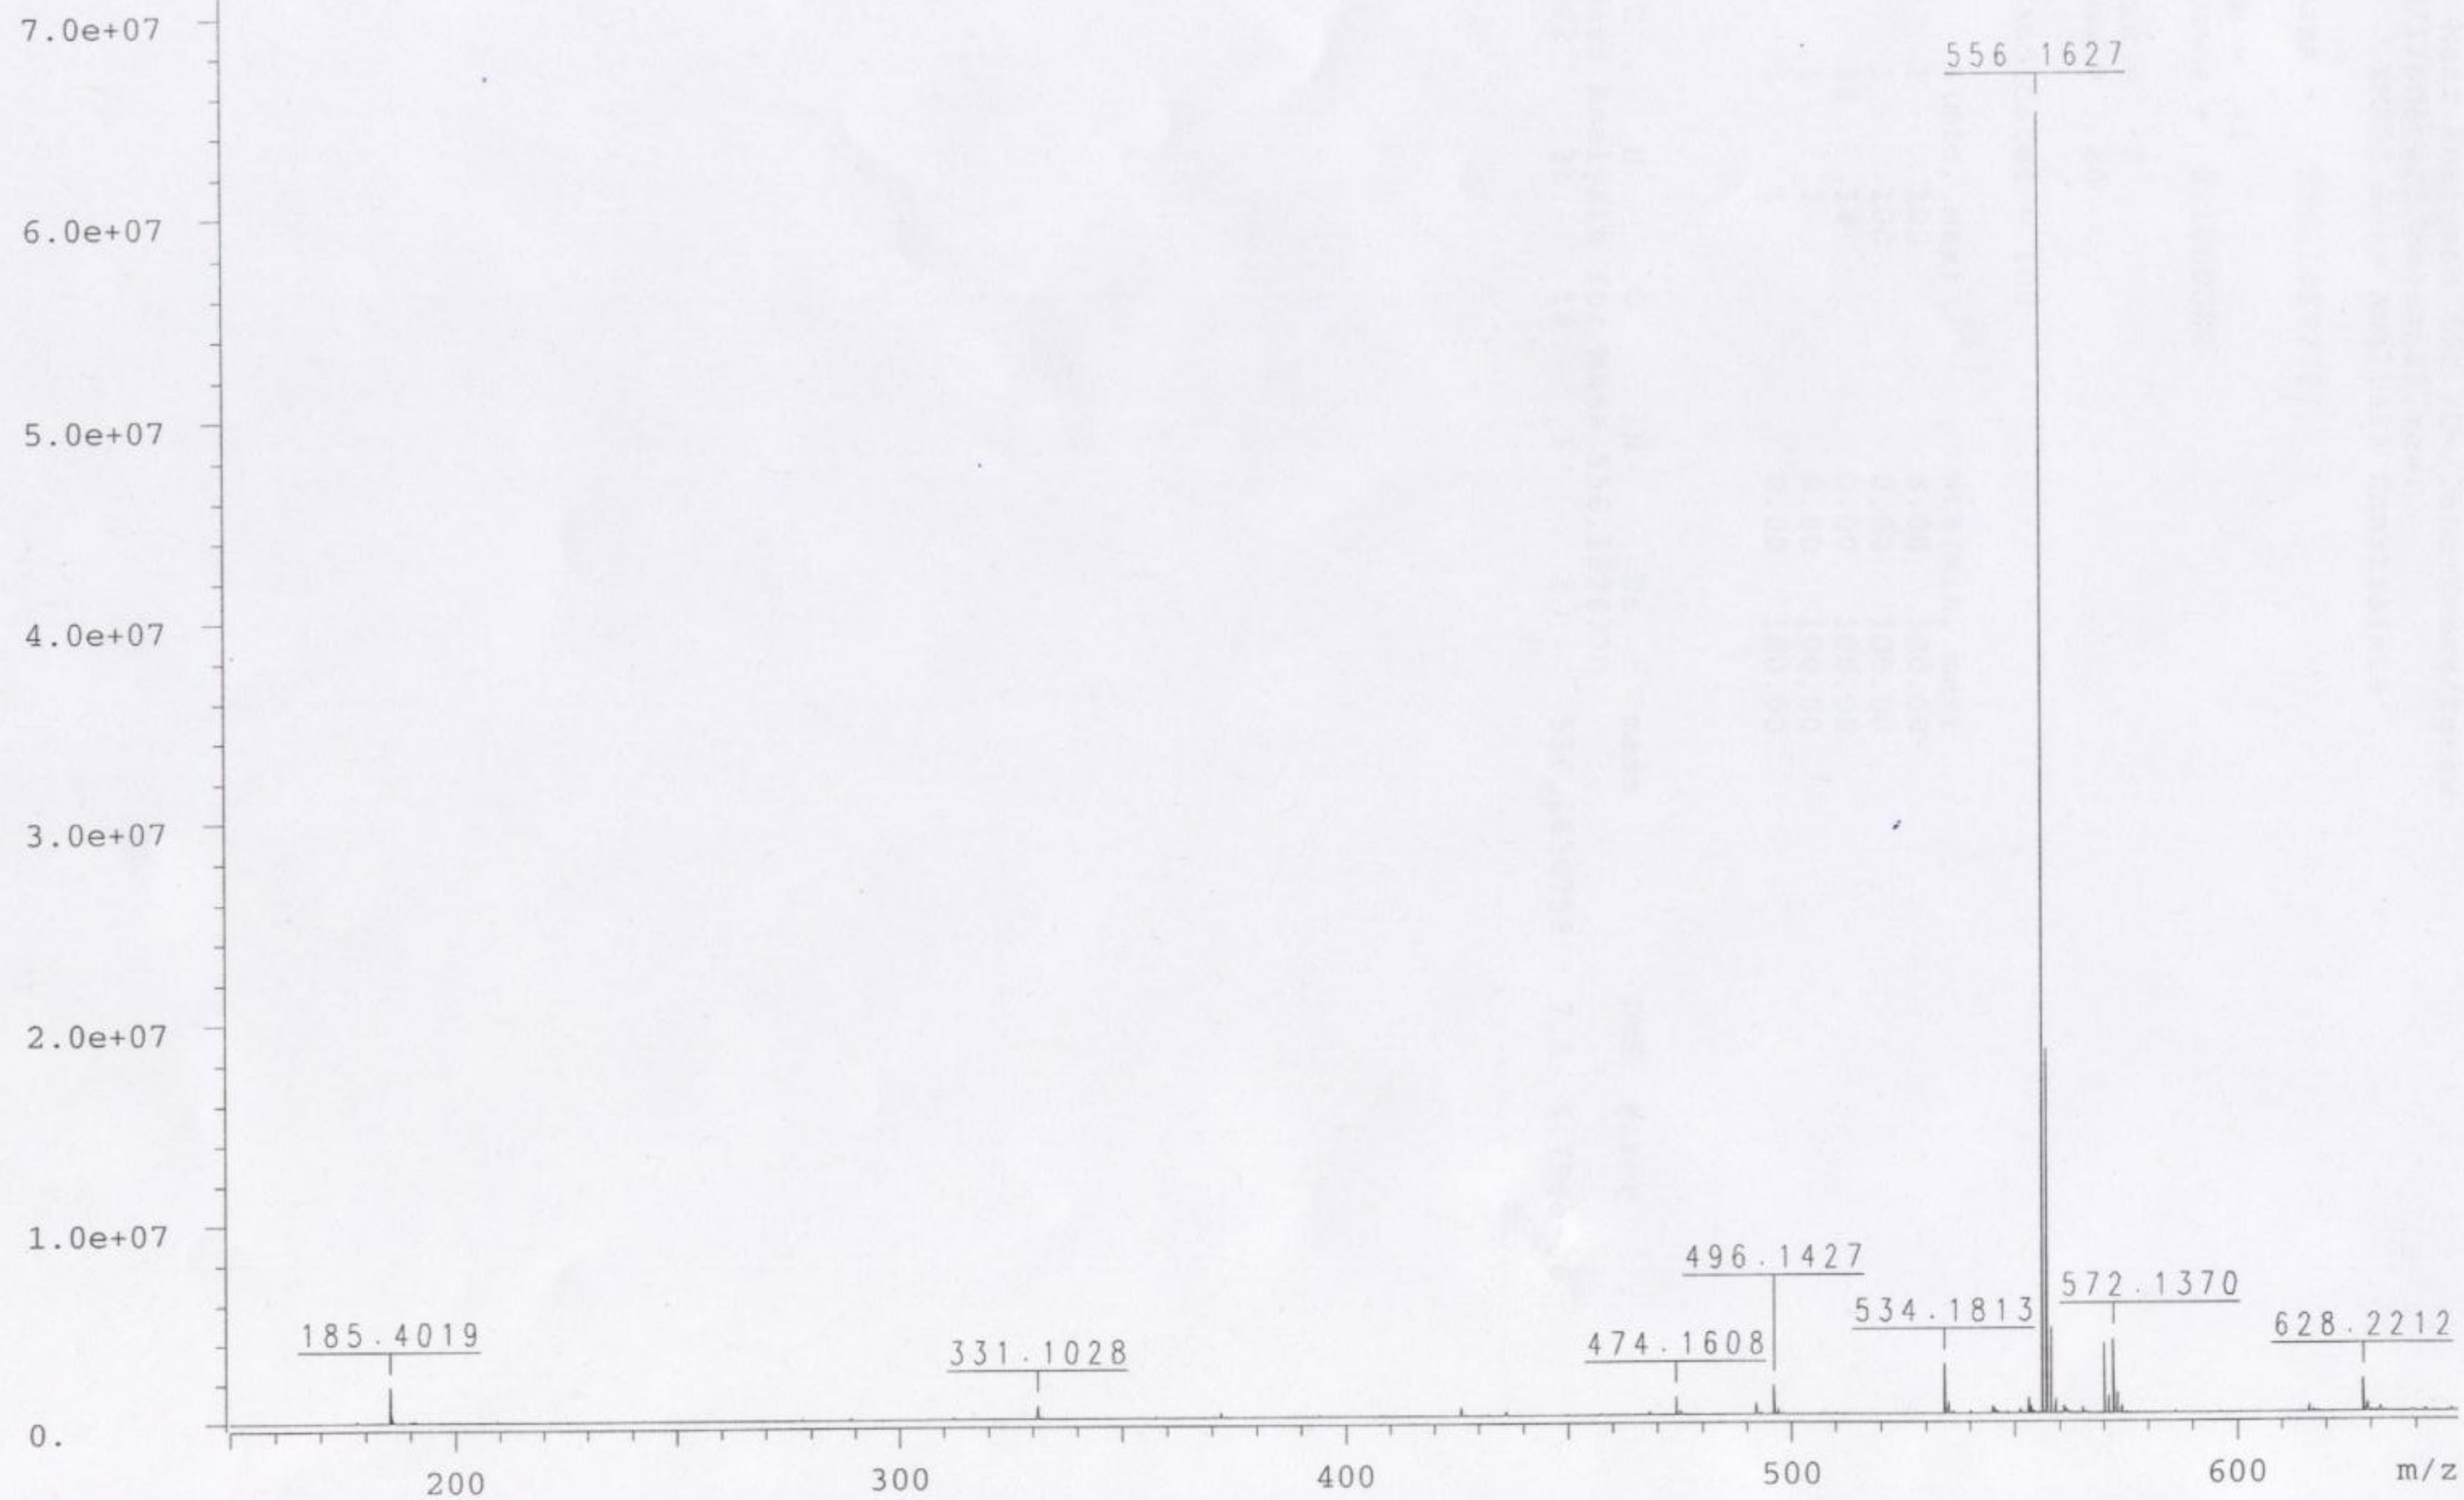

Supplement: f1 [file 9648710.f1.zip]

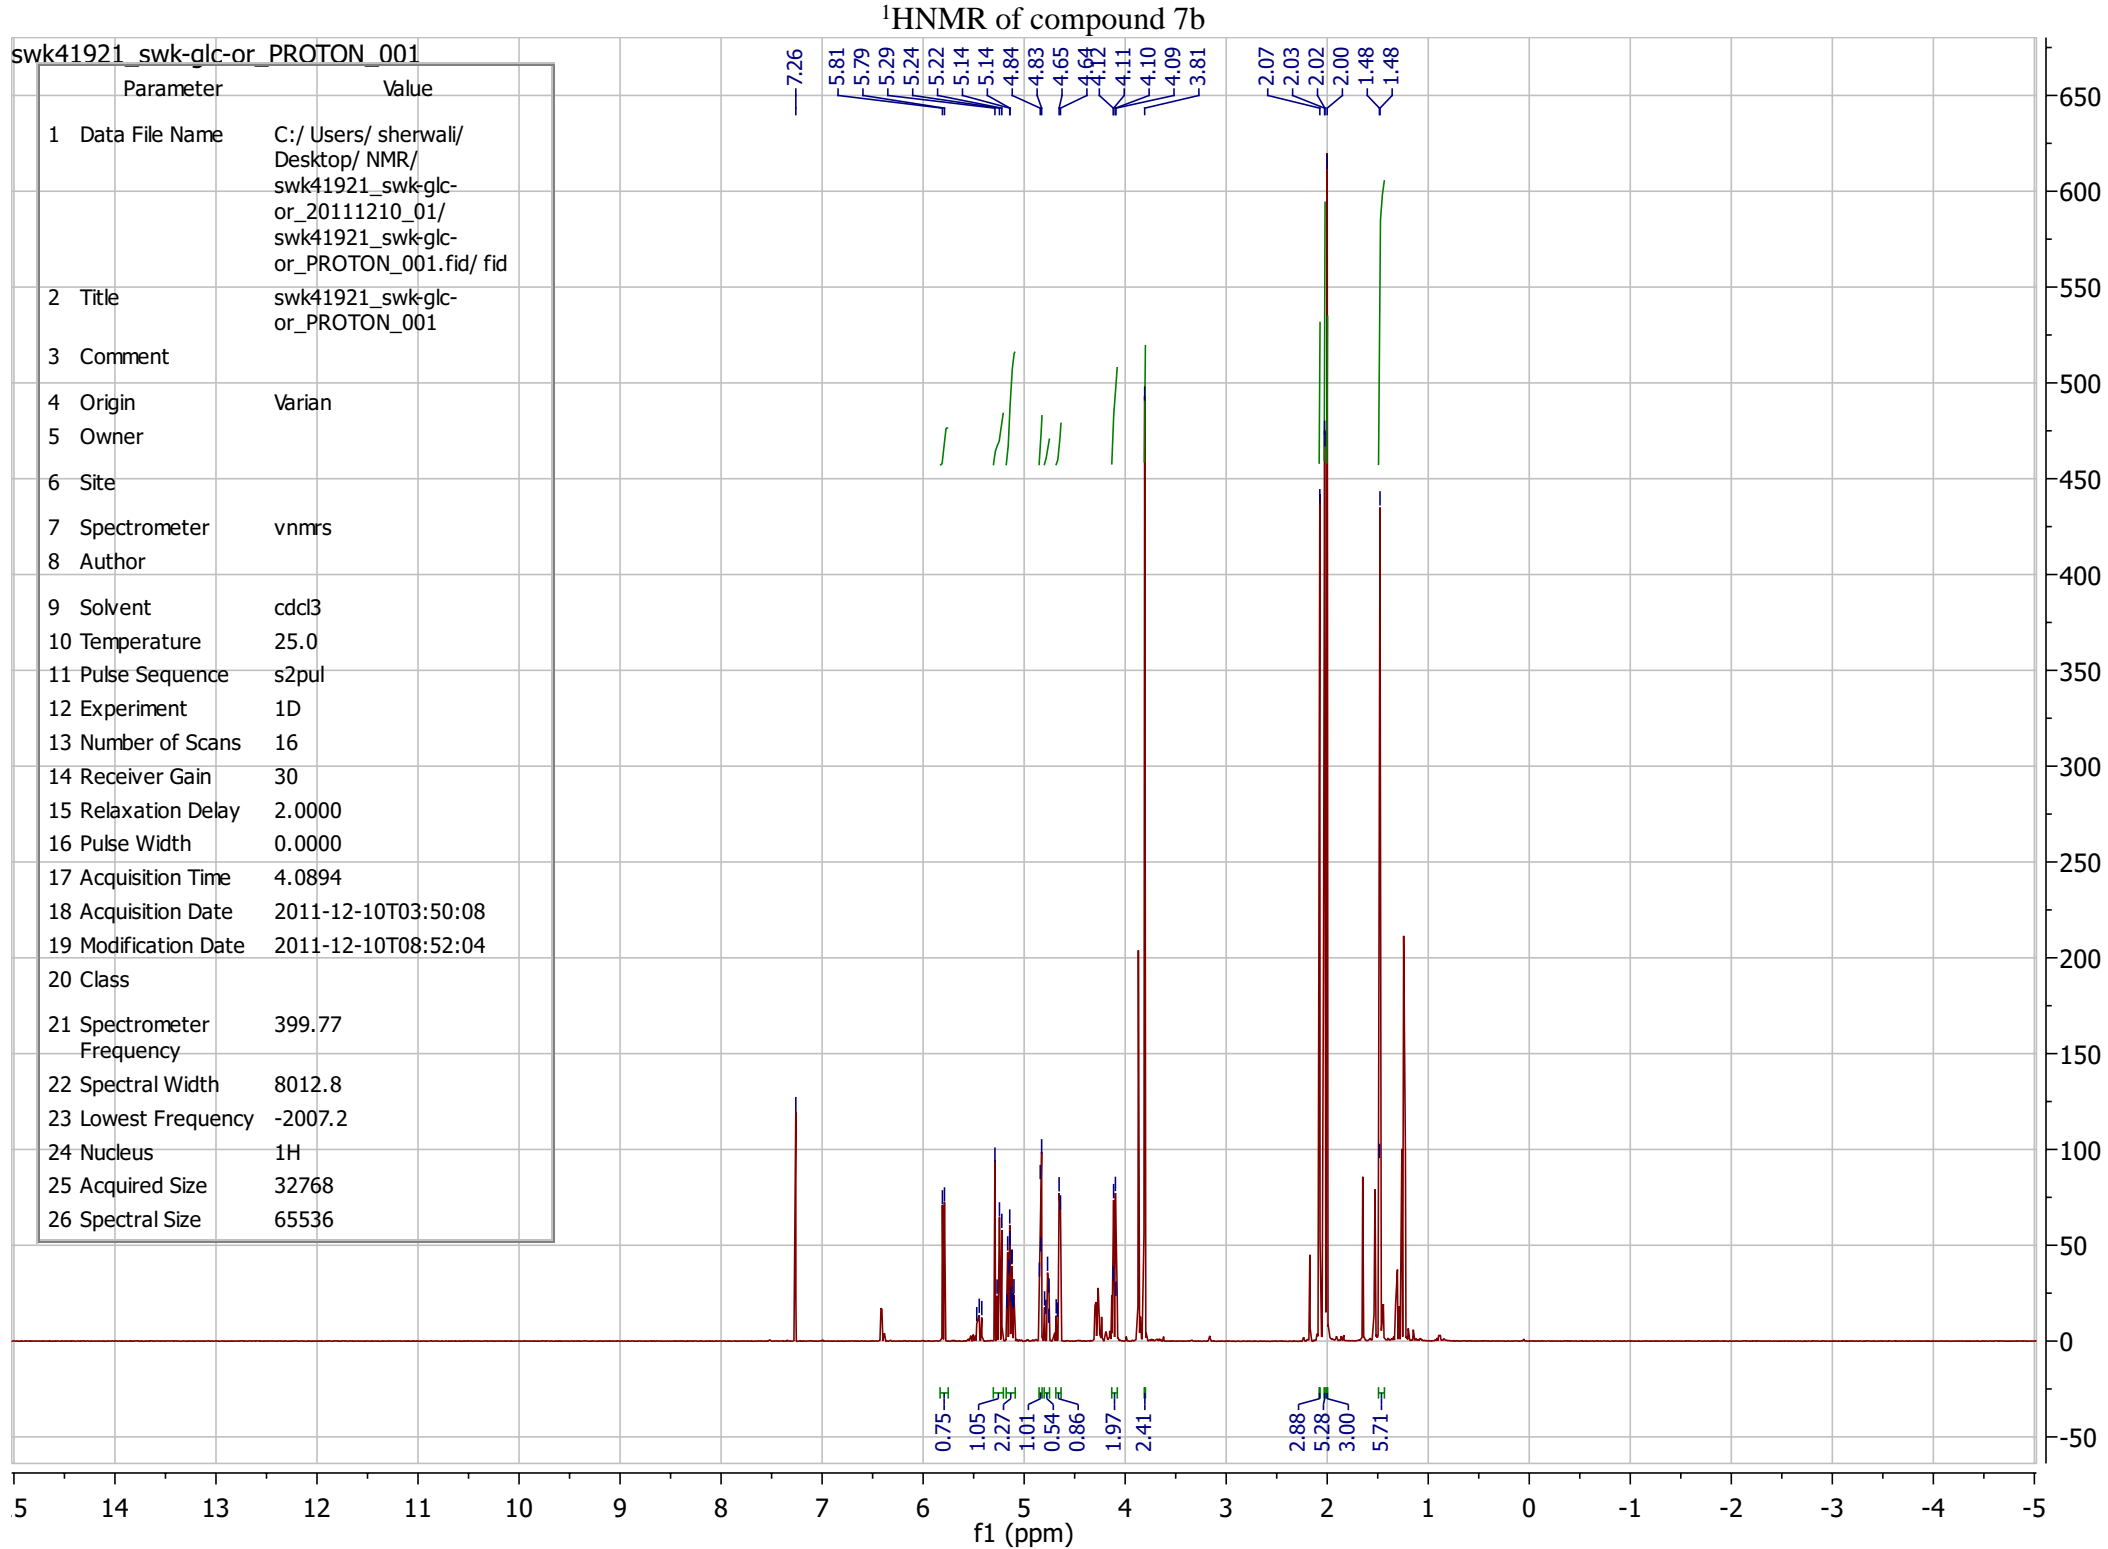

Supplement: f1 [file 9648710.f1.zip]

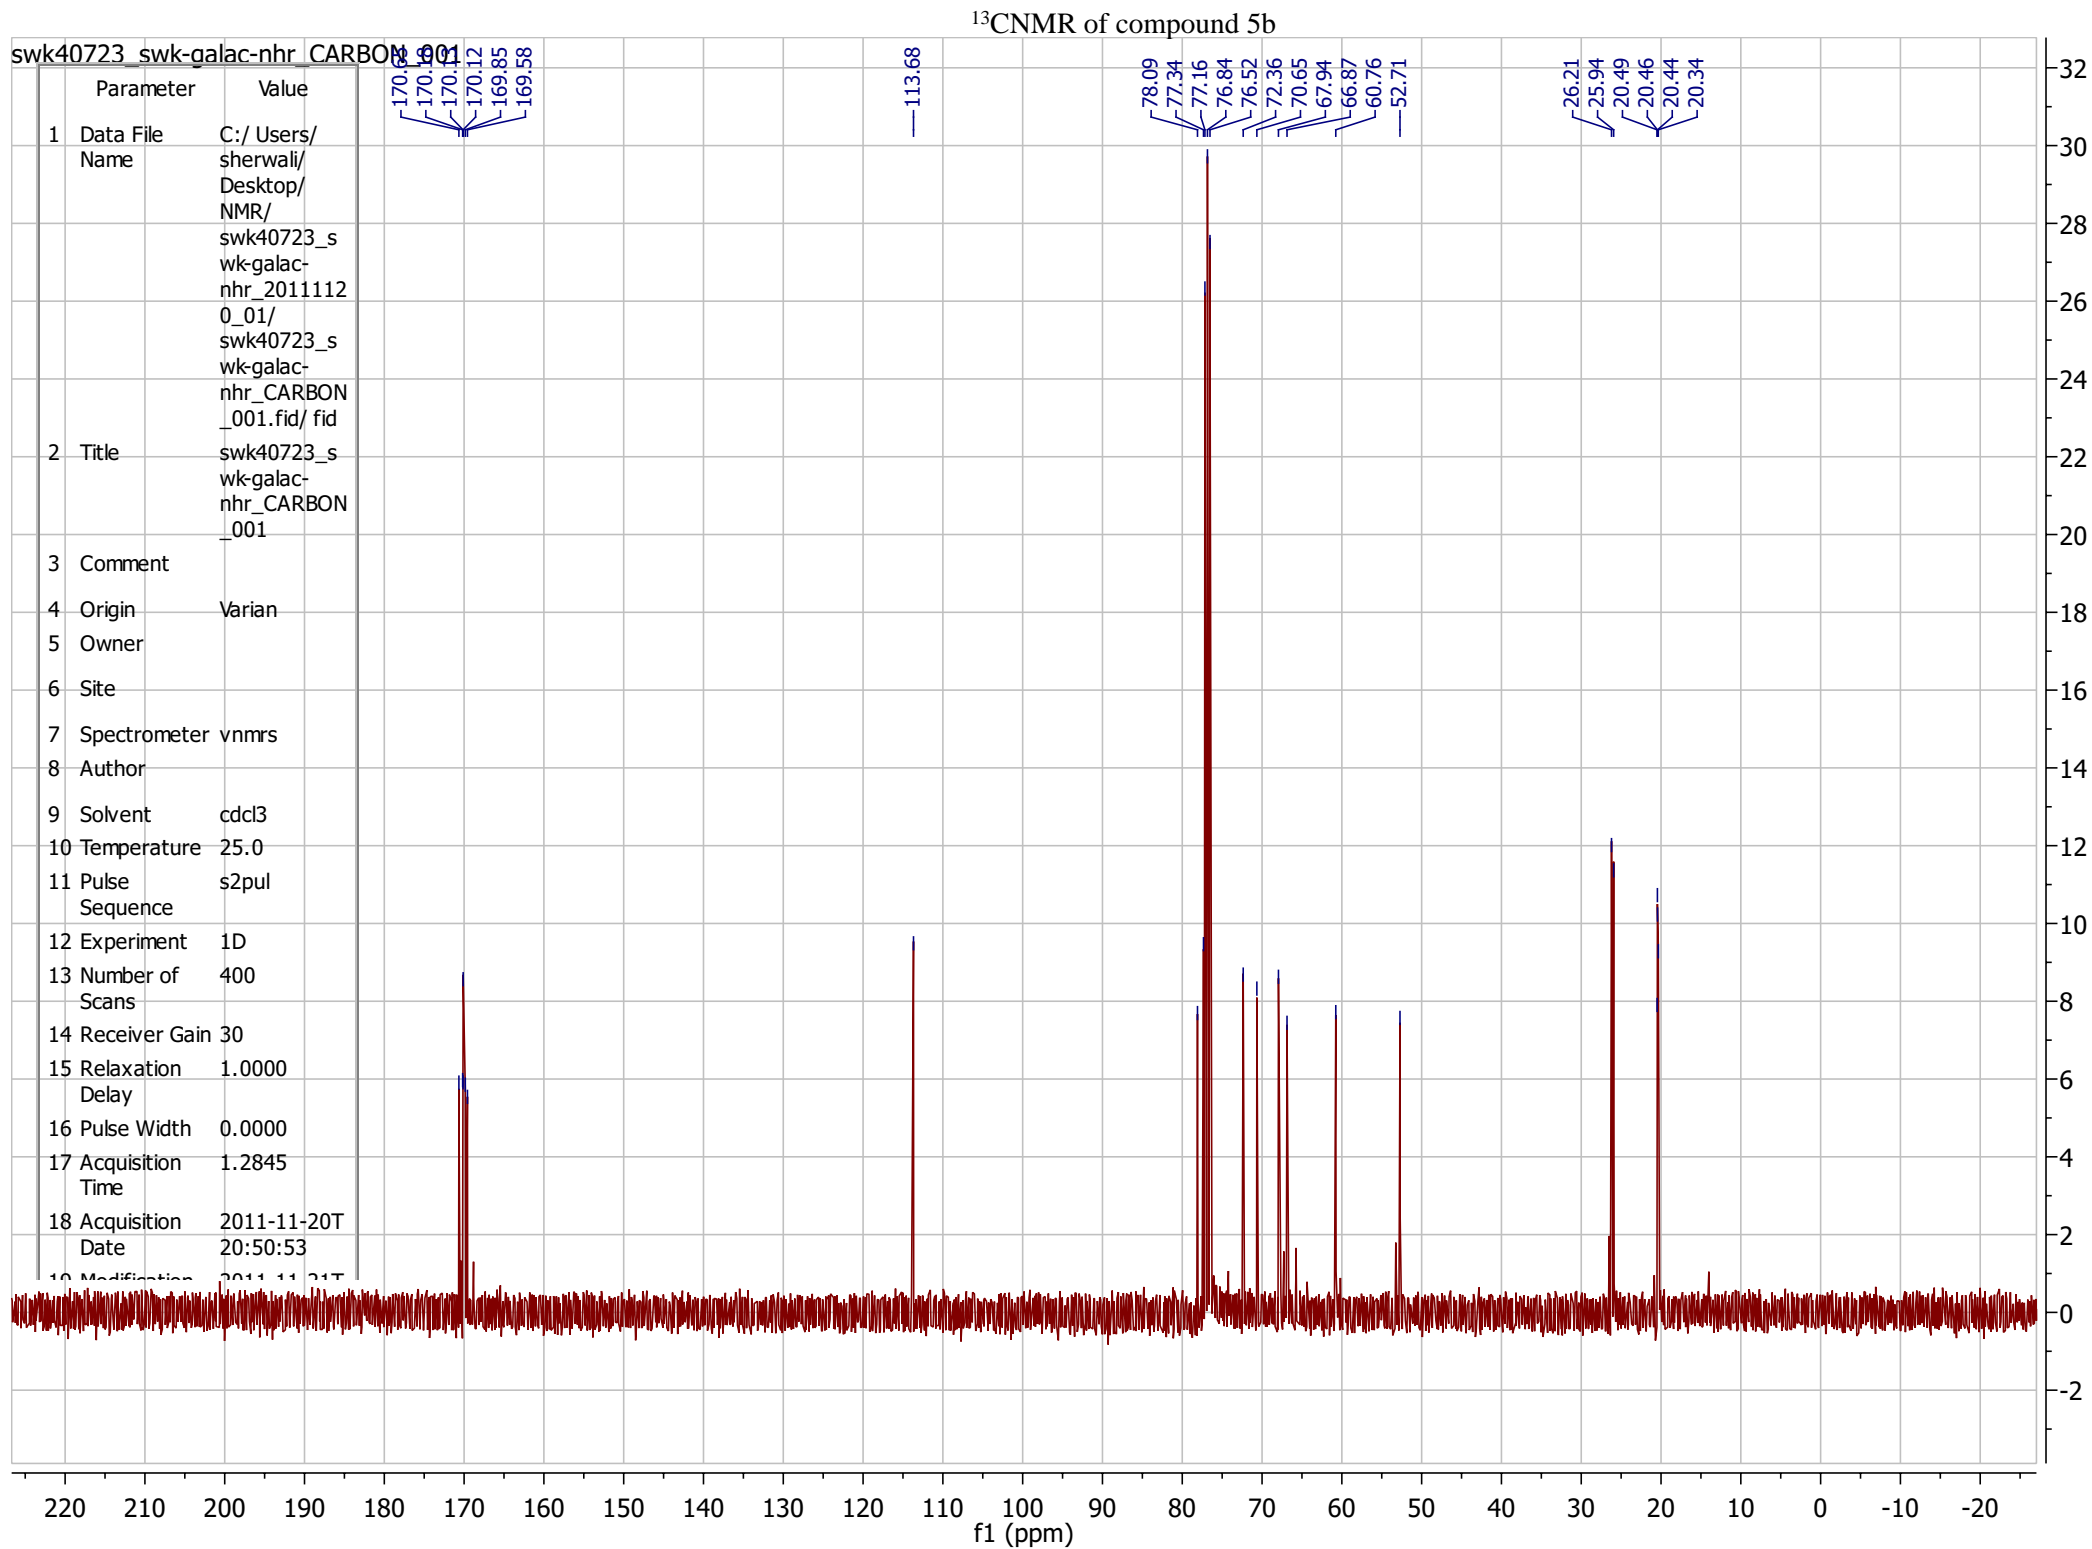

Supplement: f1 [file 9648710.f1.zip]

<sup>13</sup>CNMR of compound 5d

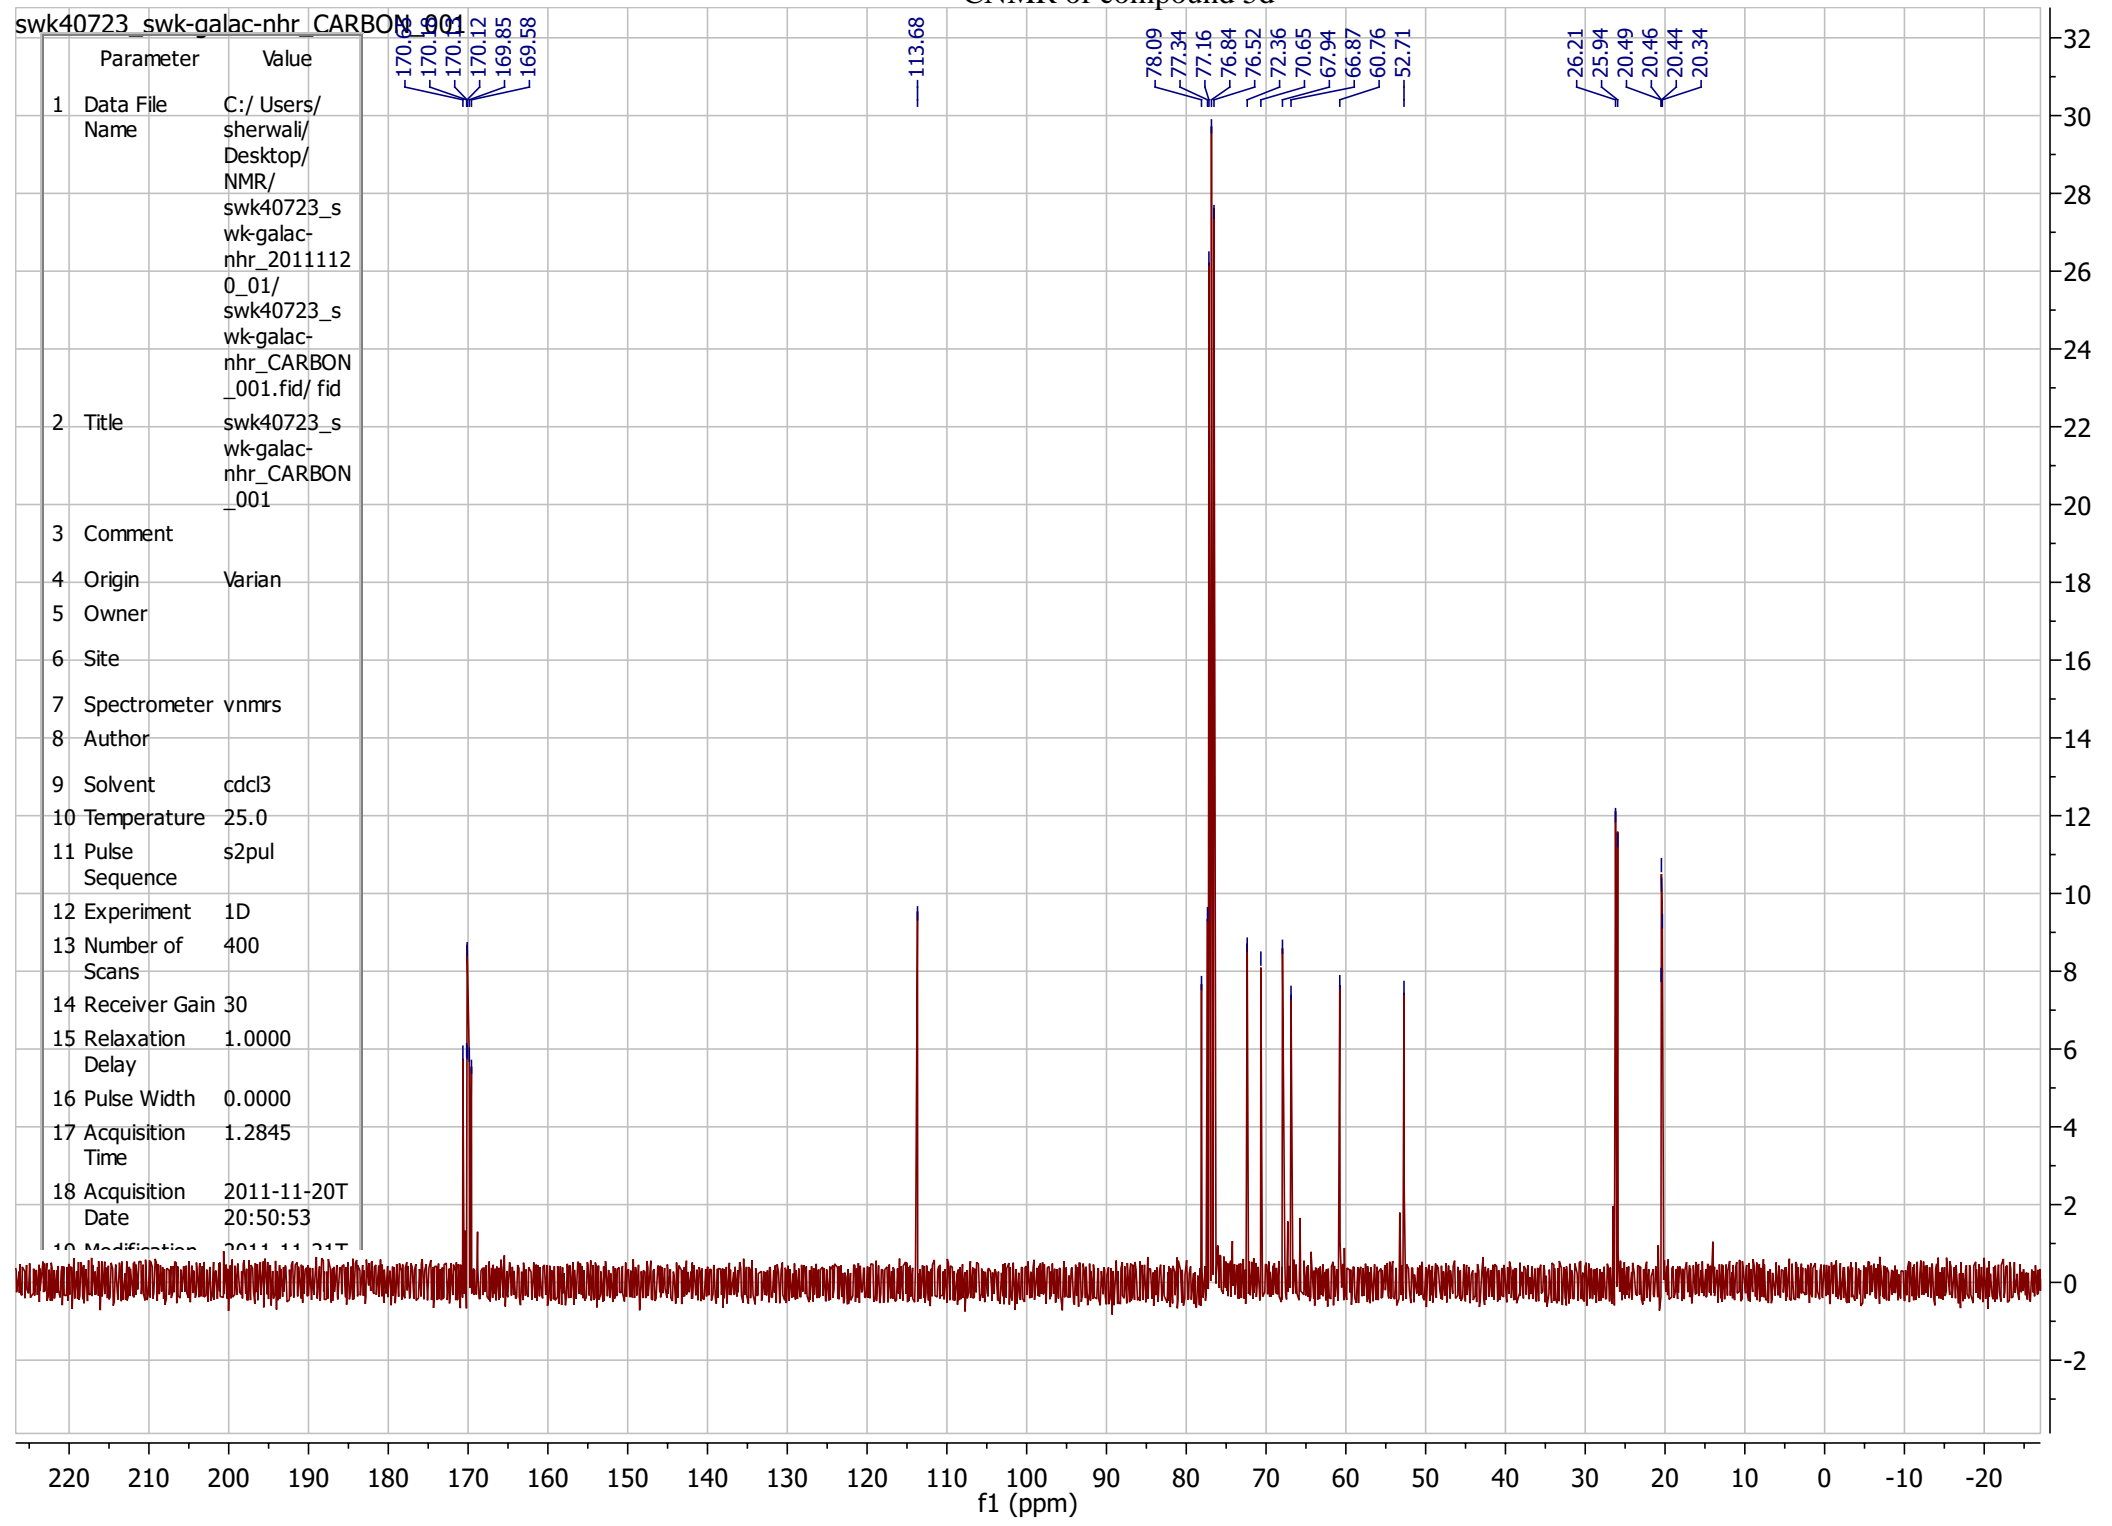

Supplement: f1 [file 9648710.f1.zip]

swk39955\_swk-glc-nhr\_PROTON\_001

<sup>1</sup>HNMR of compound 5a

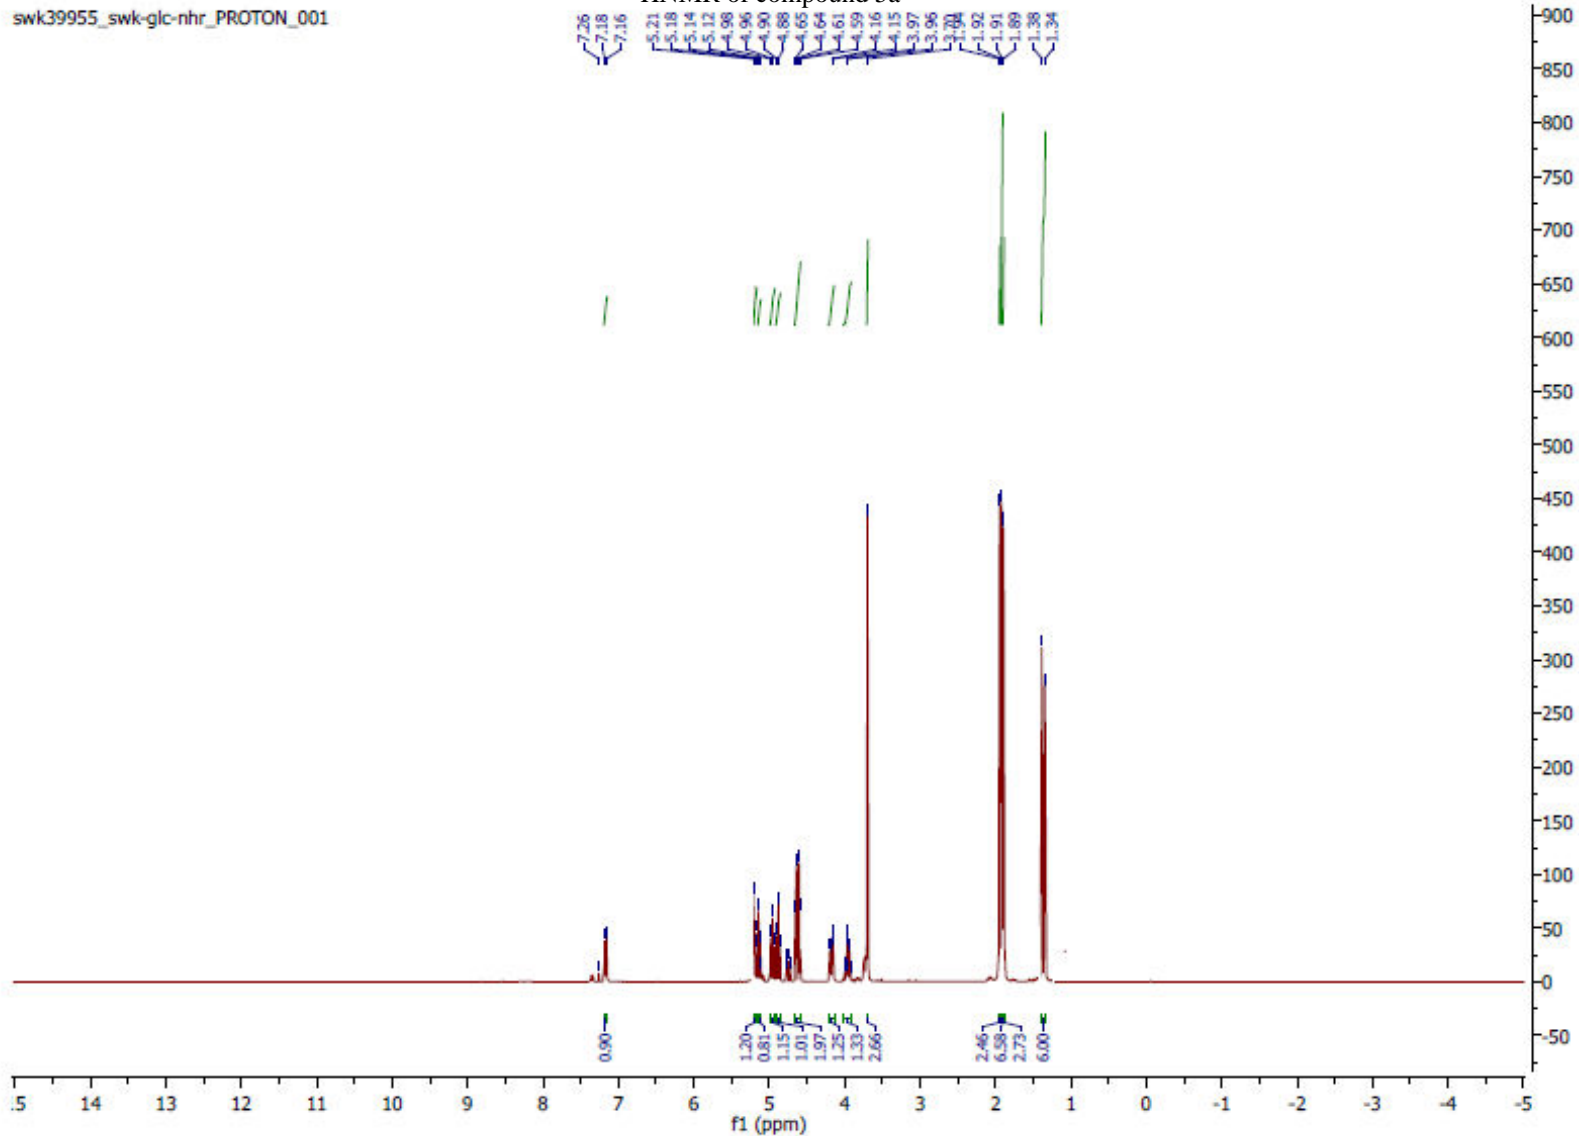

Supplement: f1 [file 9648710.f1.zip]

swk39955\_swk-glc-nhr\_PROTON\_001

<sup>1</sup>HNMR of compound 5c

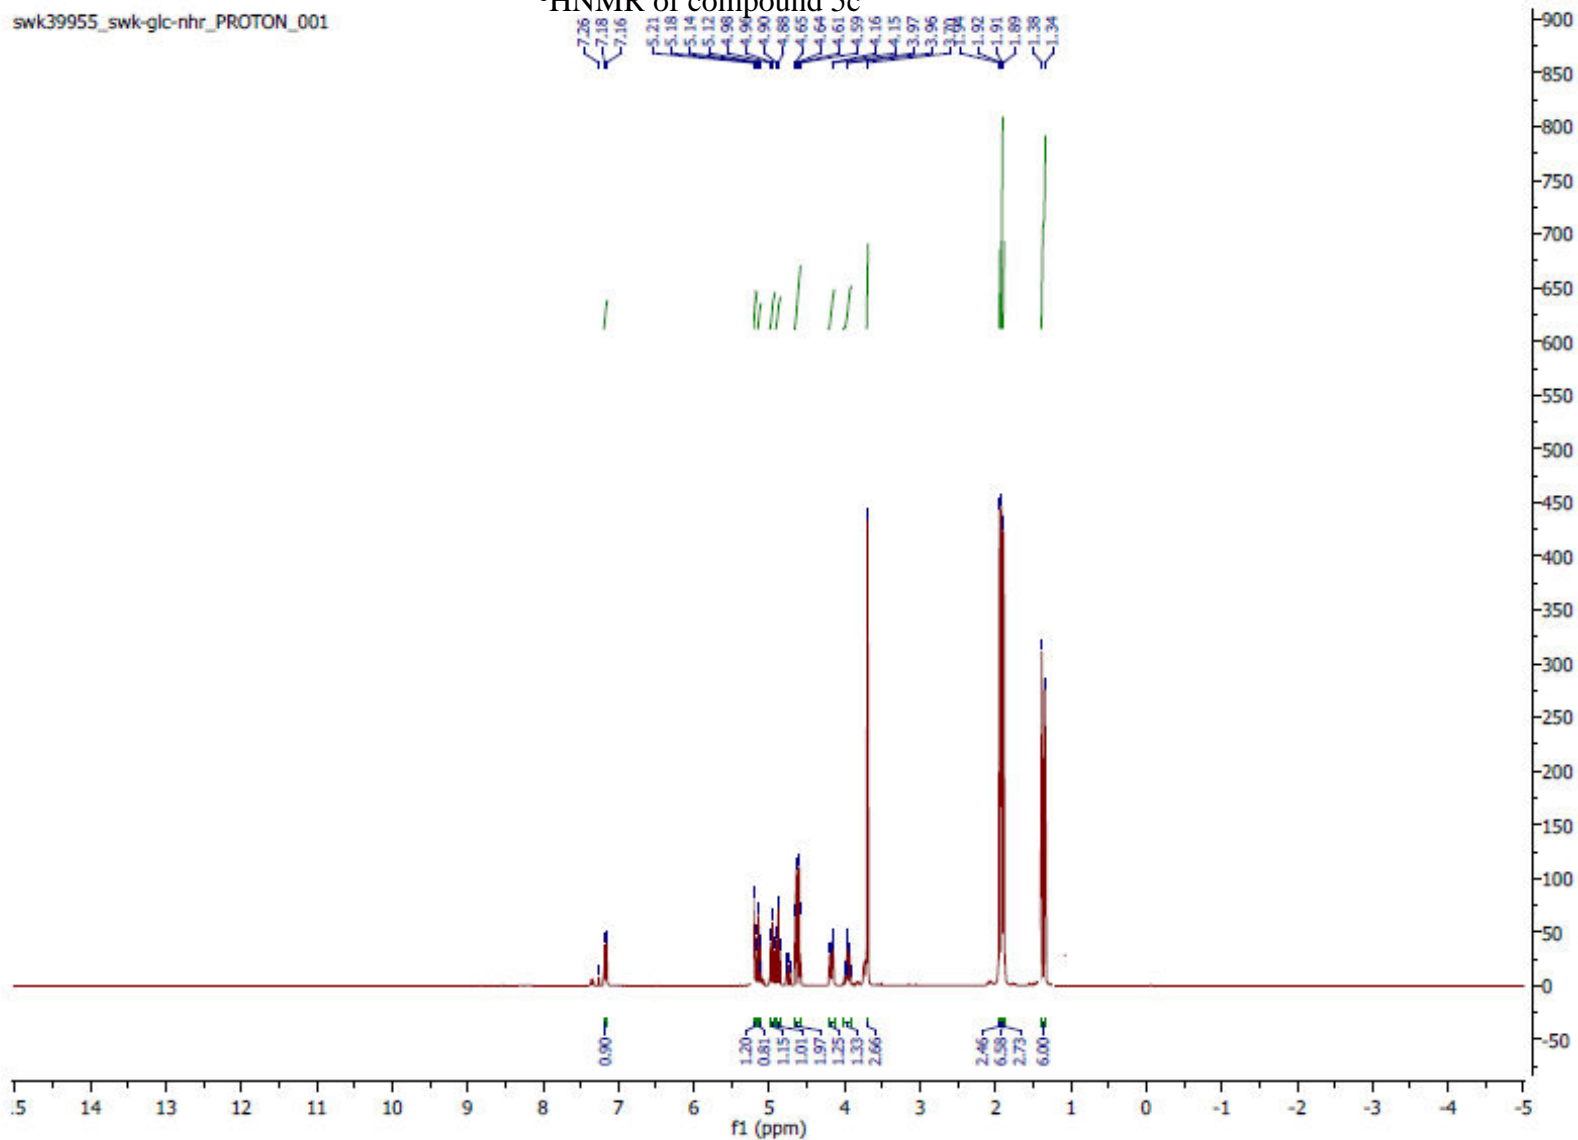

Supplement: f1 [file 9648710.f1.zip › 9648710.f1/5c/1HNMR, compound 5c.pdf]

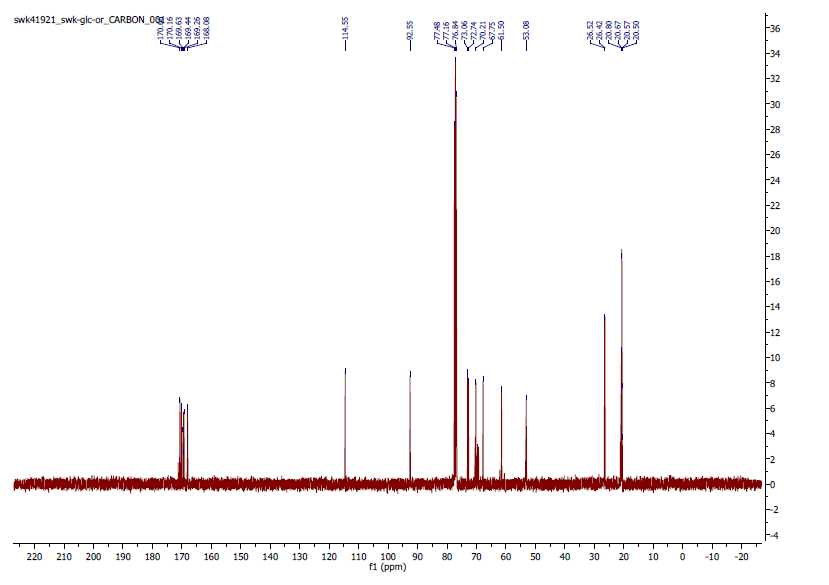

Supplement: f1 [file 9648710.f1.zip › 9648710.f1/7a/13CNMR, compound 7a.png]

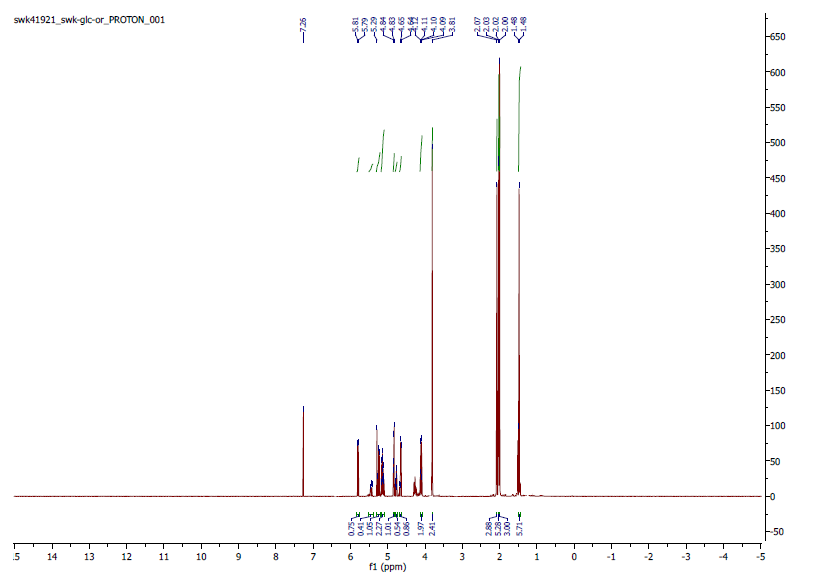

Supplement: f1 [file 9648710.f1.zip › 9648710.f1/7a/1HNMR, compound 7a.png]

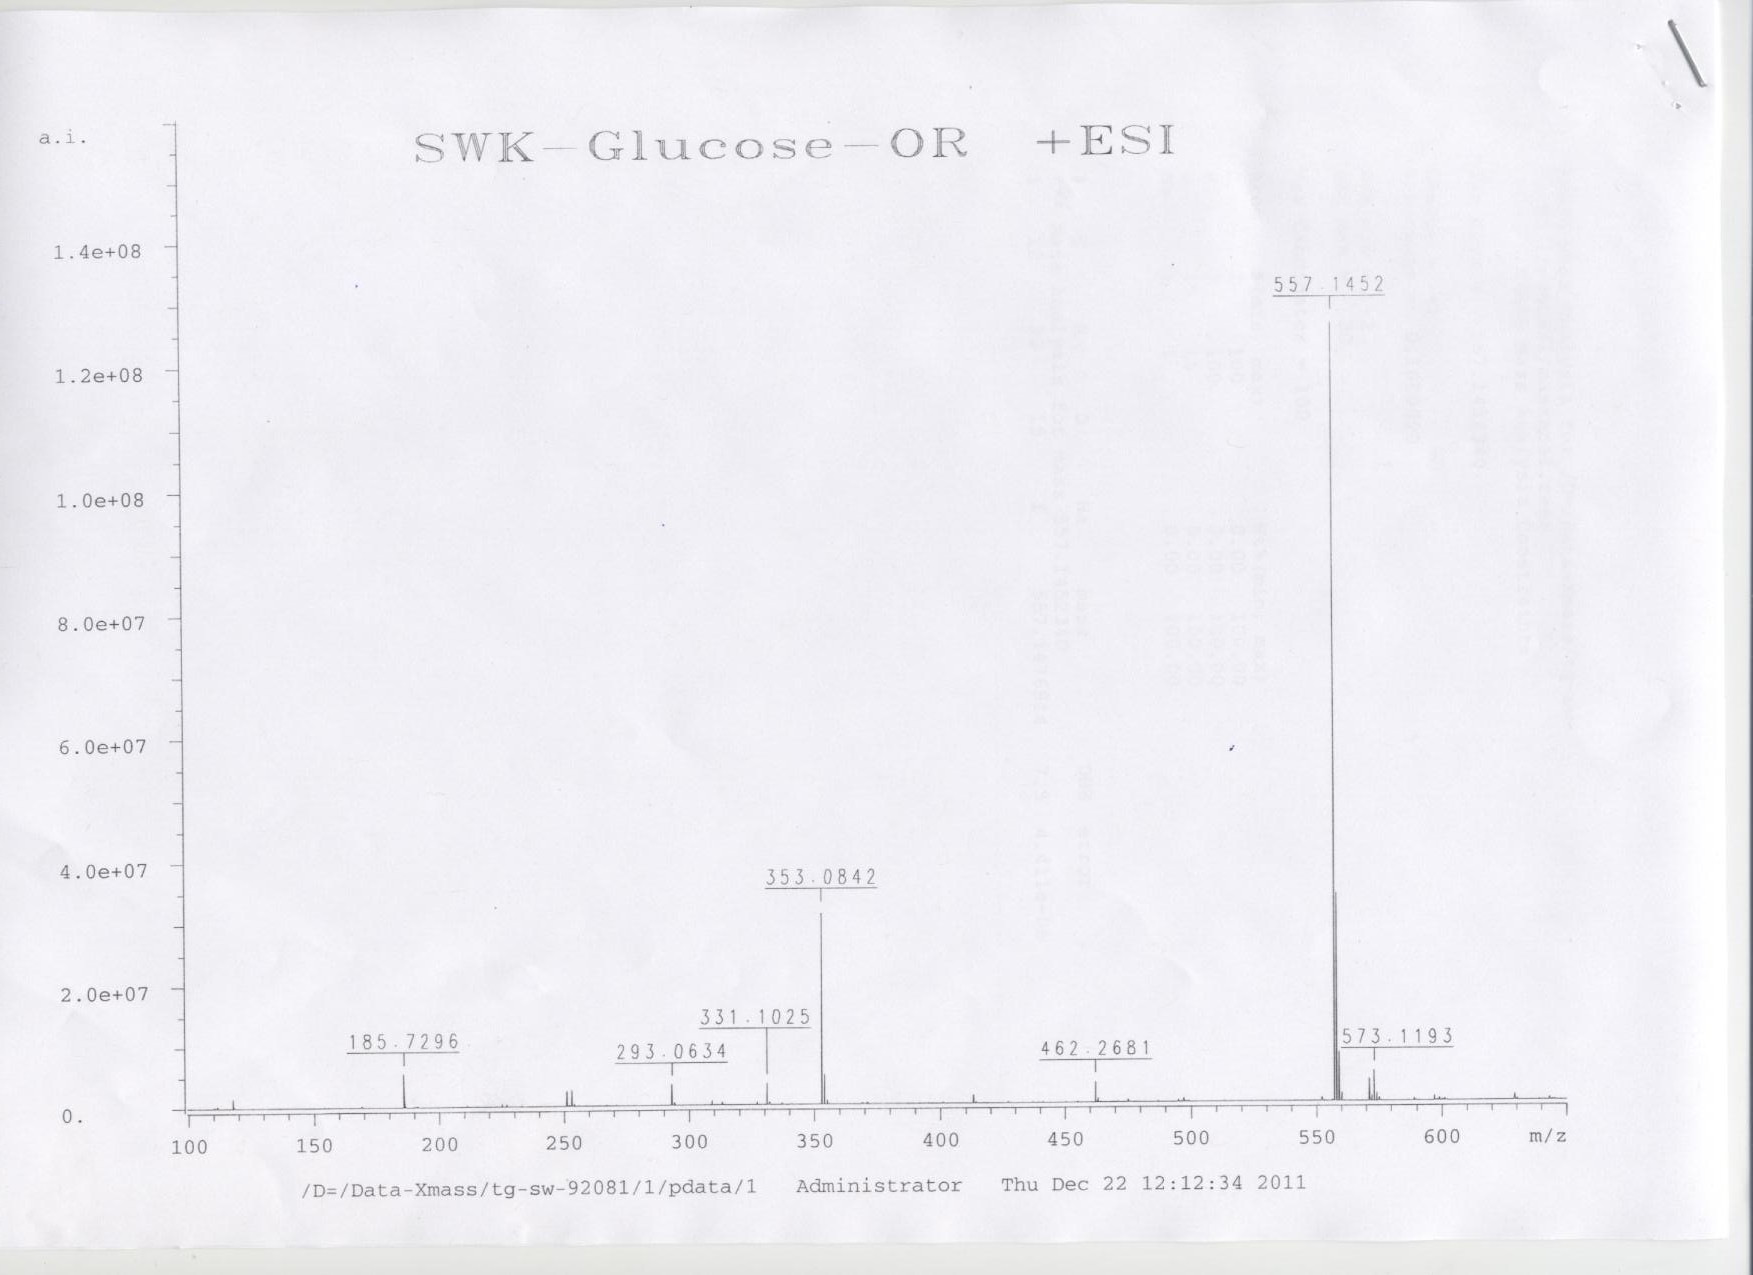

Supplement: f1 [file 9648710.f1.zip › 9648710.f1/7a/MS, compound 7a.jpg]

ESI-MS of compound 7a

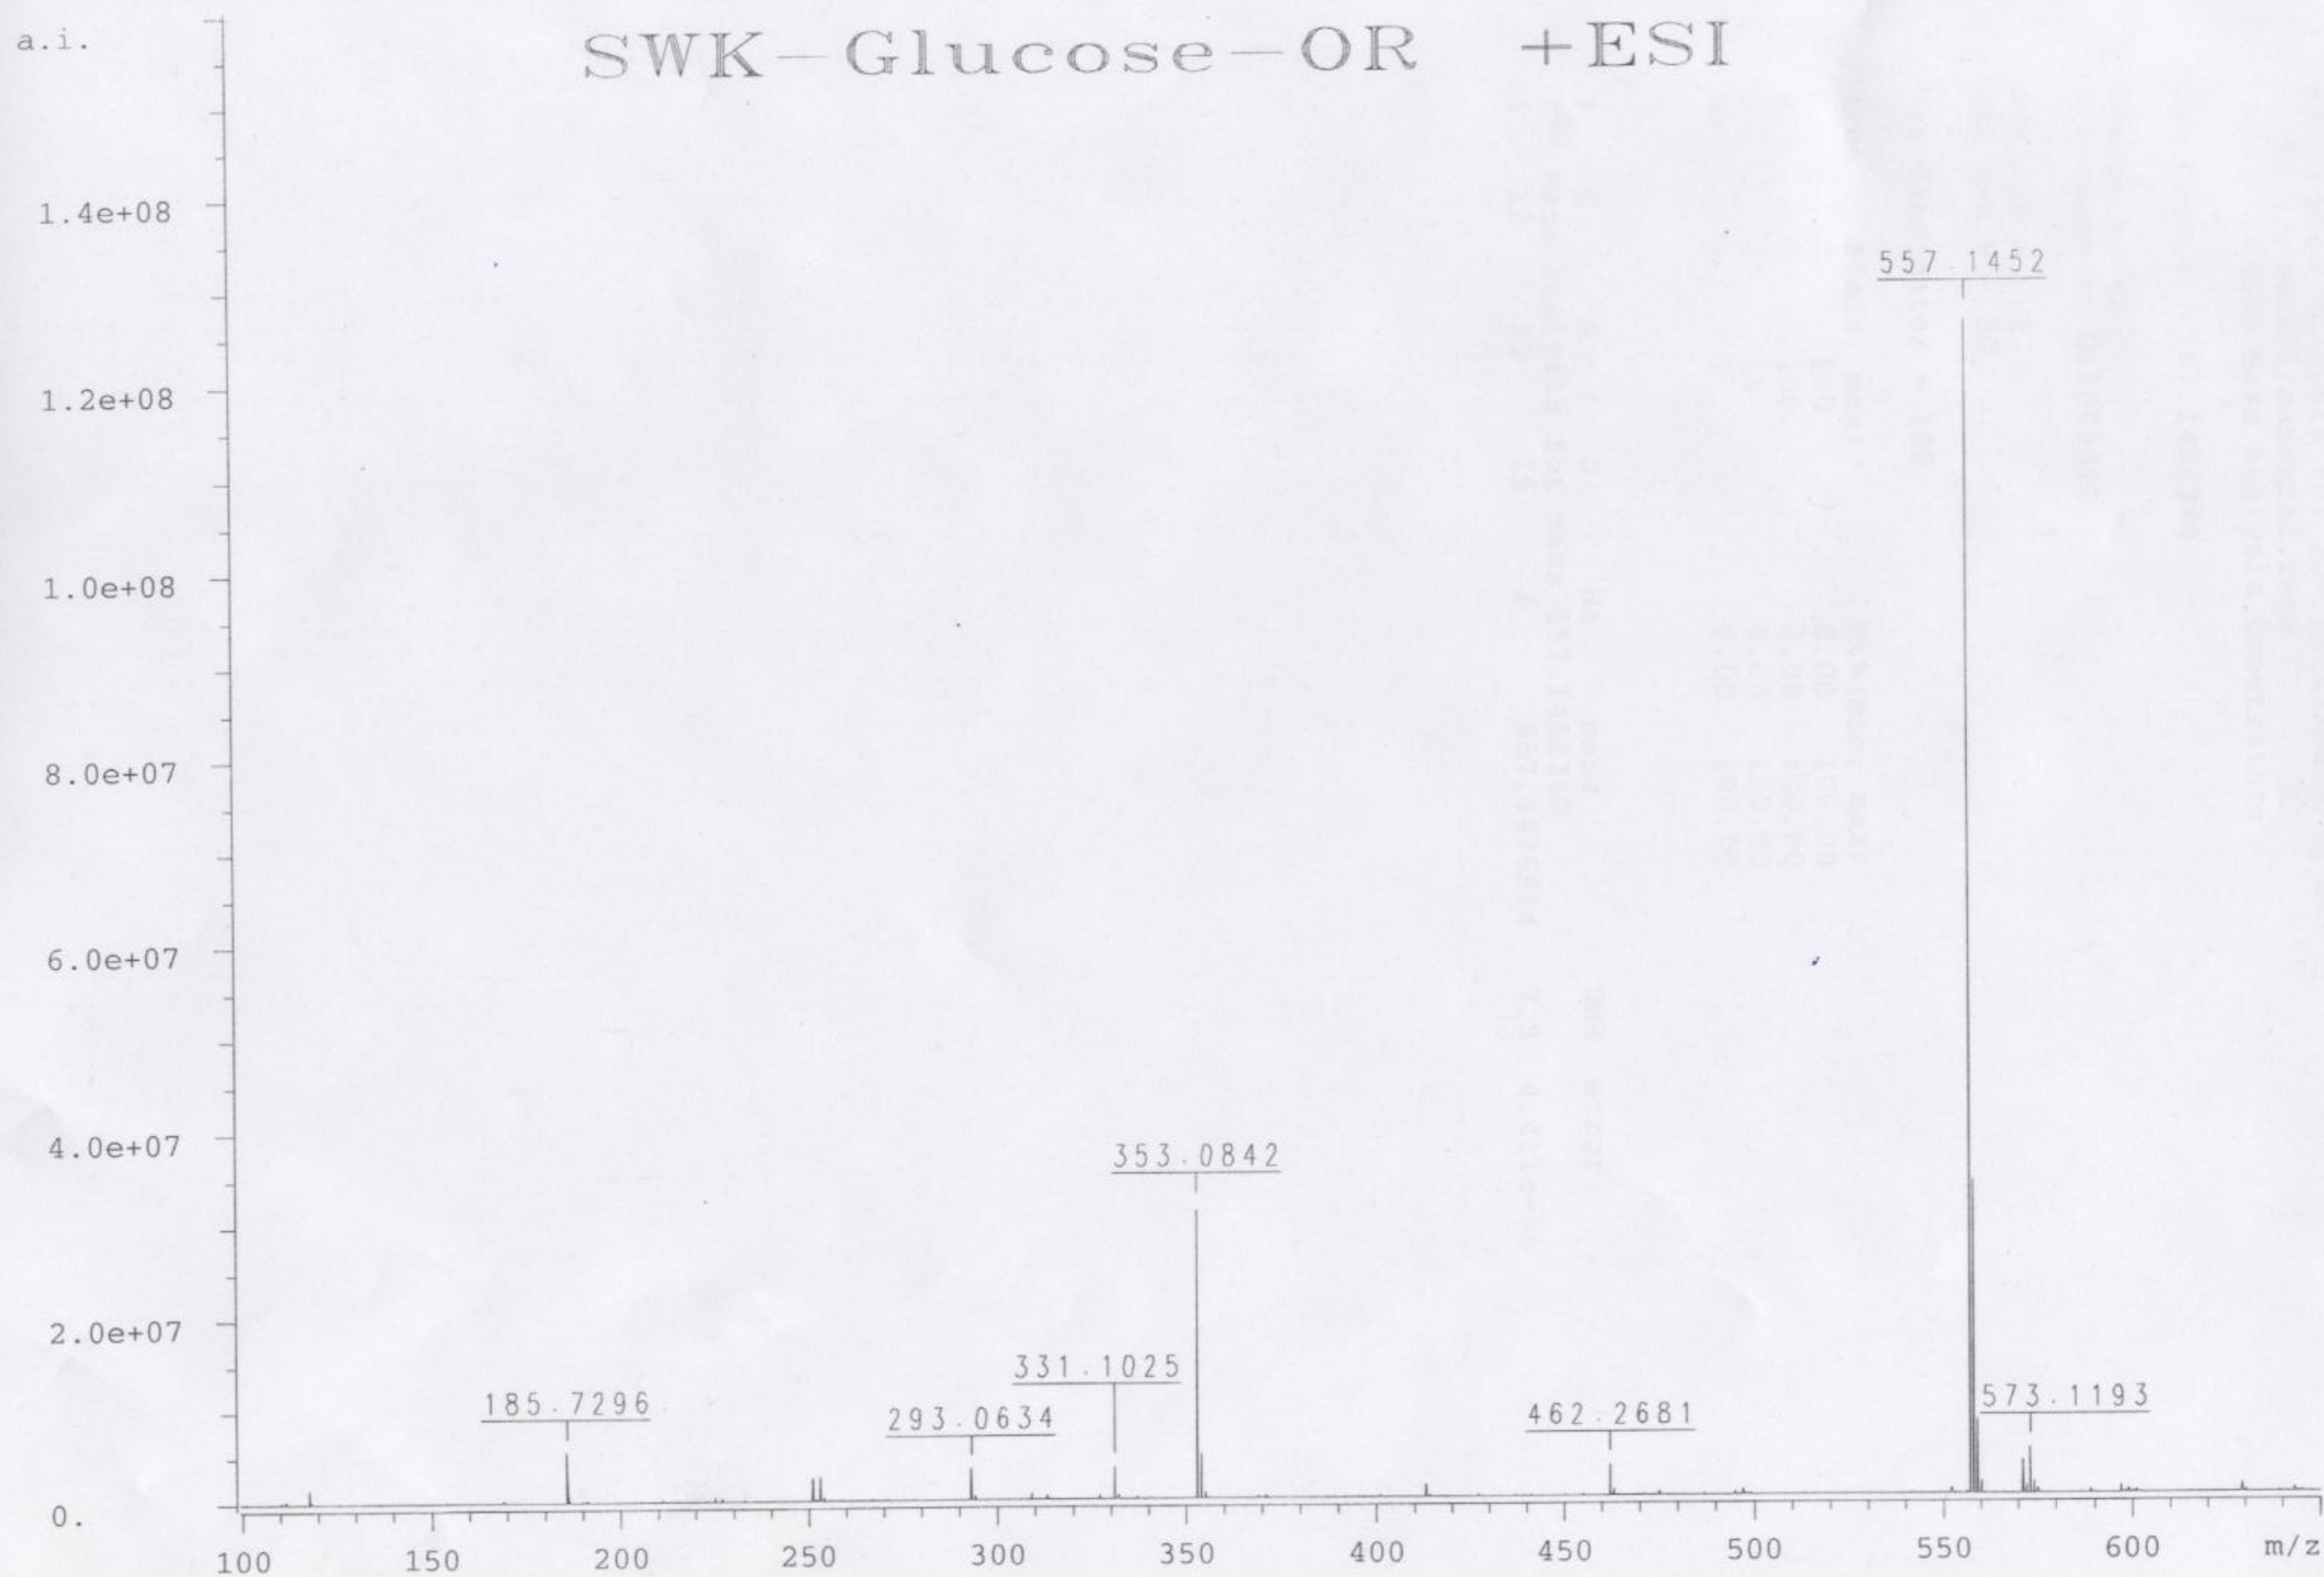

Supplement: f1 [file 9648710.f1.zip › 9648710.f1/7a/MS, compound 7a.pdf]

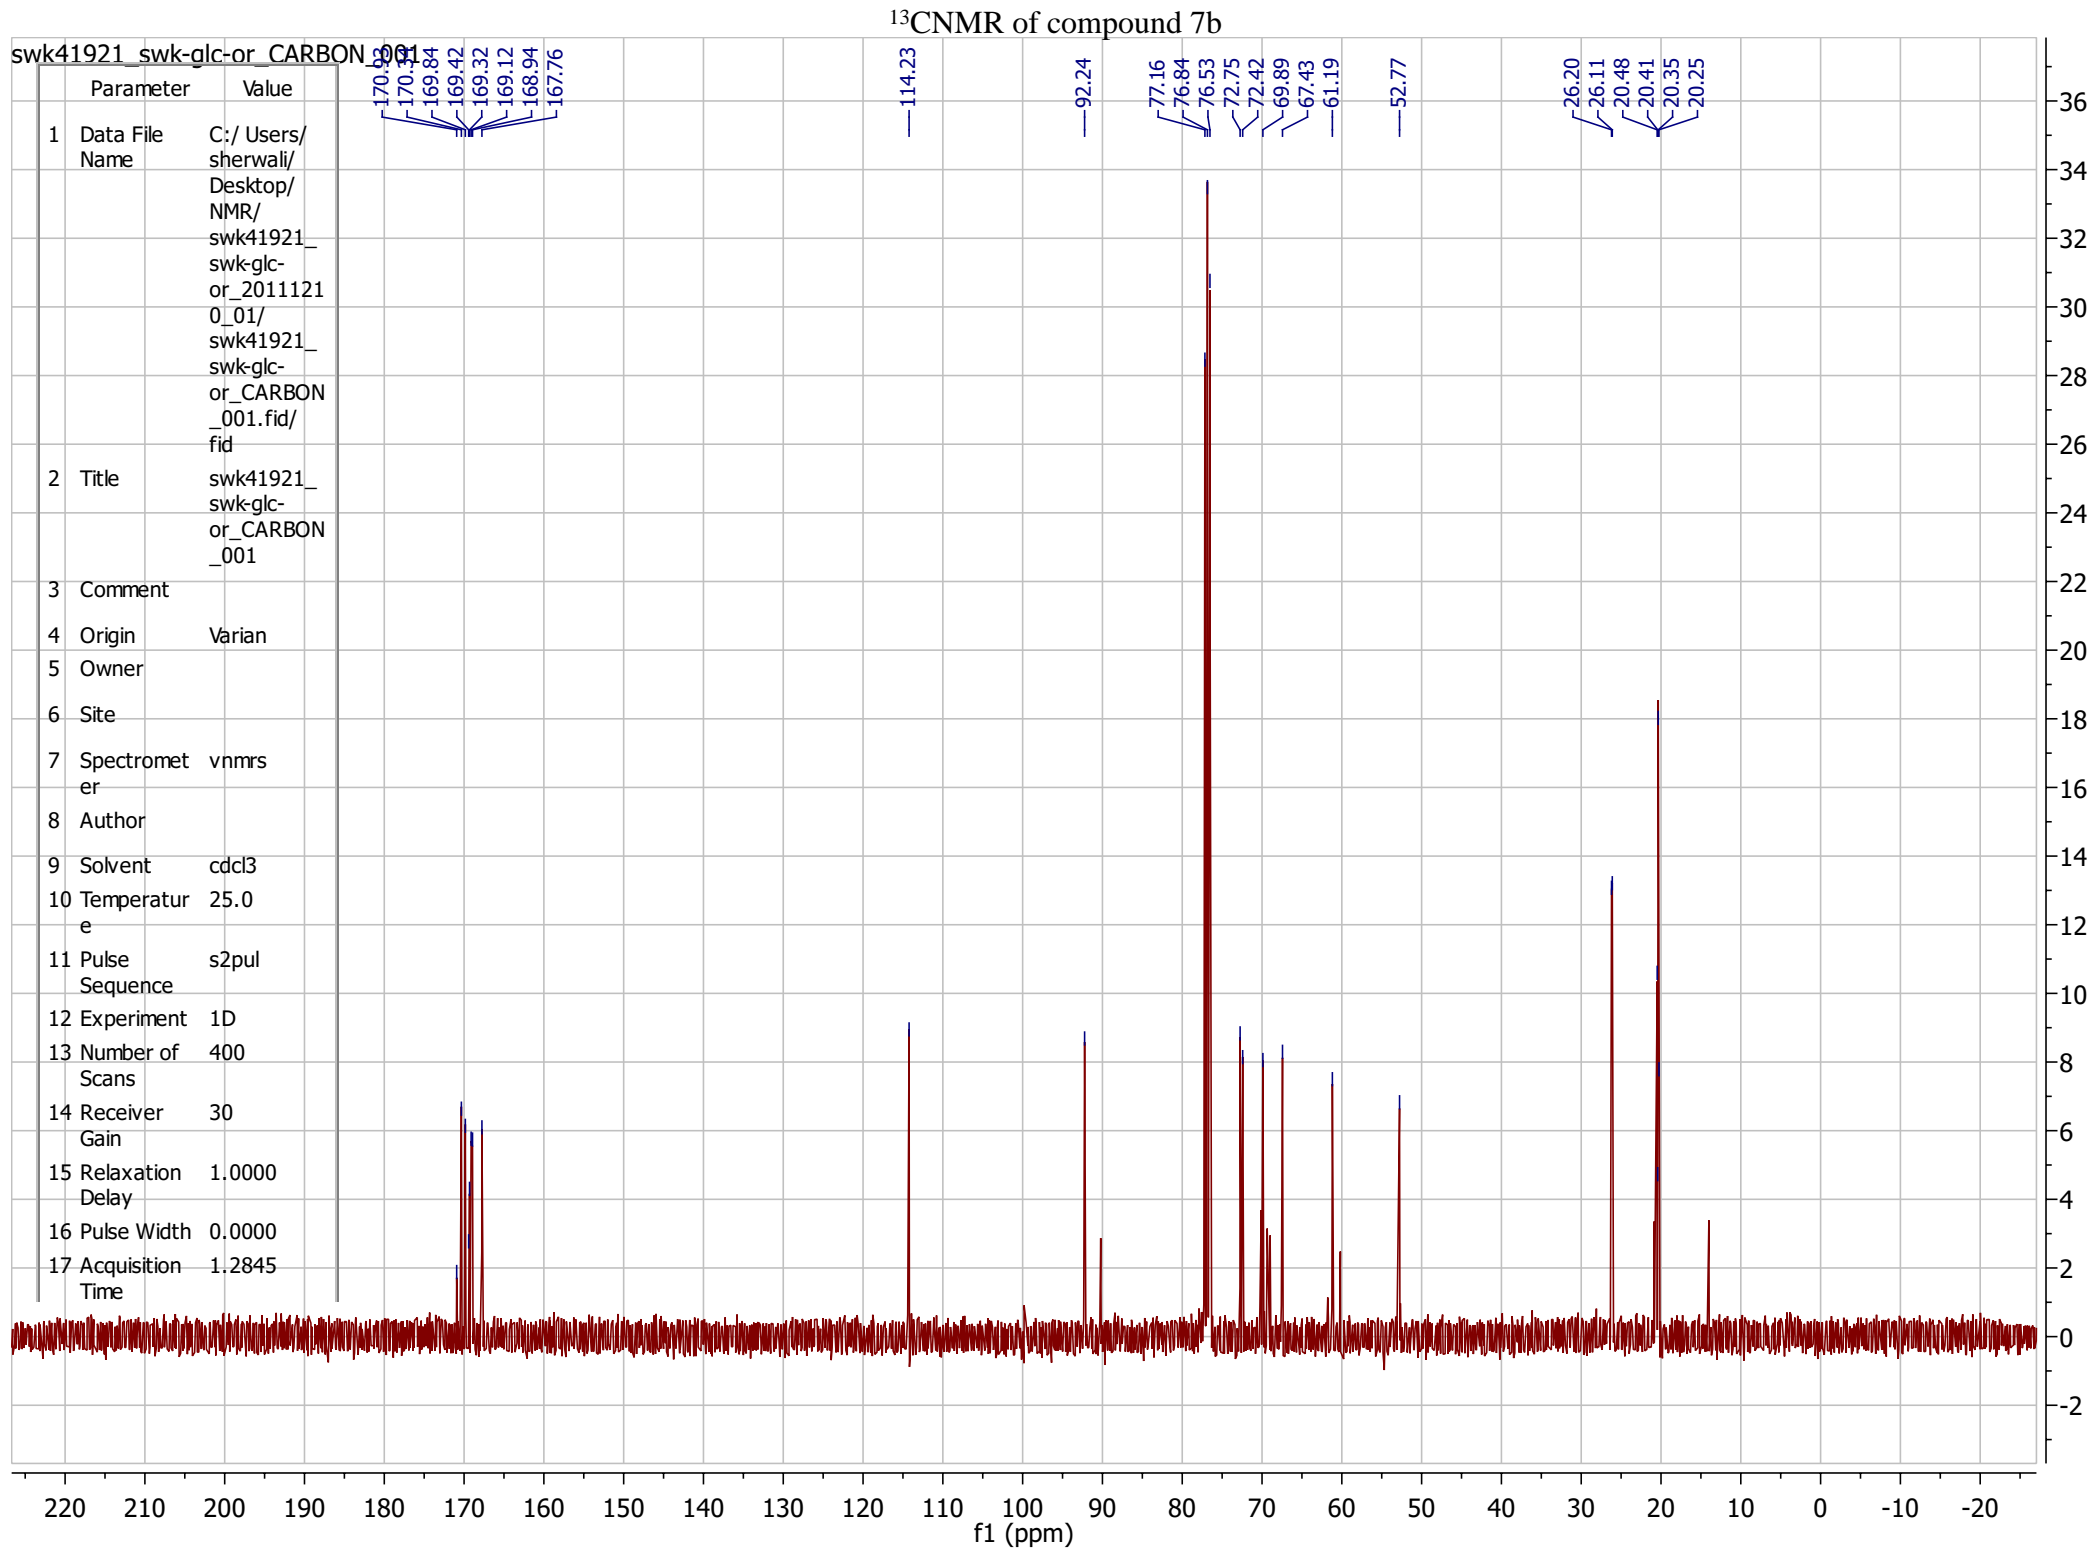

Supplement: f1 [file 9648710.f1.zip › 9648710.f1/7b/13CNMR, compound 7b.pdf]

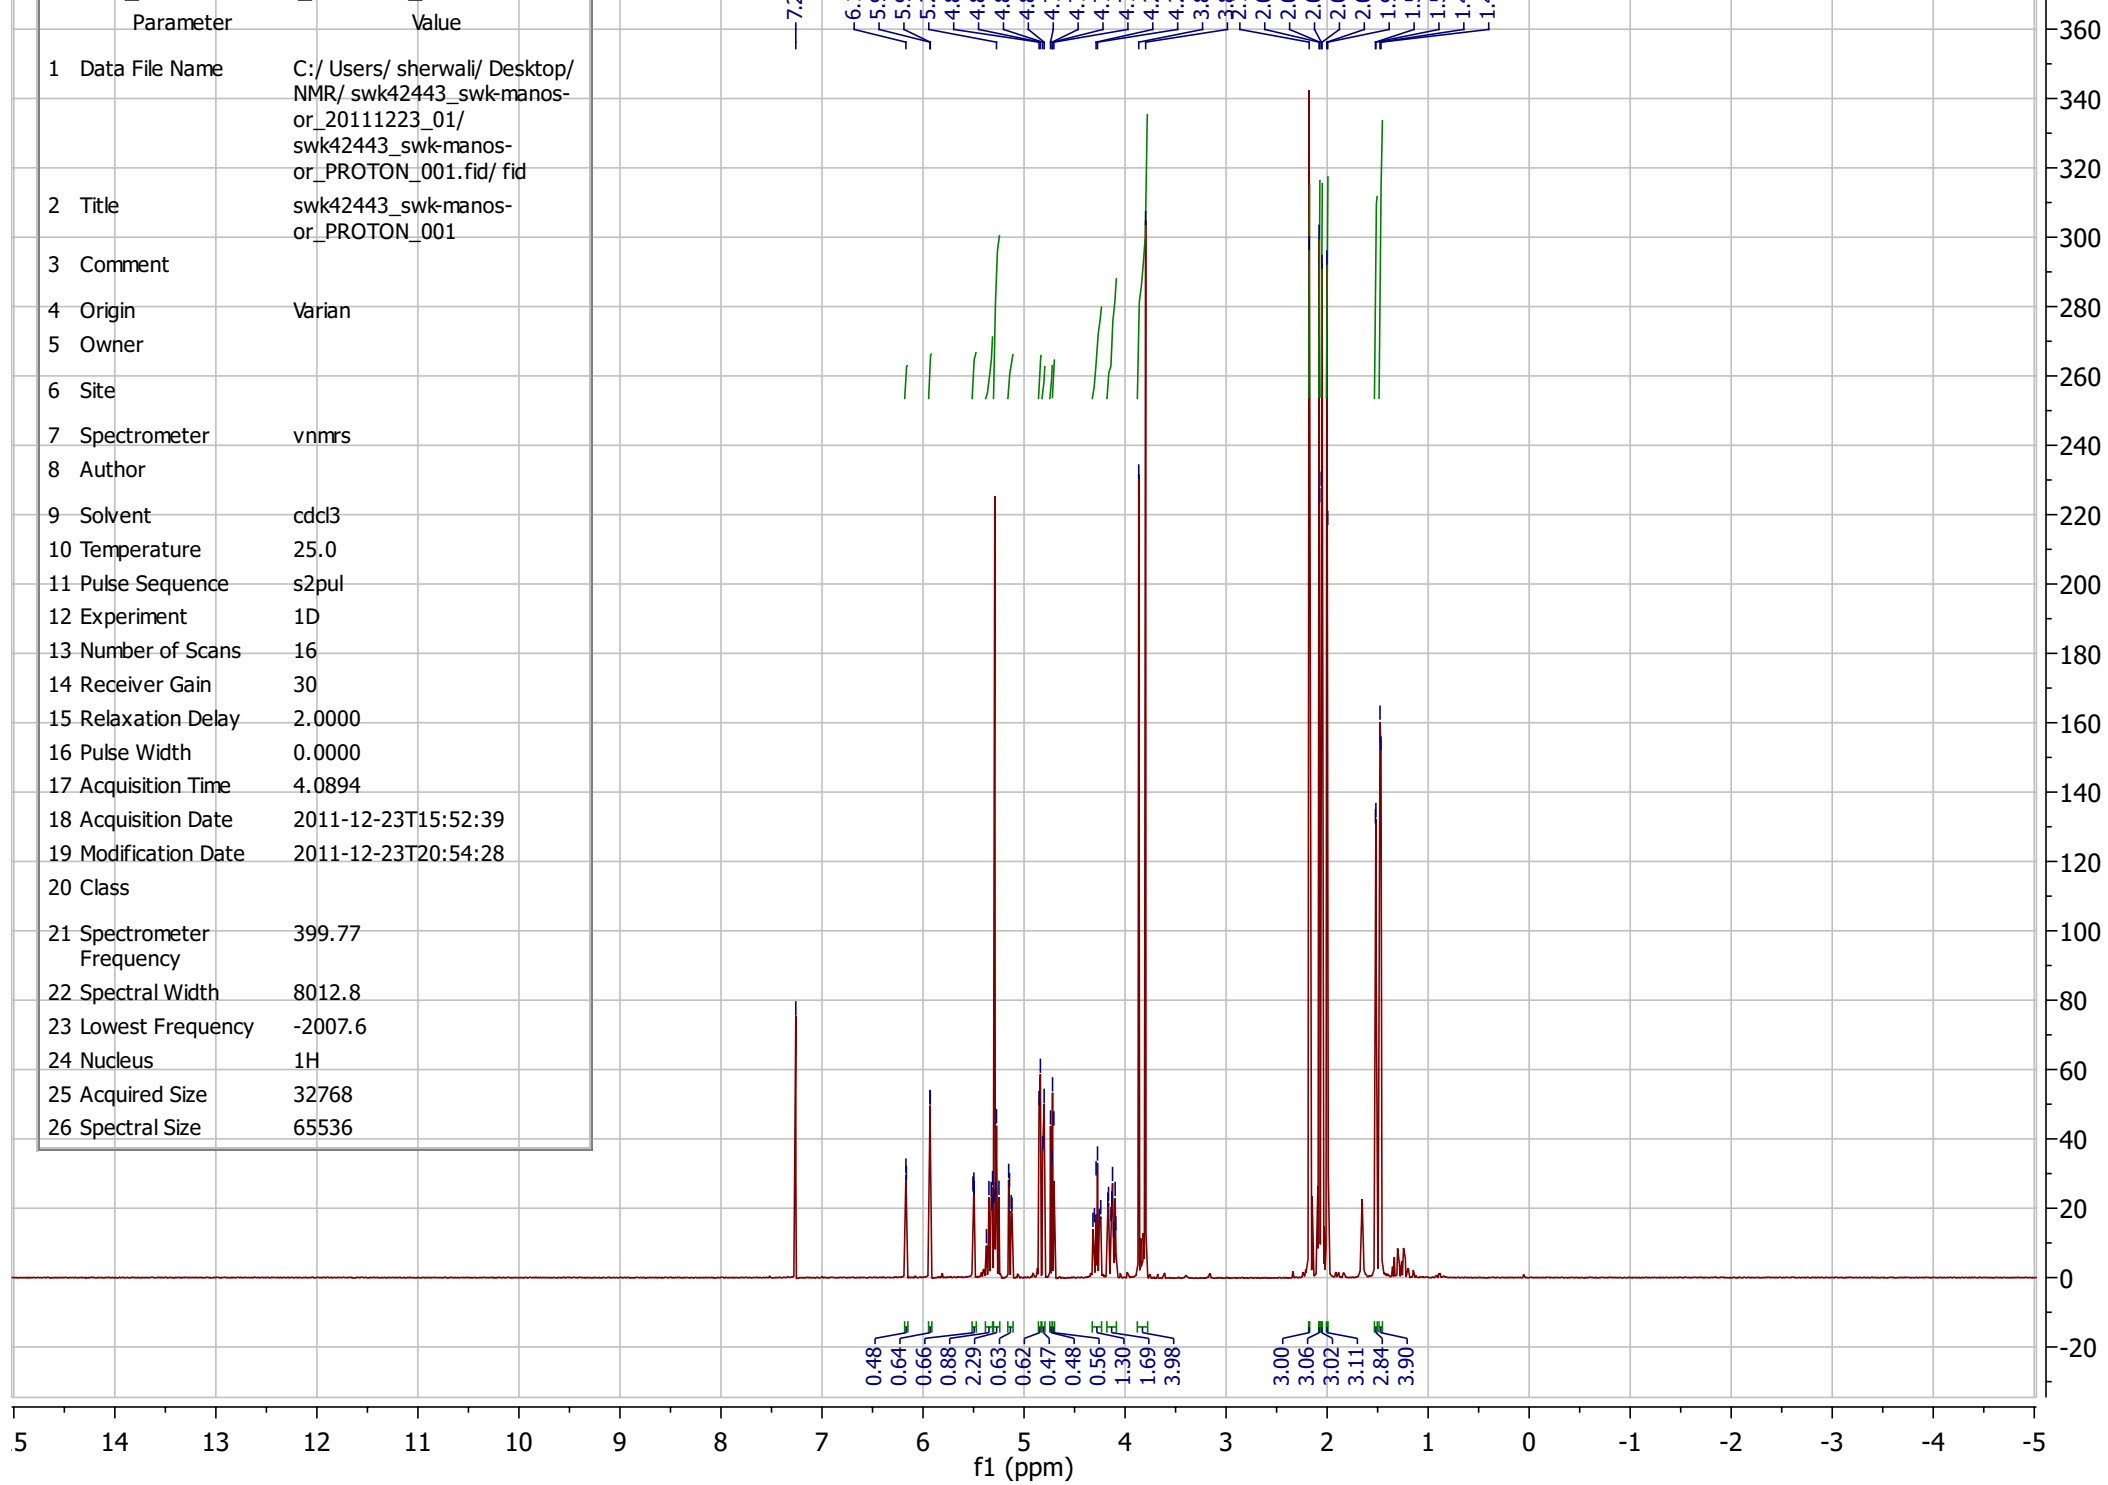

Supplement: f1 [file 9648710.f1.zip › 9648710.f1/7c/1HNMR, compound 7c.pdf]

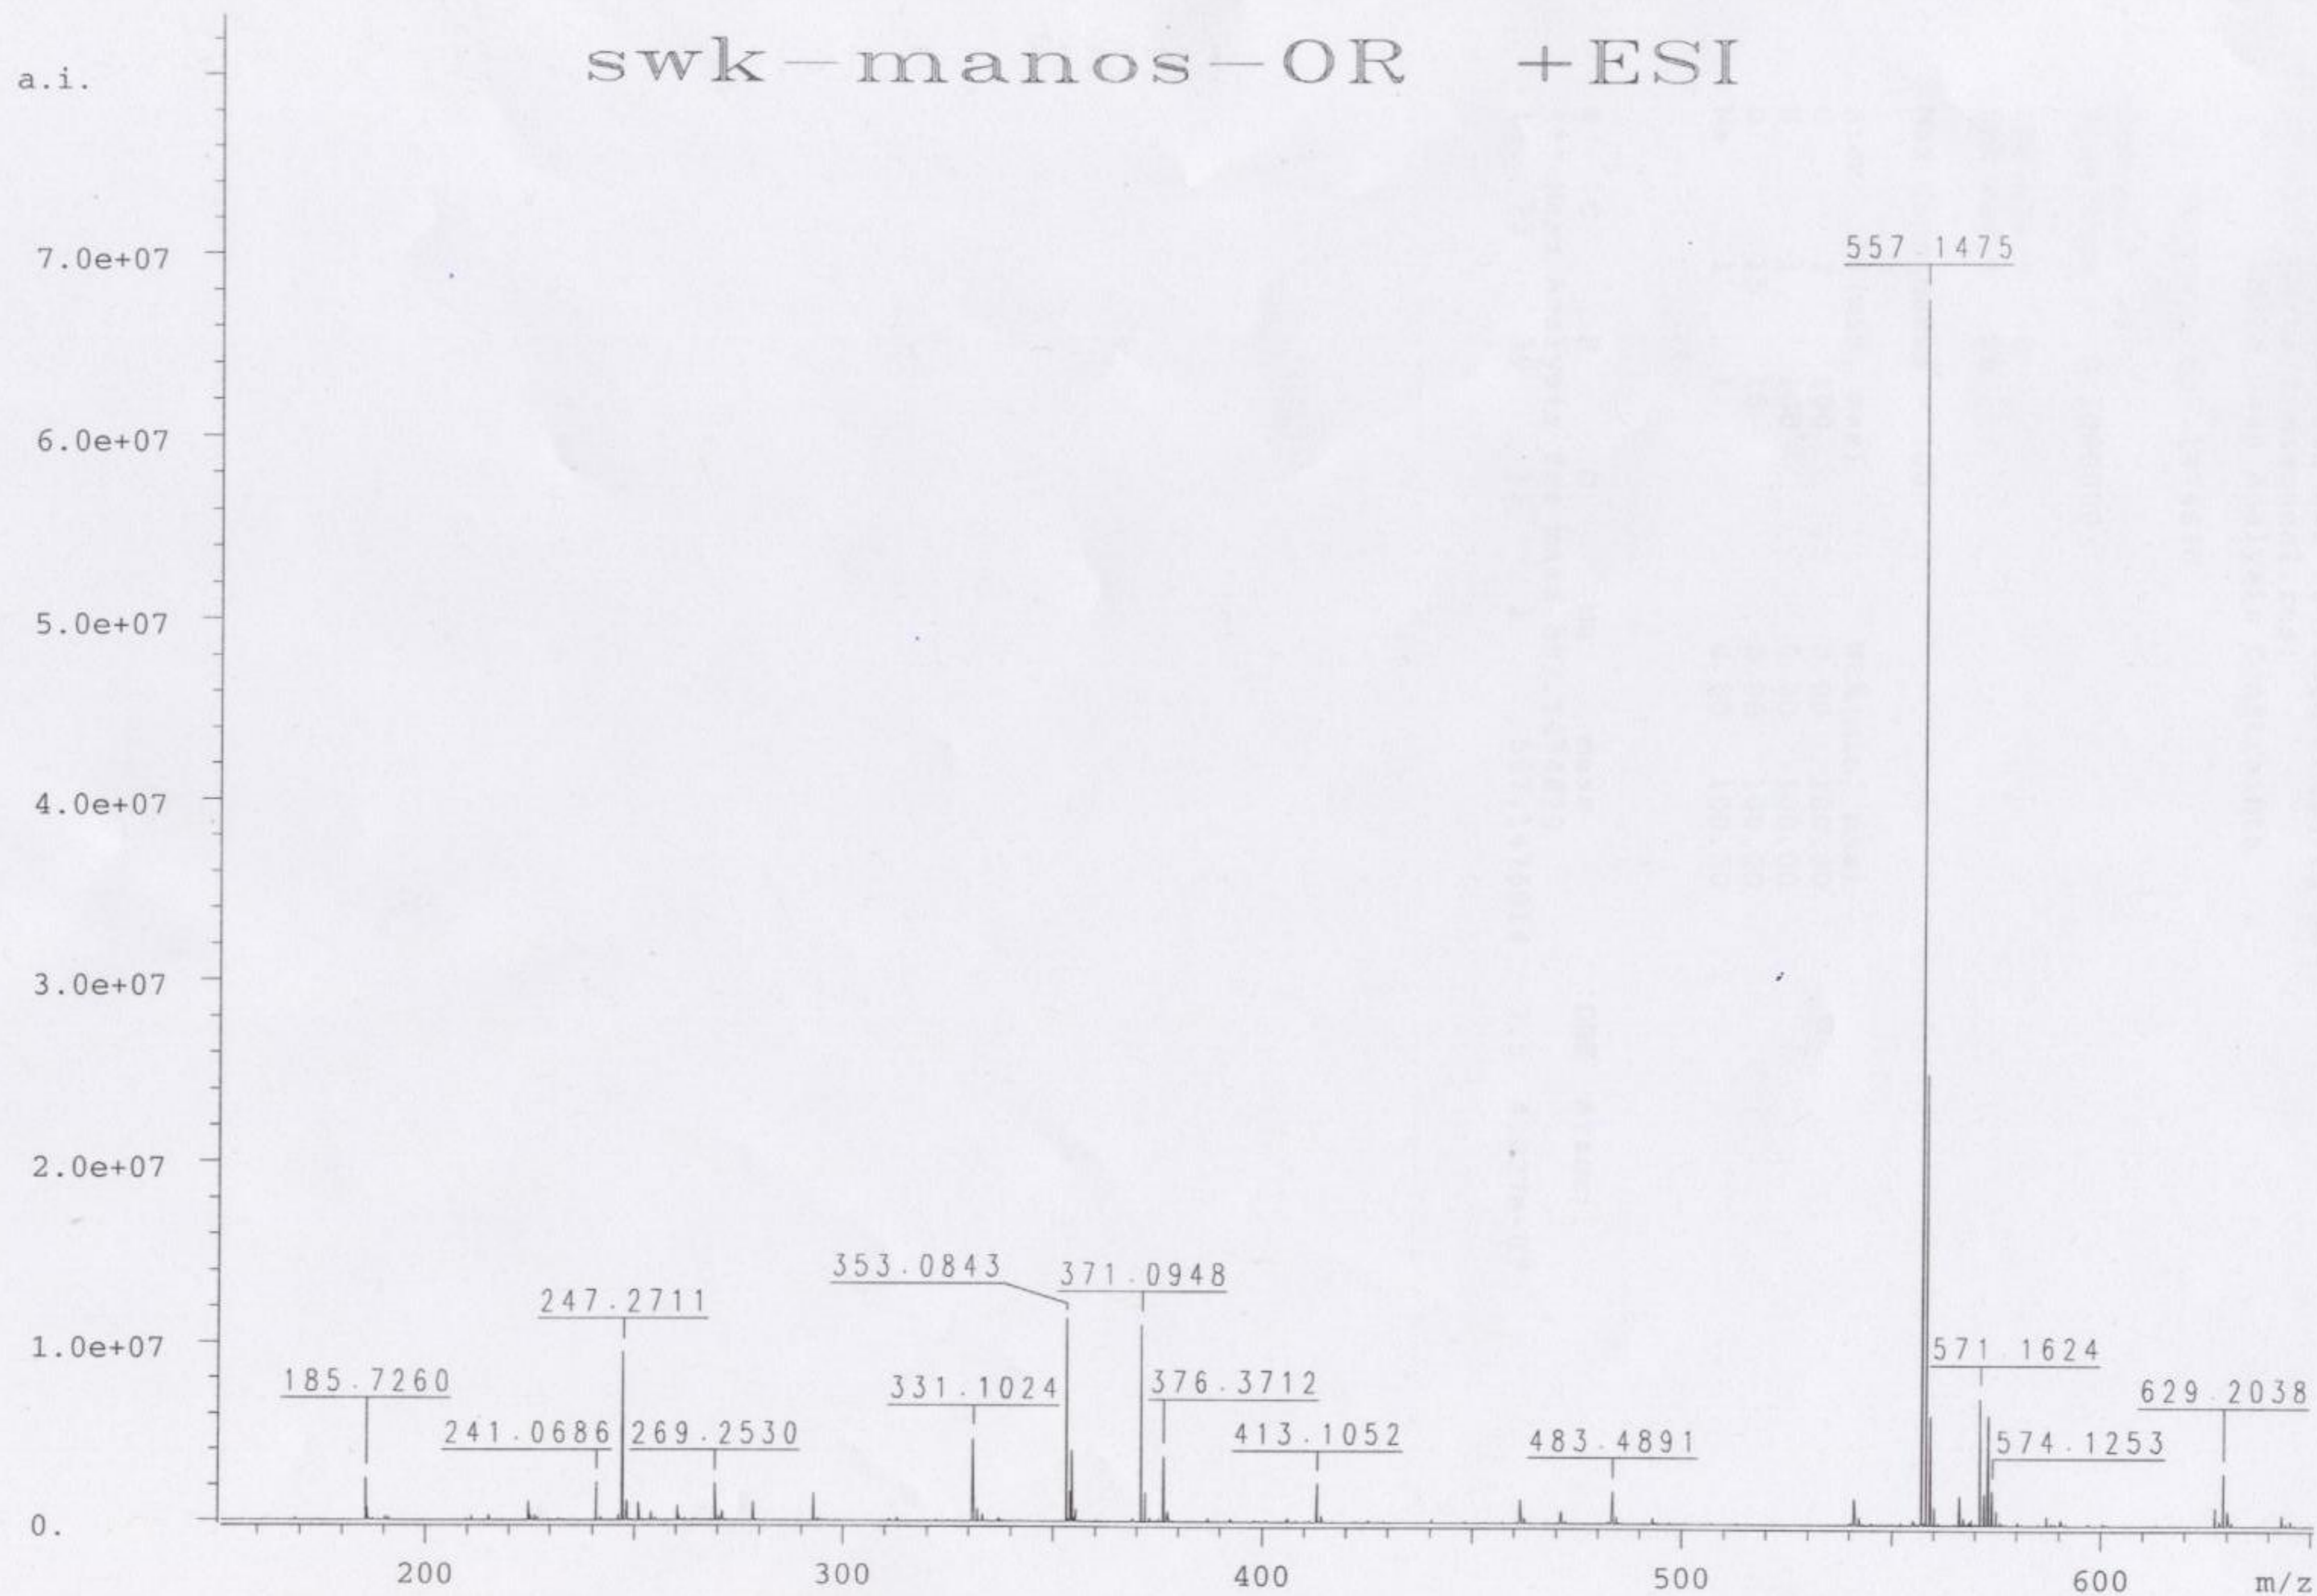

Supplement: f1 [file 9648710.f1.zip › 9648710.f1/7c/ESI-MS, compound, 7c.pdf]

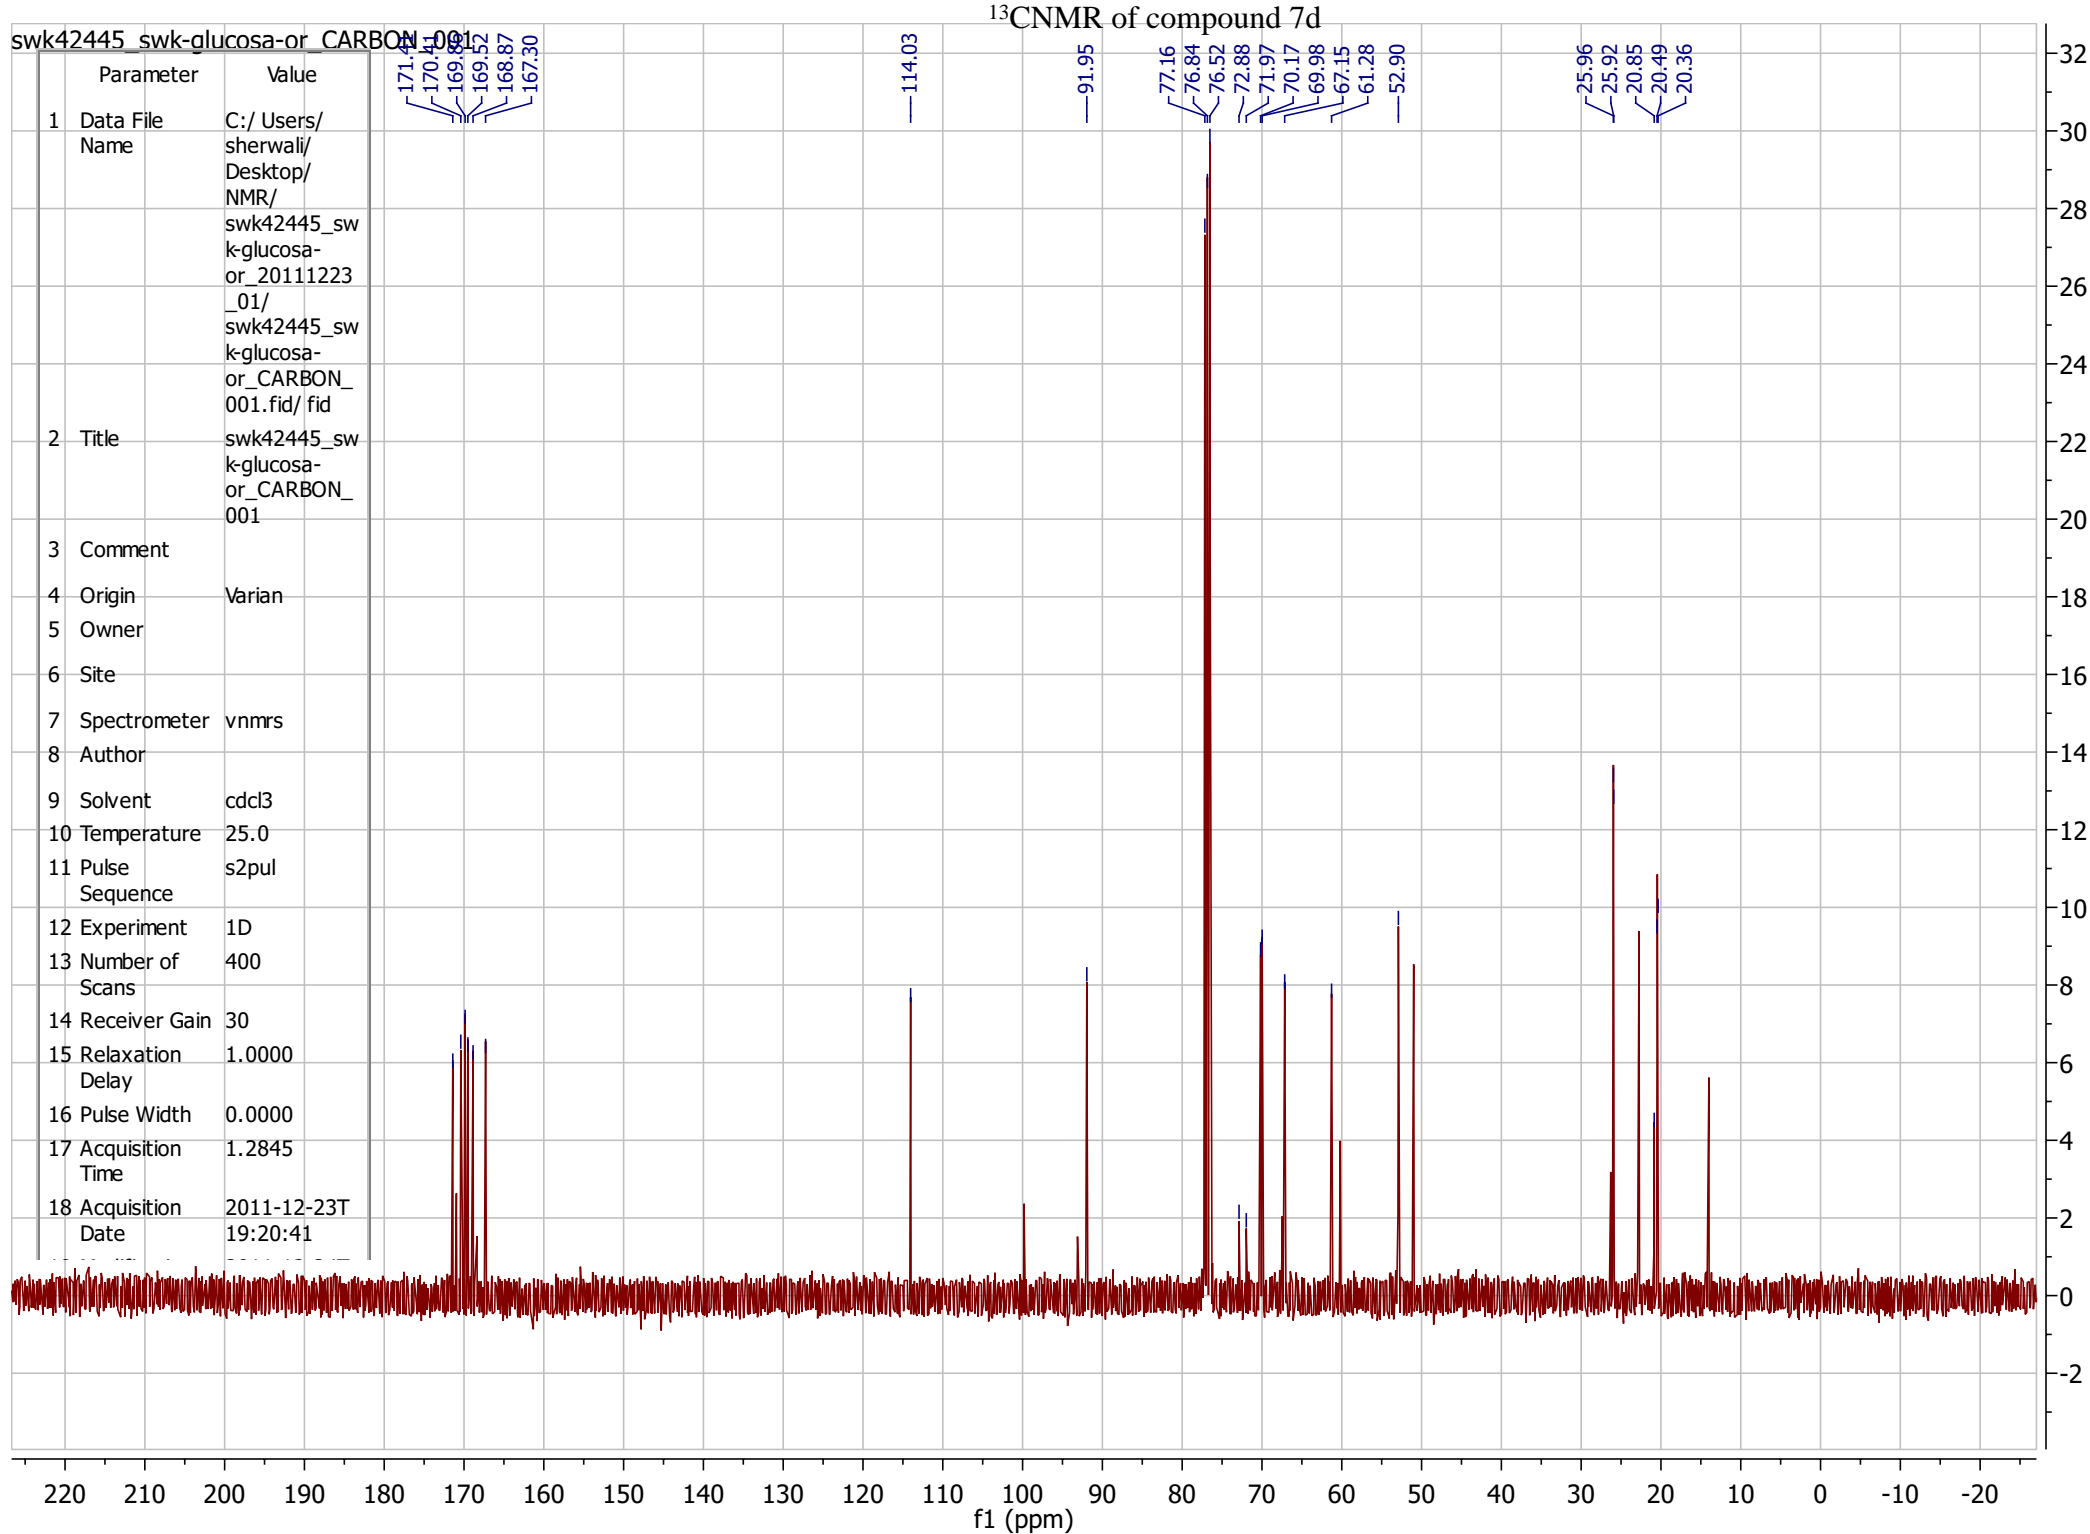

Supplement: f1 [file 9648710.f1.zip › 9648710.f1/7d/13CNMR of compound 7d.pdf]

# <sup>1</sup>HNMR of compound 7d

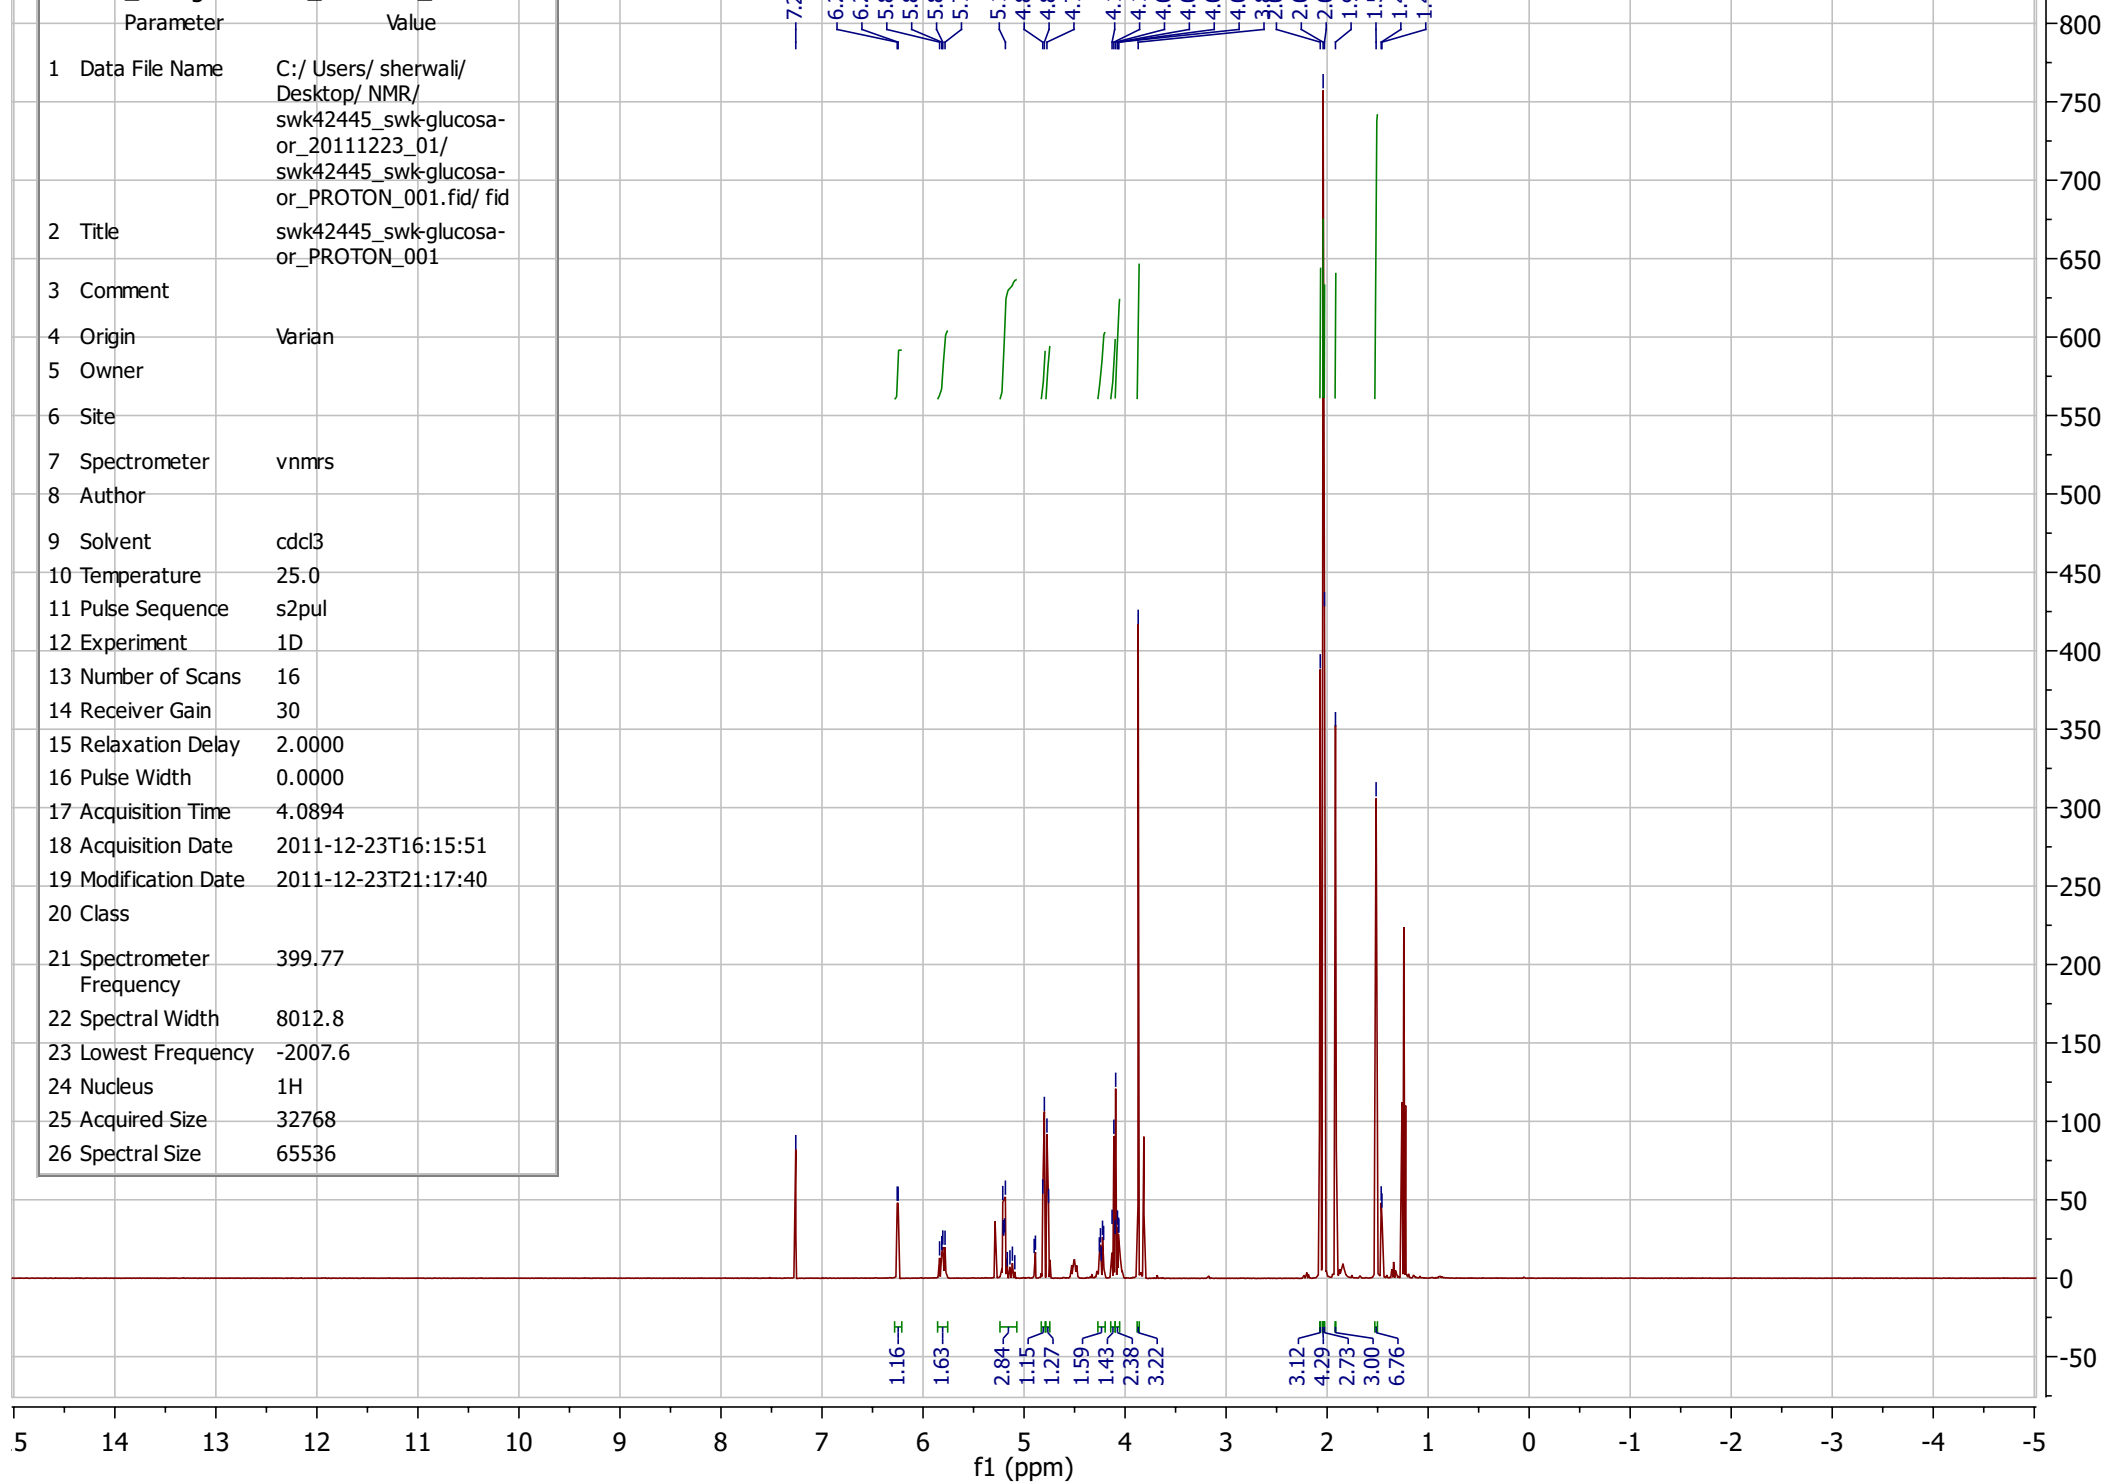

Supplement: f1 [file 9648710.f1.zip › 9648710.f1/7d/1HNMR of compound 7d.pdf]
